# Supplementary material for: Synthesis and evaluation of sulfonamide derivatives of quinoxaline 1,4-dioxides as carbonic anhydrase inhibitors
Source: Royal Society of Chemistry journal article supplement (doi:10.1039/d4ra04548c), 2024-01-01

## Supplementary Materials

### Synthesis and Evaluation of Sulfonamide Derivatives of Quinoxaline 1,4-dioxides as Carbonic Anhydrase Inhibitors

Galina I. Buravchenko <sup>a</sup>, Alexander M. Scherbakov <sup>b</sup>, Diana I. Salnikova <sup>b</sup>, Stepan K. Krymov <sup>a</sup>, George V. Zatonsky <sup>a</sup>, Dominique Schols <sup>c</sup>, Daniela Vullo,<sup>d</sup> Claudiu T. Supuran <sup>d</sup>, Andrey E. Shchekotikhin <sup>a\*</sup>

<sup>a</sup> Gause Institute of New Antibiotics, 11 B. Pirogovskaya Street, Moscow, 119021, Russia;

[buravchenkogi@gmail.com](mailto:buravchenkogi@gmail.com); [krymov.s.k@gmail.com](mailto:krymov.s.k@gmail.com); [gzatonsk@gmail.com](mailto:gzatonsk@gmail.com); [shchekotikhin@mail.ru](mailto:shchekotikhin@mail.ru)

<sup>b</sup> Department of Experimental Tumor Biology, Institute of Carcinogenesis, Blokhin N.N. National Medical Research Center of Oncology, Kashirskoe sh. 24, 115522 Moscow, Russia; [dianasalnikova08@yandex.ru](mailto:dianasalnikova08@yandex.ru); [alex.scherbakov@gmail.com](mailto:alex.scherbakov@gmail.com).

<sup>c</sup> Rega Institute for Medical Research, KU Leuven, 3000 Leuven, Belgium, [dominique.schols@kuleuven.be](mailto:dominique.schols@kuleuven.be).

<sup>d</sup> Department of NEUROFARBA, Section of Pharmaceutical and Nutraceutical Sciences, University of Florence, Florence, Italy, [daniela.vullo@unifi.it](mailto:daniela.vullo@unifi.it) ; [claudiu.supuran@unifi.it](mailto:claudiu.supuran@unifi.it).

\*Corresponding authors e-mail address: Andrey E. Shchekotikhin [shchekotikhin@gause-inst.ru](mailto:shchekotikhin@gause-inst.ru).

#### Legends to Figures and Tables

|                                                                                                                                                             |            |
|-------------------------------------------------------------------------------------------------------------------------------------------------------------|------------|
| <b>Figure S1-S36.</b> <sup>1</sup> H and <sup>13</sup> C NMR spectra of the compounds <b>7a-h</b> ; <b>8a-c</b> ; <b>8g</b> ; <b>11-12</b> ; <b>14-16</b> . | <b>S2</b>  |
| <b>Figure S37-S53.</b> Copies of HRMS ESI spectra of the compounds <b>7a-h</b> ; <b>8a-c</b> ; <b>8g</b> ; <b>11-12</b> ; <b>14-16</b> .                    | <b>S20</b> |
| <b>Figure S55-S67.</b> Copies of HPLC spectra of the compounds <b>7a-h</b> ; <b>8a-c</b> ; <b>8g</b> .                                                      | <b>S38</b> |
| <b>Figure S68-S70.</b> Copies of 2D NMR spectra of <b>7a</b> .                                                                                              | <b>S51</b> |

## Copies of NMR Spectra

**Figure S1.** Copy of  $^1\text{H}$  NMR spectrum of the derivative **7a**.

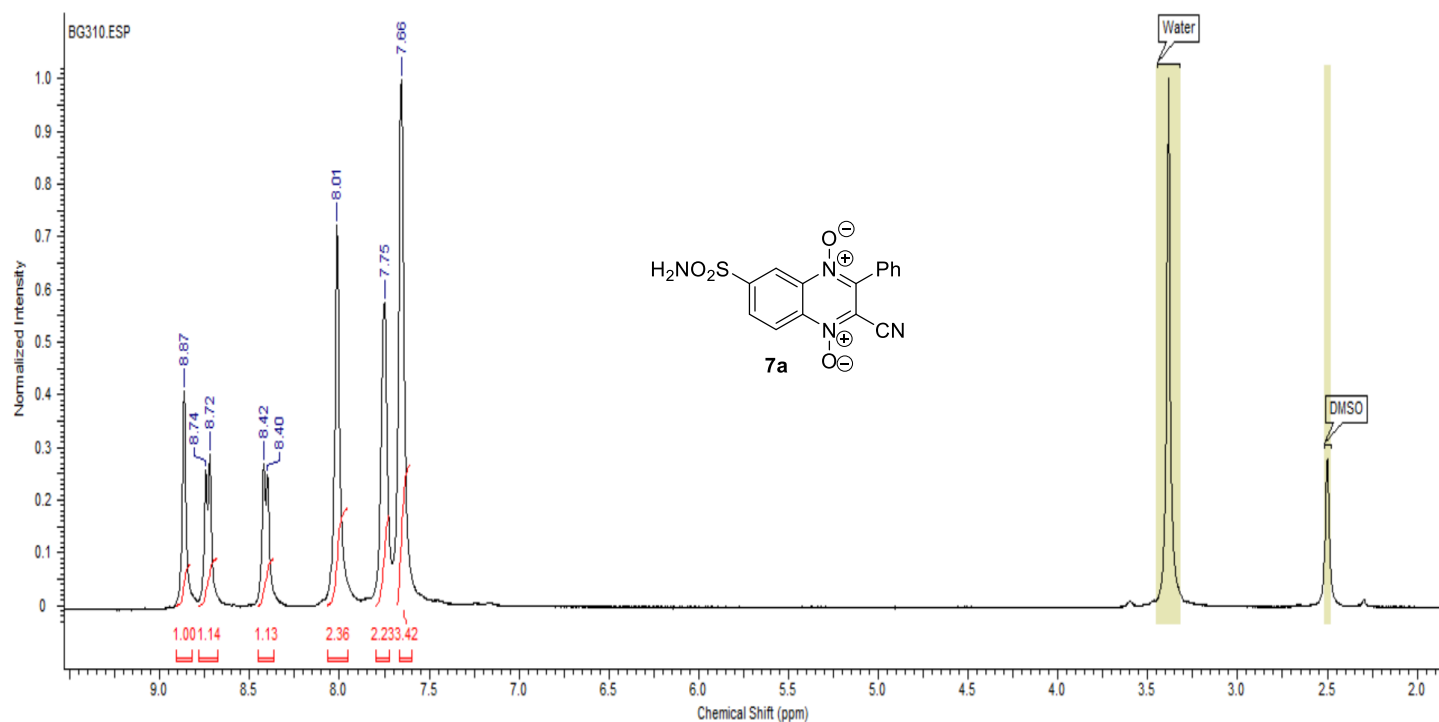

**Figure S2.** Copy of  $^{13}\text{C}$  NMR spectrum of the derivative **7a**.

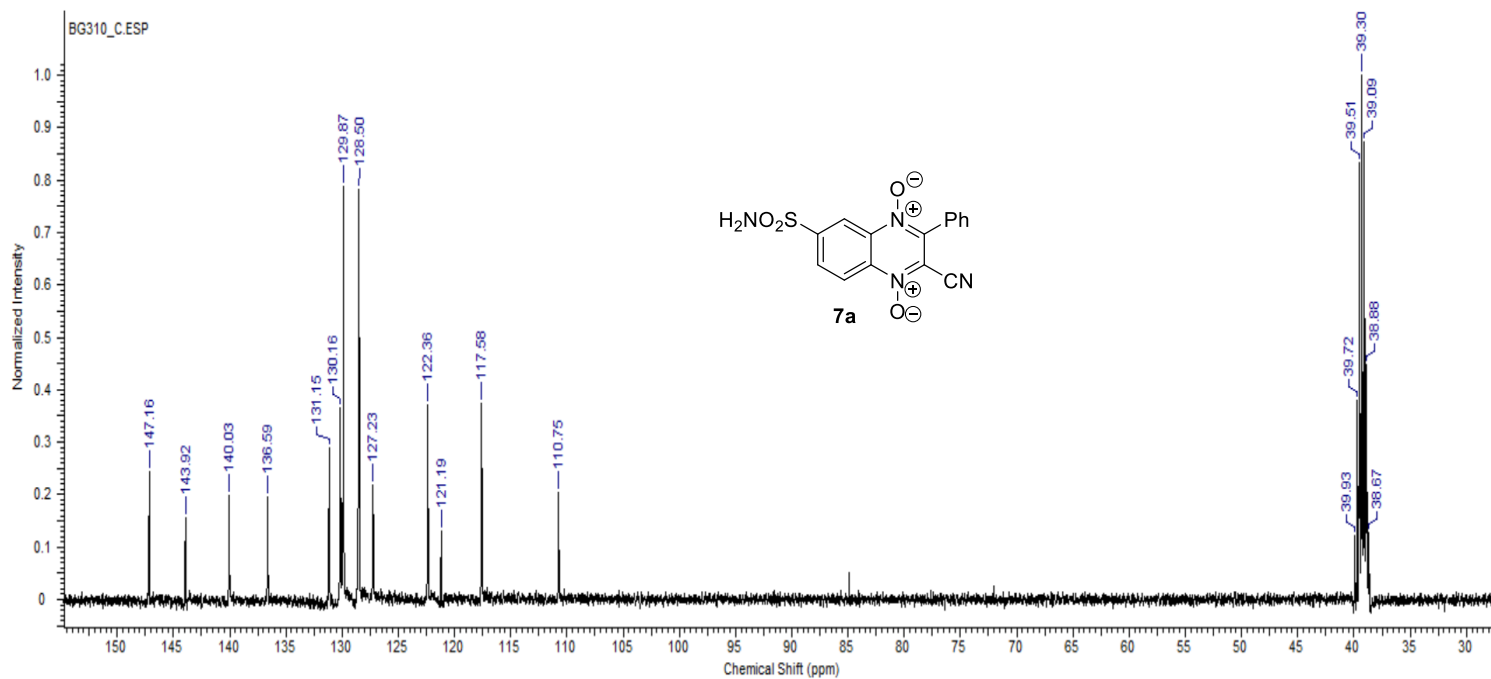

**Figure S3.** Copy of  $^1\text{H}$  NMR spectrum of the derivative **7b**.

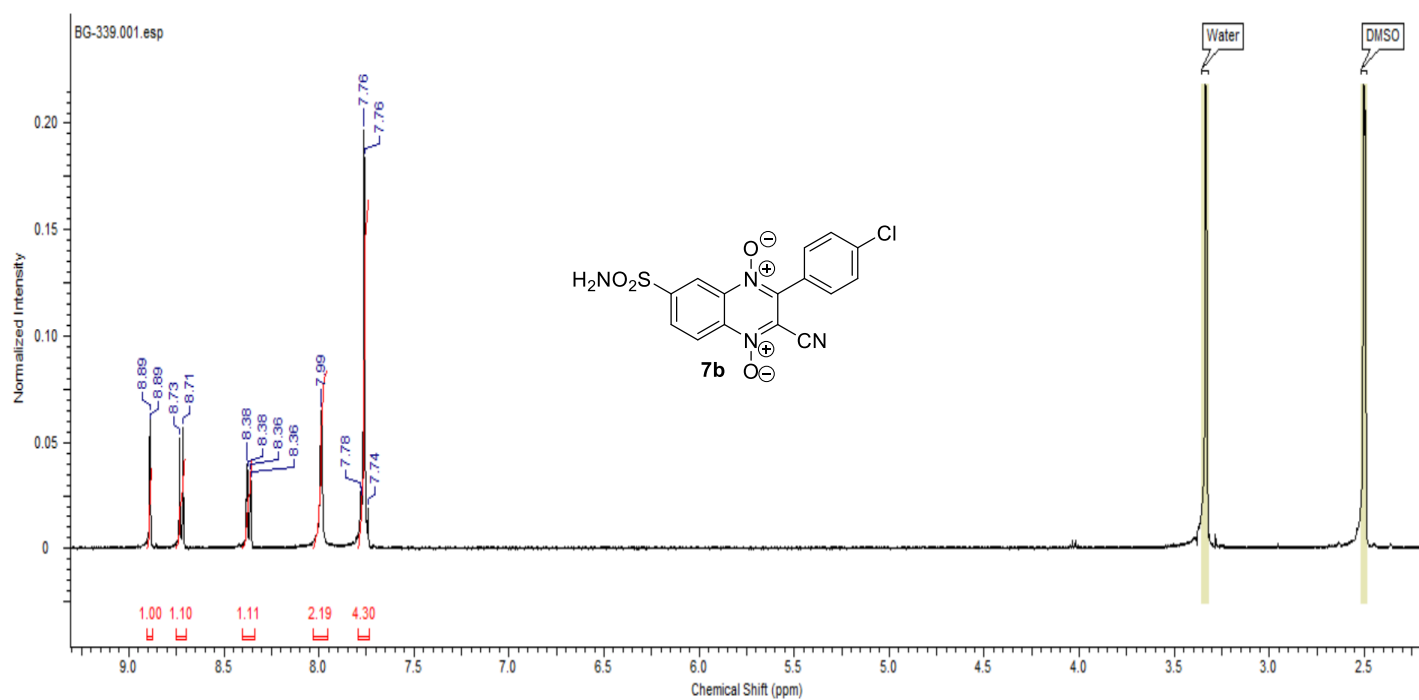

**Figure S4.** Copy of  $^{13}\text{C}$  NMR spectrum of the derivative **7b**.

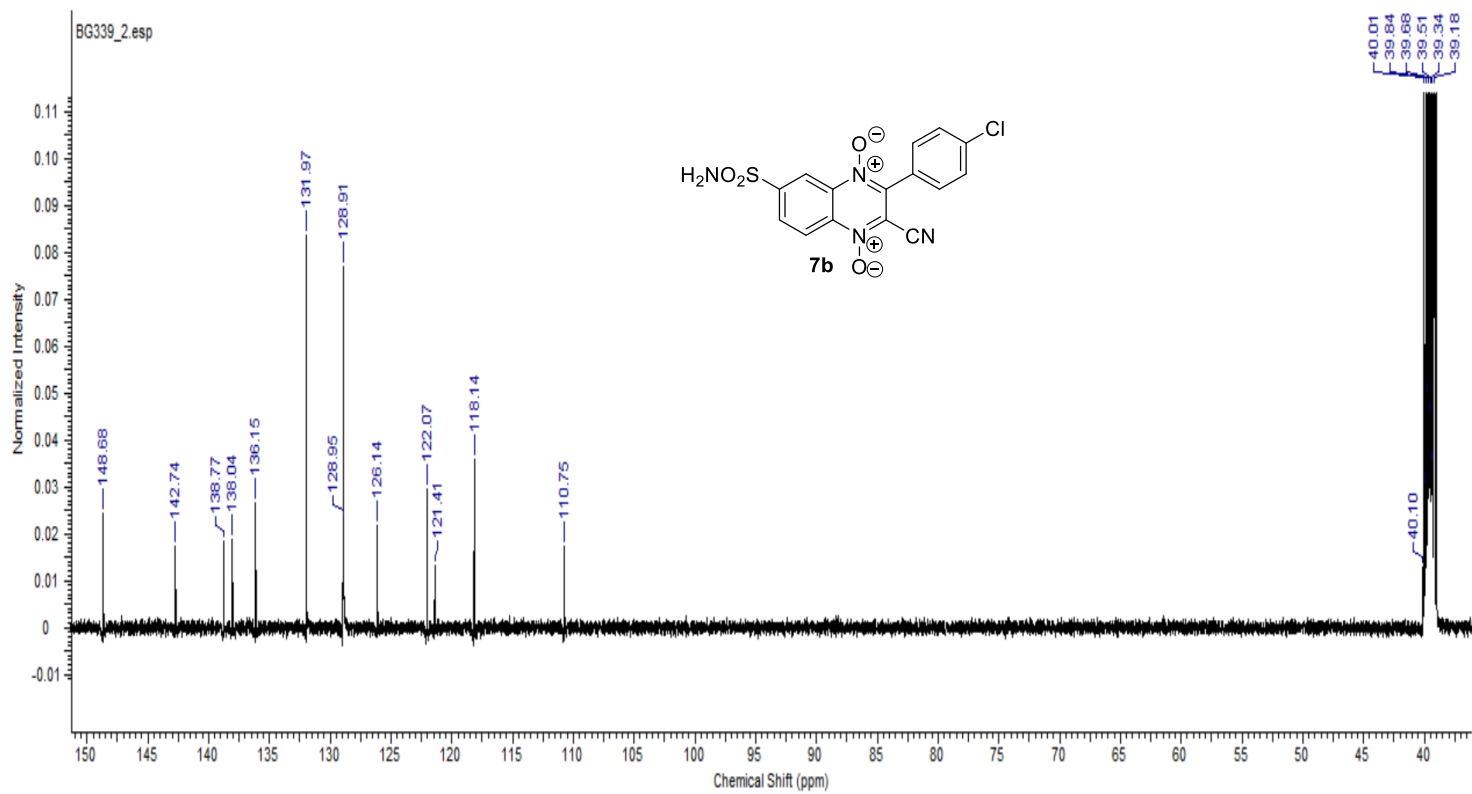

Figure S5. Copy of  $^1\text{H}$  NMR spectrum of the derivative **7c**.

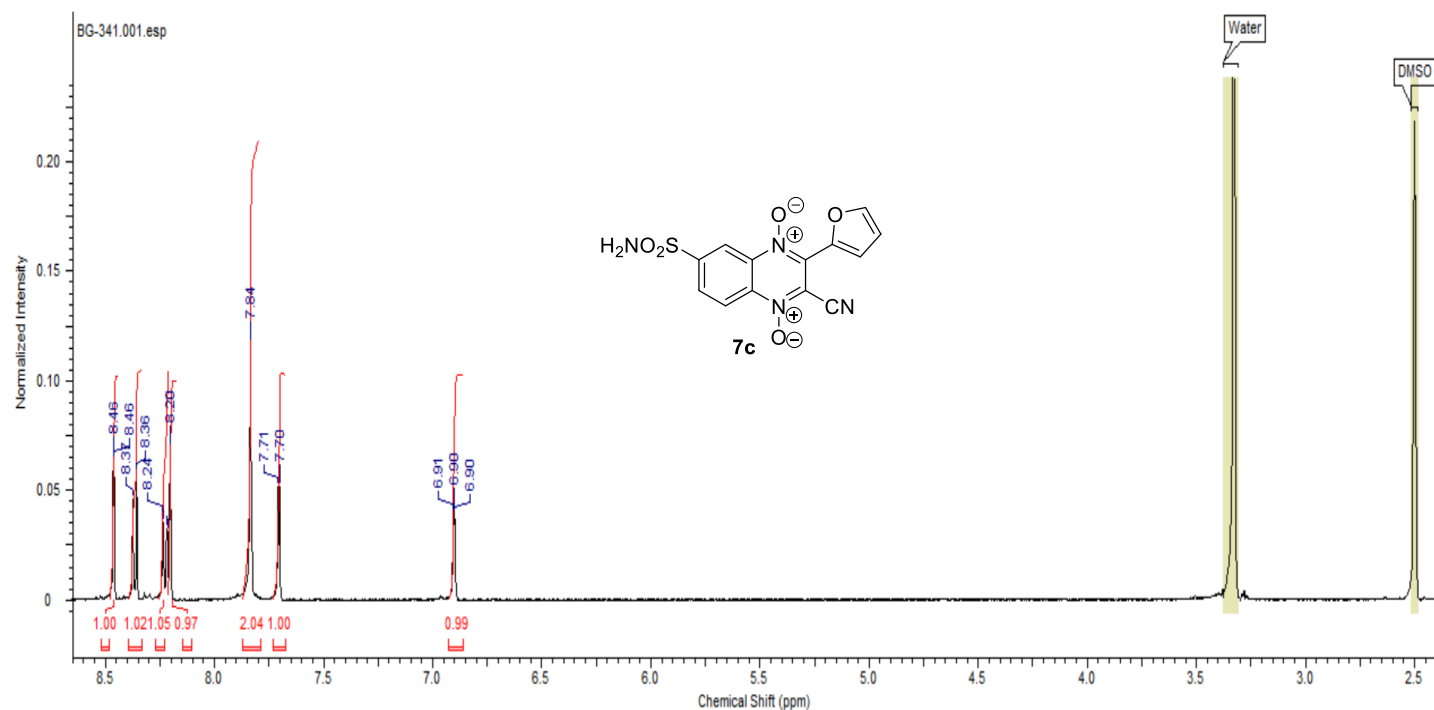

Figure S6. Copy of  $^{13}\text{C}$  NMR spectrum of the derivative **7c**.

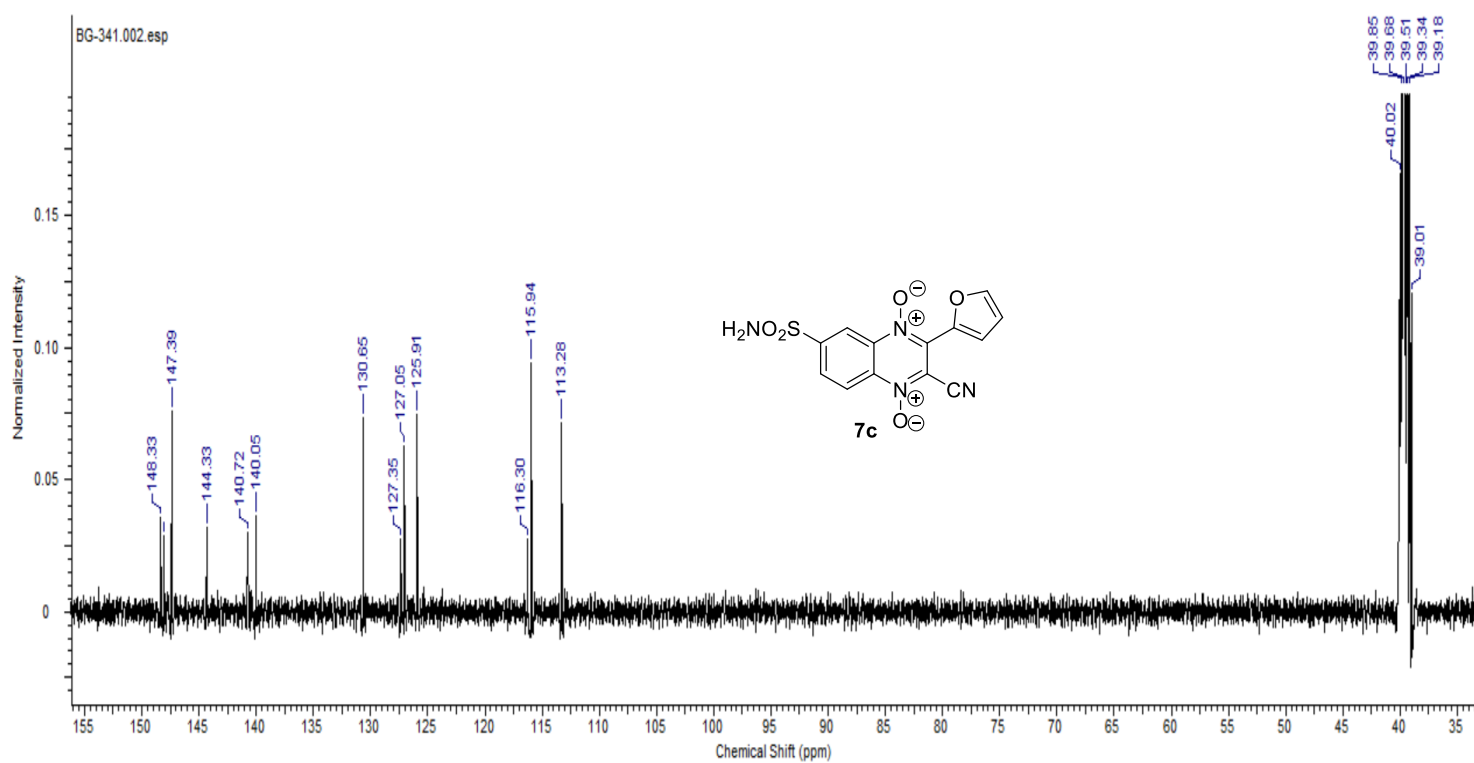

**Figure S7.** Copy of  $^1\text{H}$  NMR spectrum of the derivative **7d**.

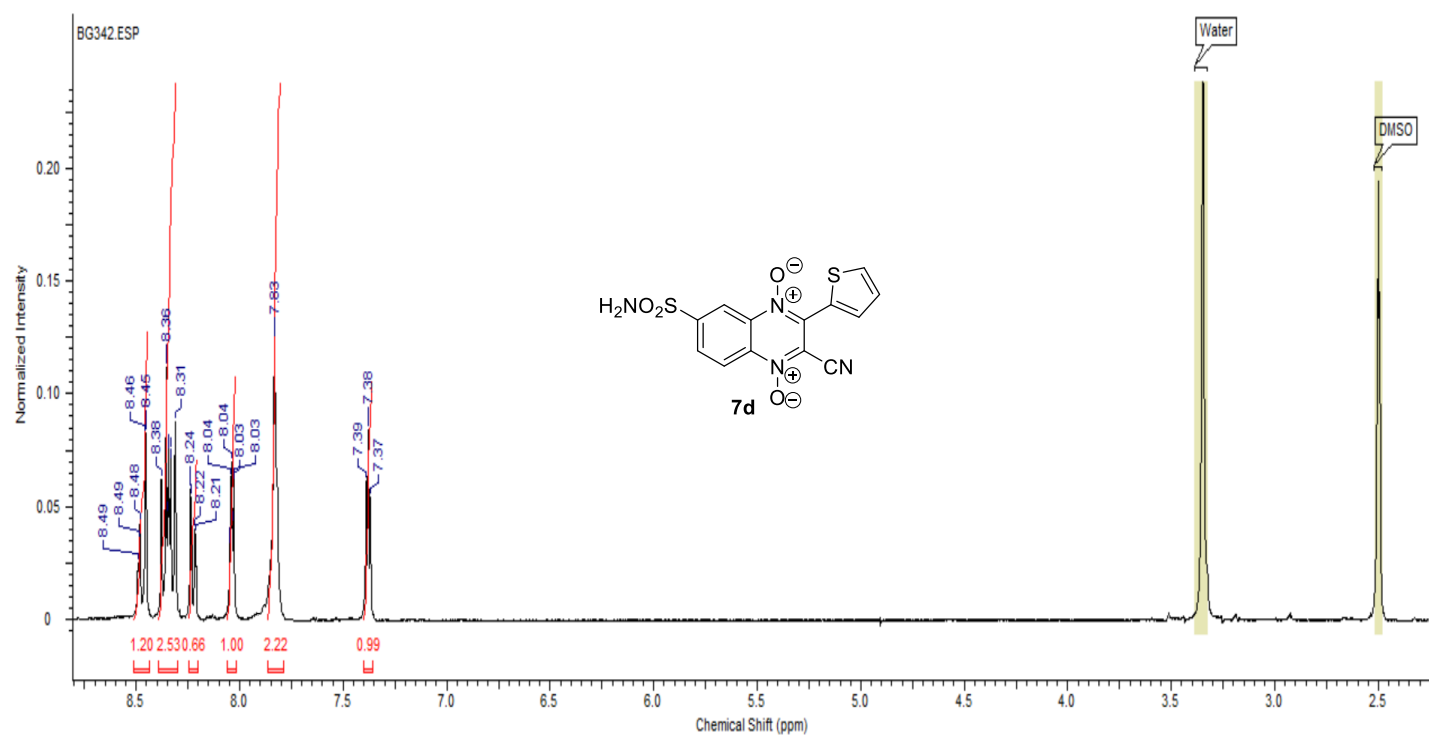

**Figure S8.** Copy of  $^{13}\text{C}$  NMR spectrum of the derivative **7d**.

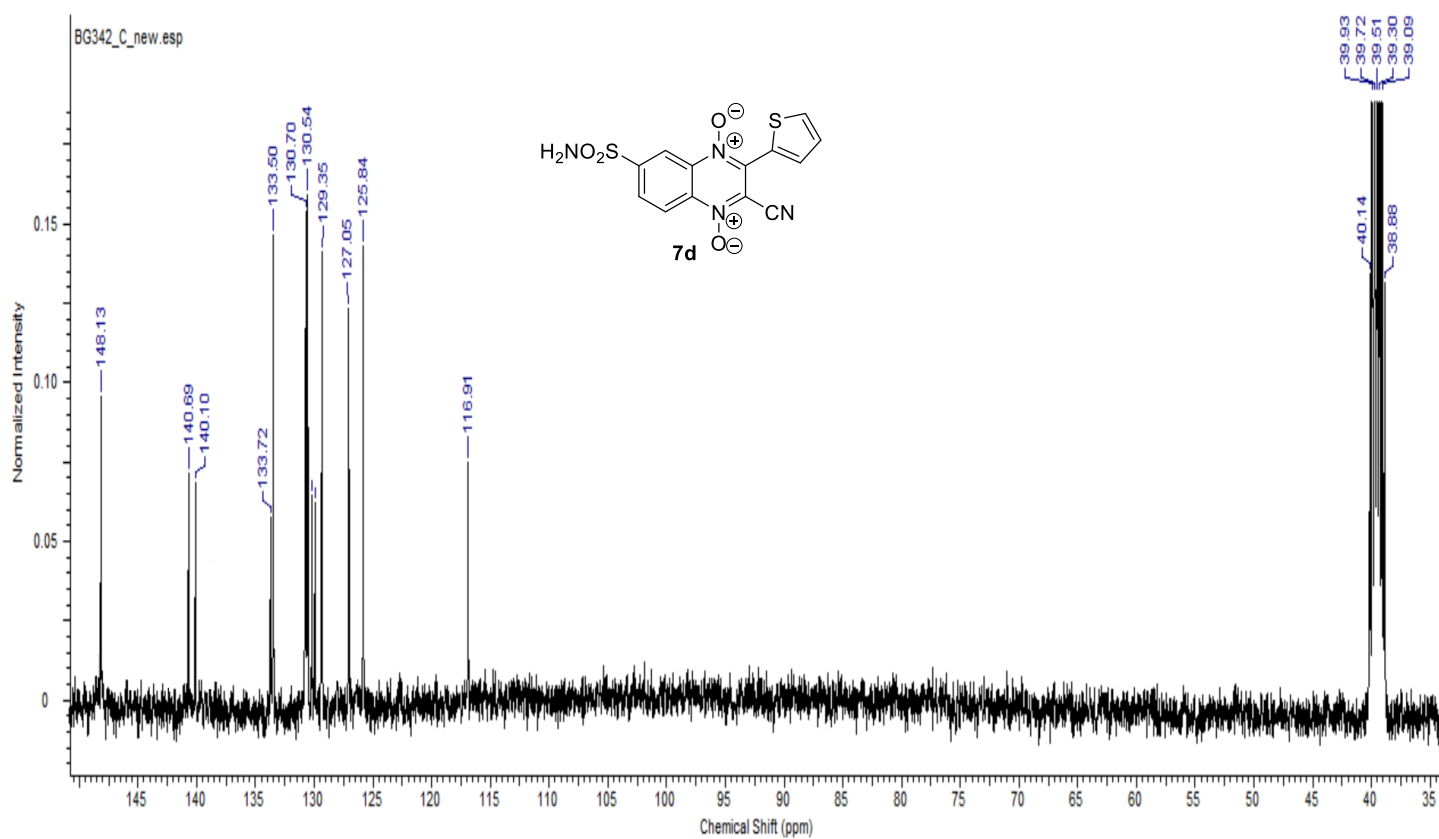

**Figure S9.** Copy of  $^1\text{H}$  NMR spectrum of the derivative **7e**.

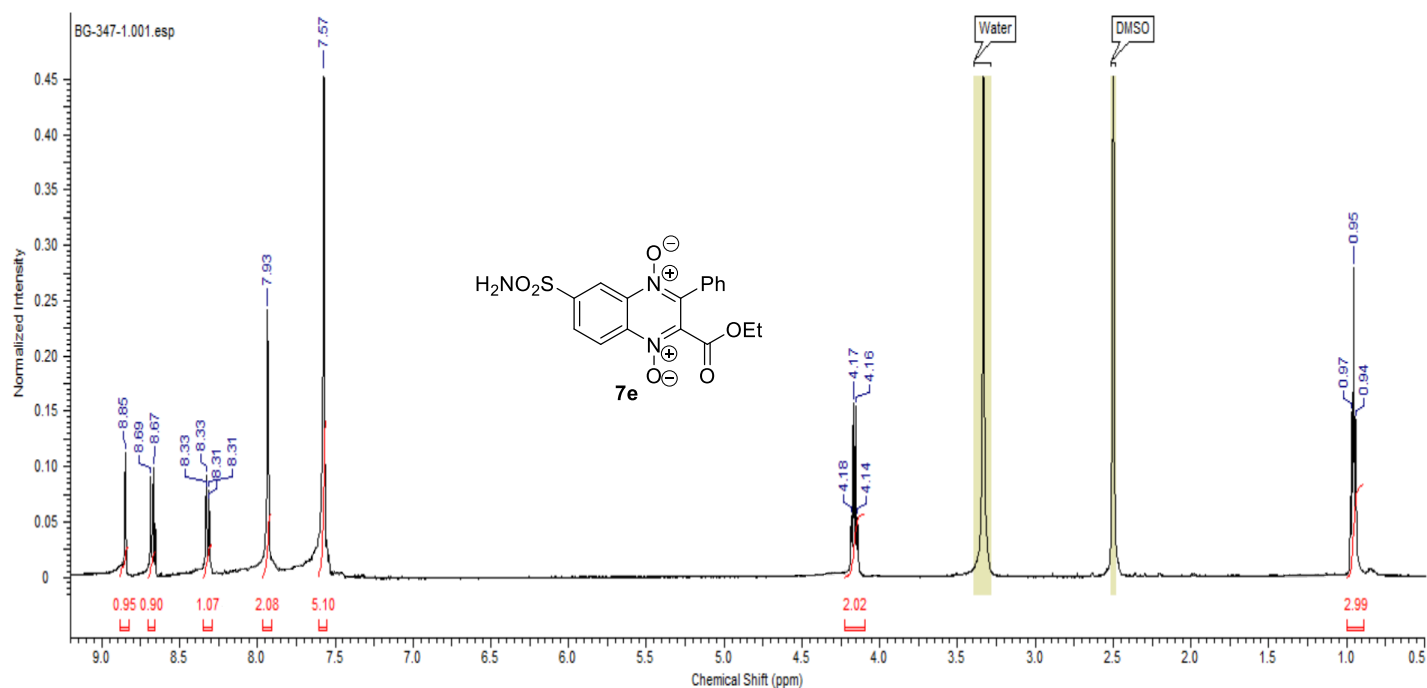

**Figure S10.** Copy of  $^{13}\text{C}$  NMR spectrum of the derivative **7e**.

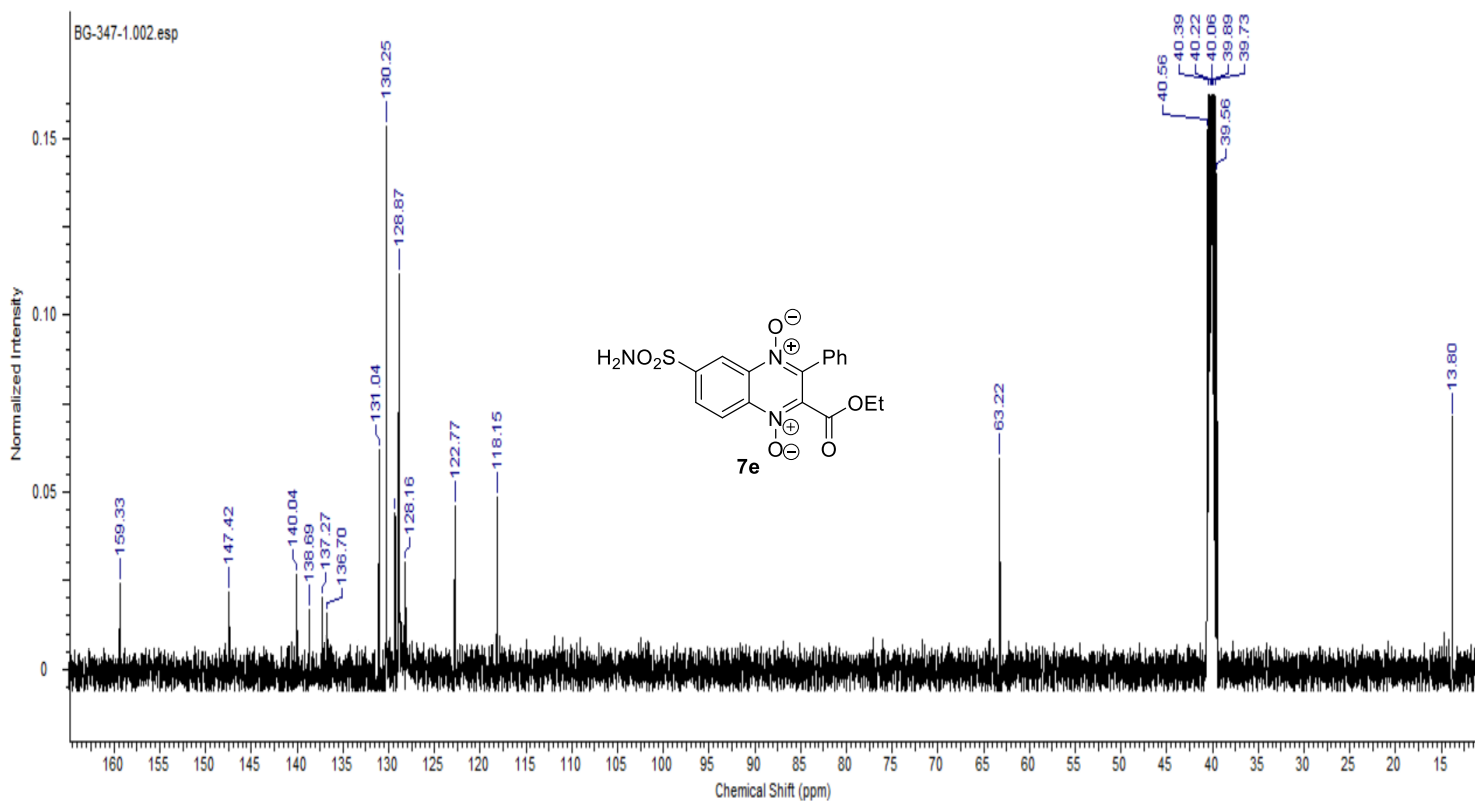

**Figure S11.** Copy of  $^1\text{H}$  NMR spectrum of the derivative **7f**.

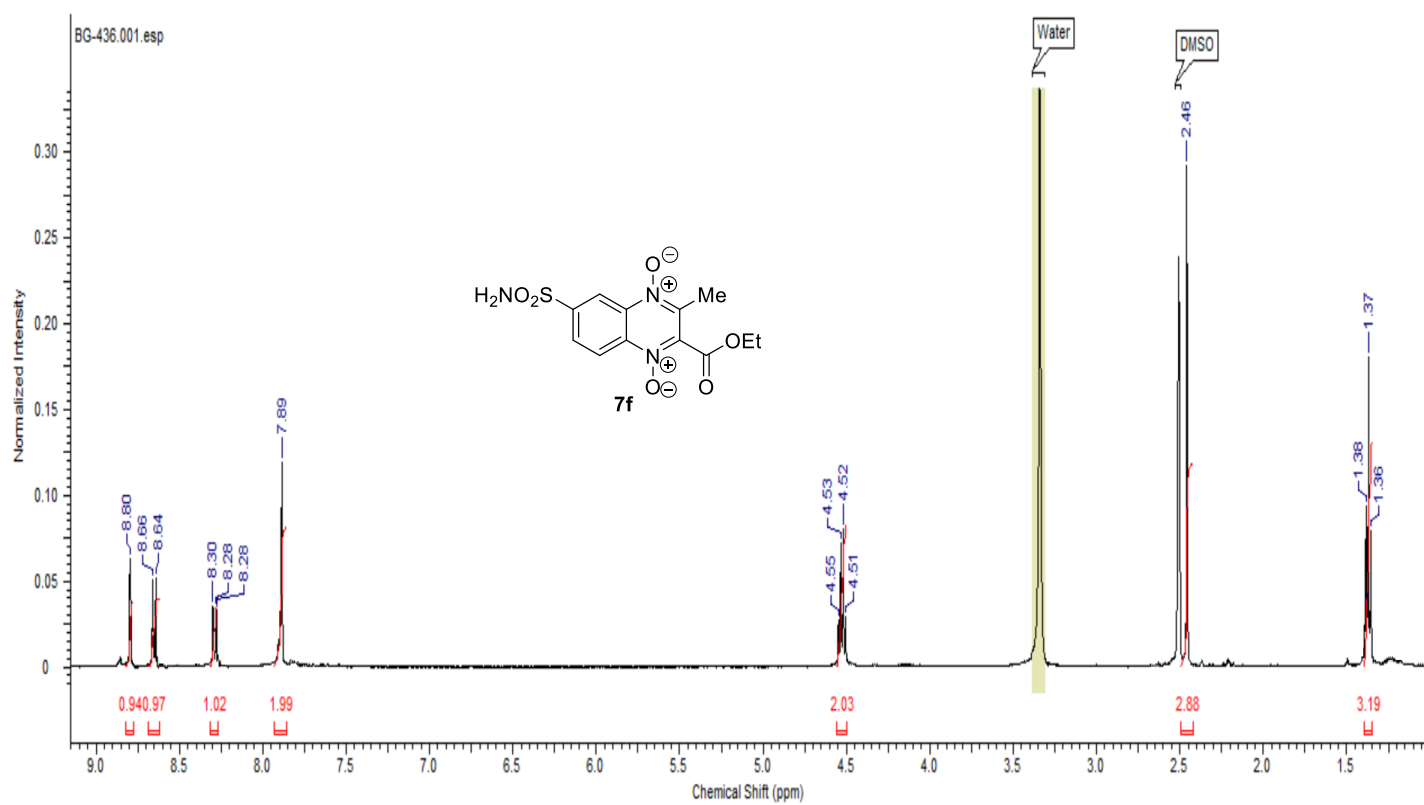

**Figure S12.** Copy of  $^{13}\text{C}$  NMR spectrum of the derivative **7f**.

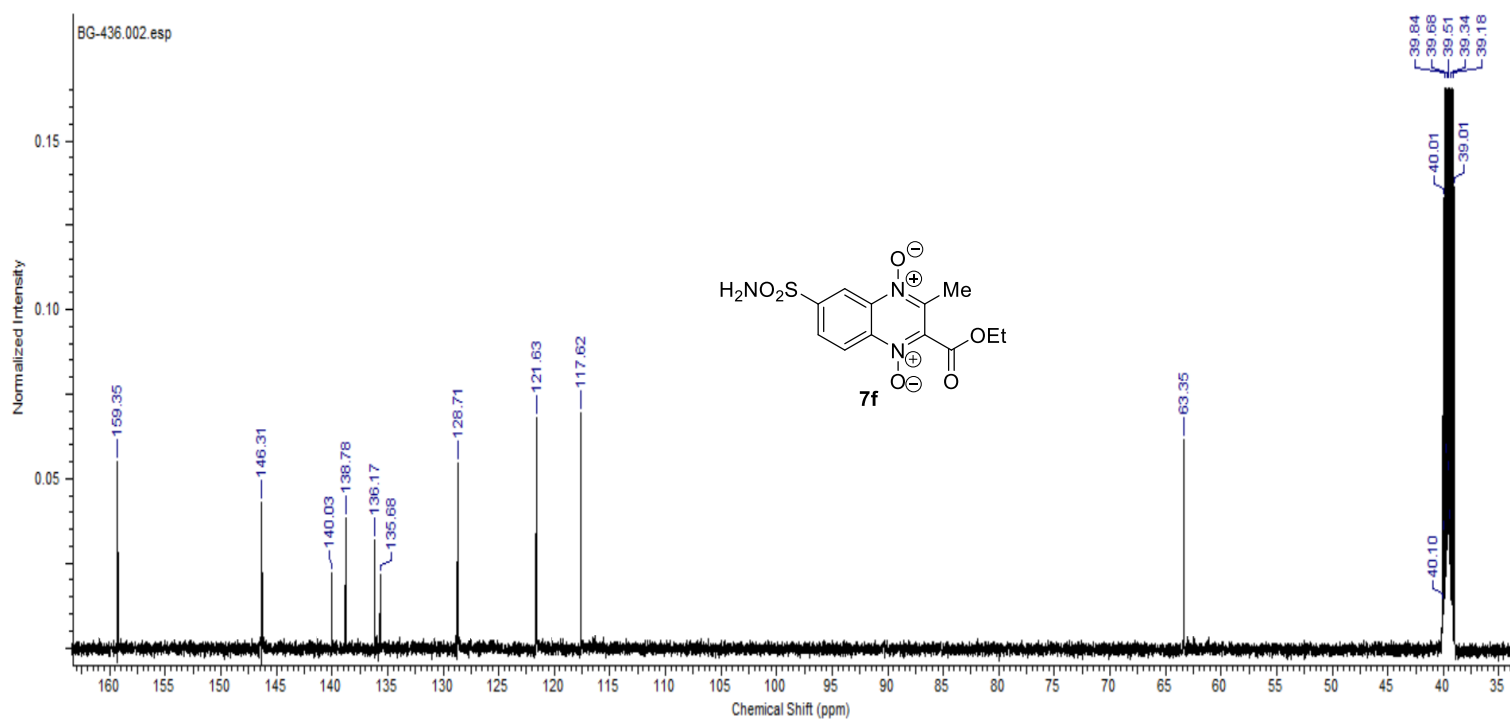

Figure S13. Copy of  $^1\text{H}$  NMR spectrum of the derivative **7g**.

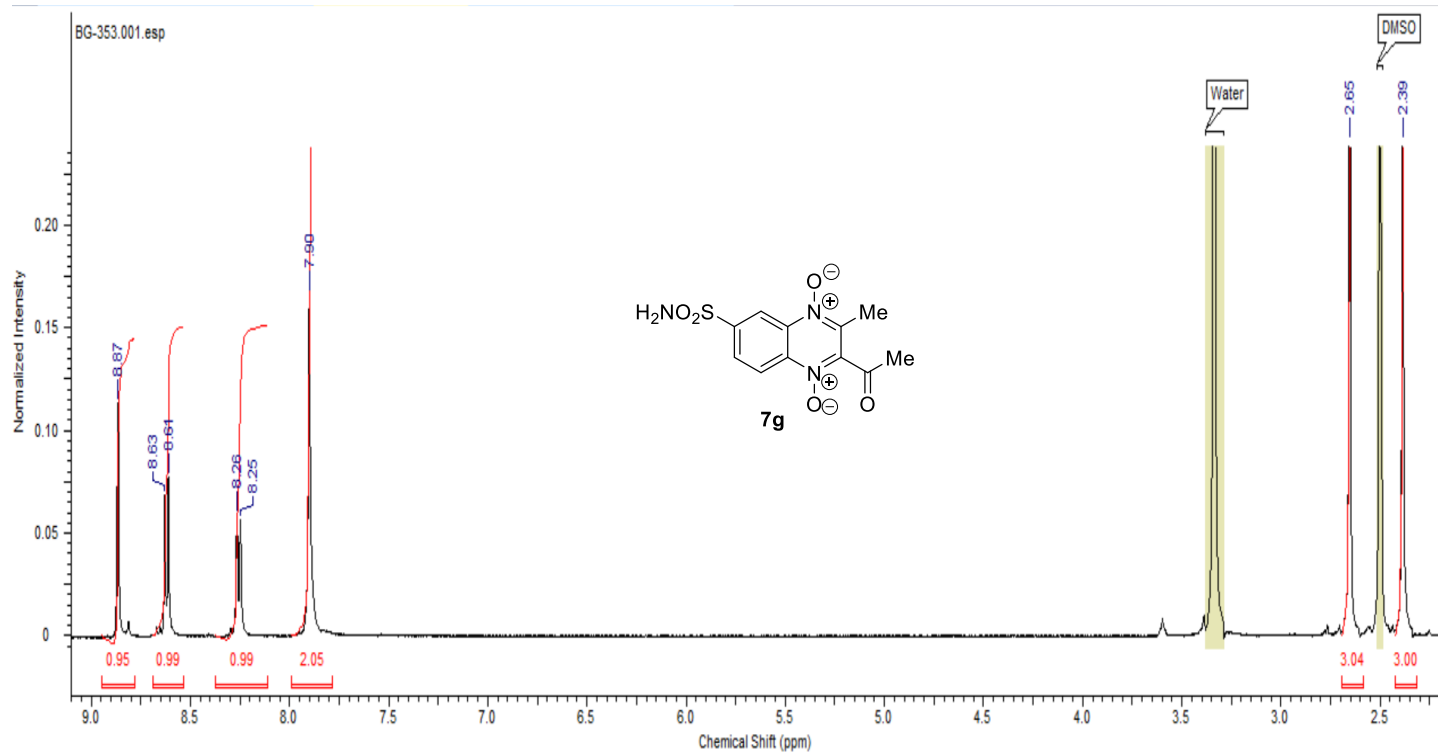

Figure S14. Copy of  $^{13}\text{C}$  NMR spectrum of the derivative **7g**.

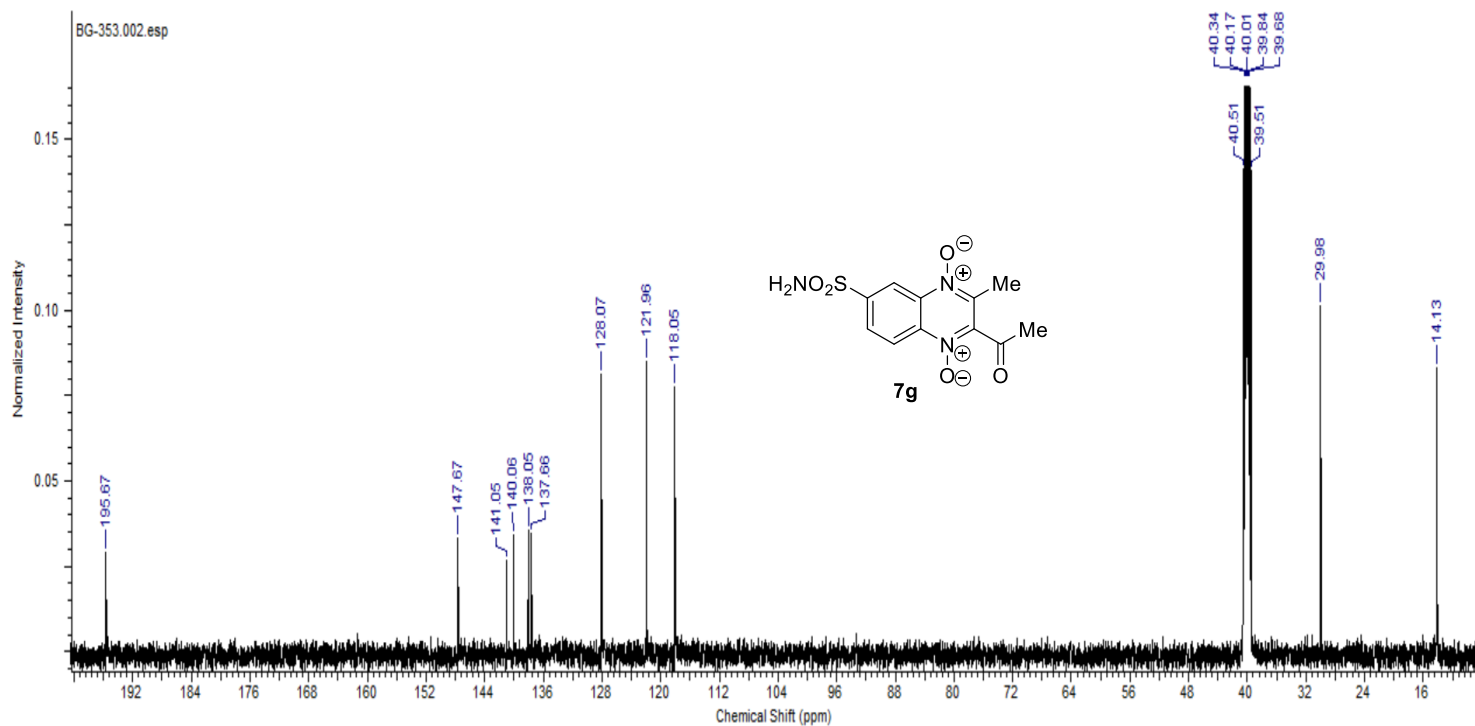



Figure S15. Copy of  $^1\text{H}$  NMR spectrum of the derivative **7h**.

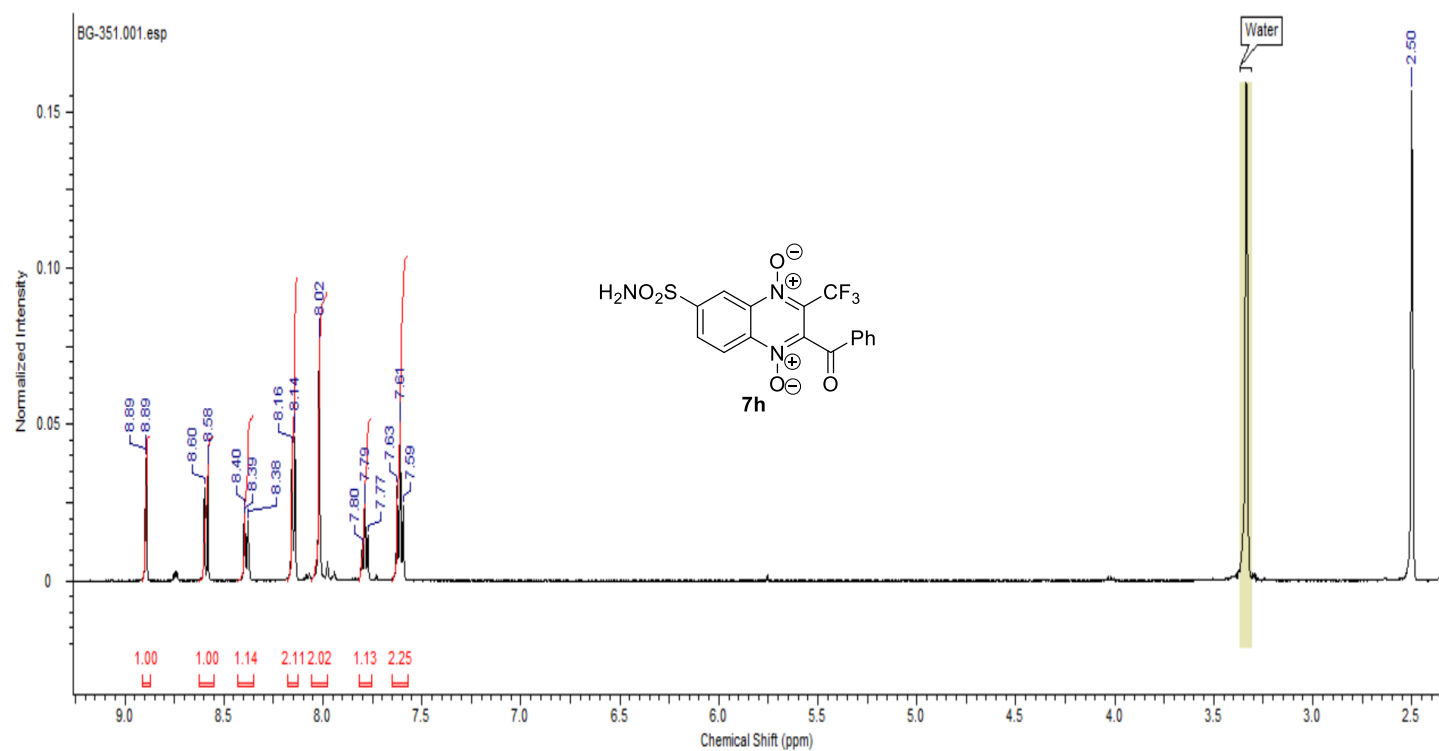

Figure S16. Copy of  $^{13}\text{C}$  NMR spectrum of the derivative **7h**.

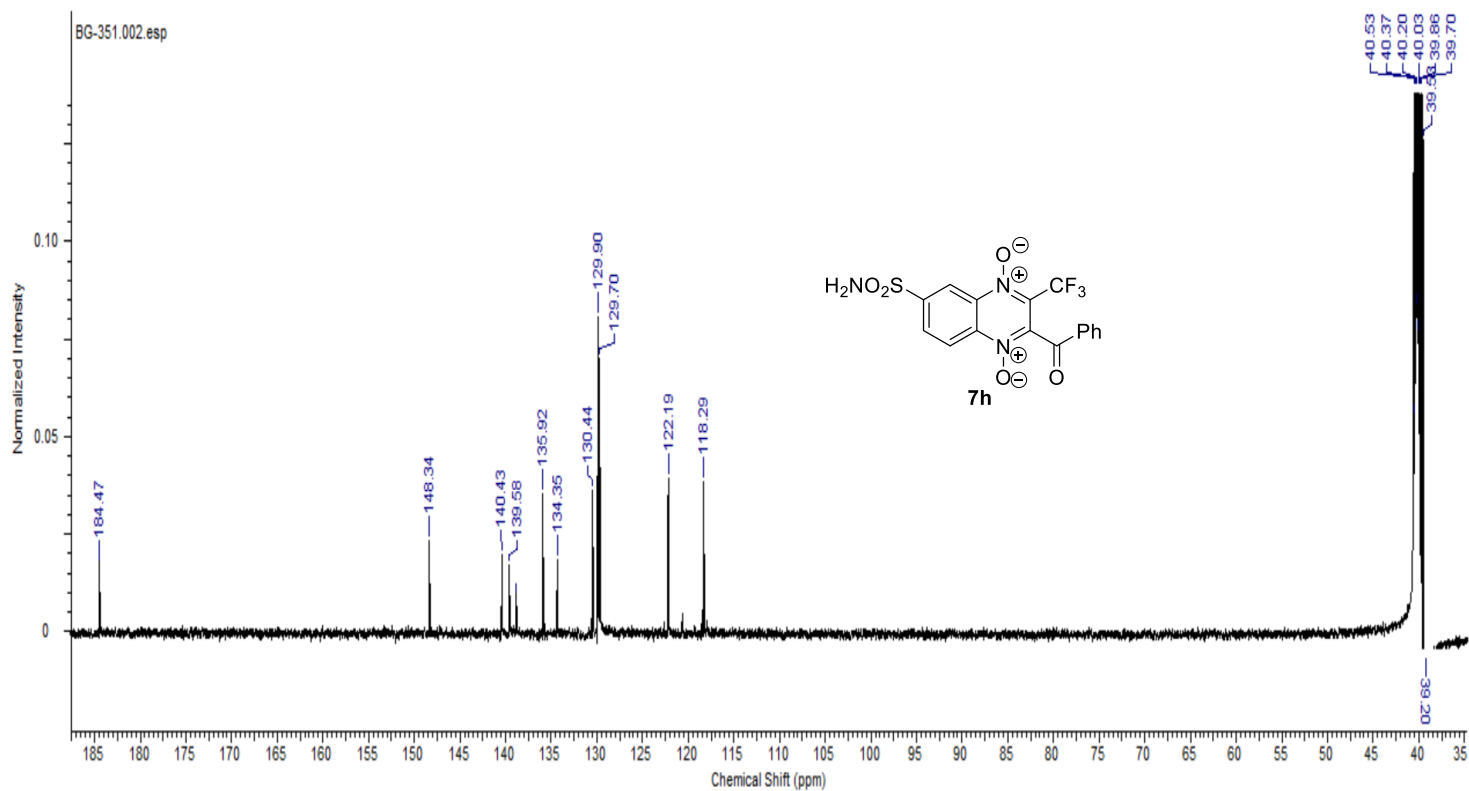

Figure S17. Copy of  $^1\text{H}$  NMR spectrum of the derivative **8a**.

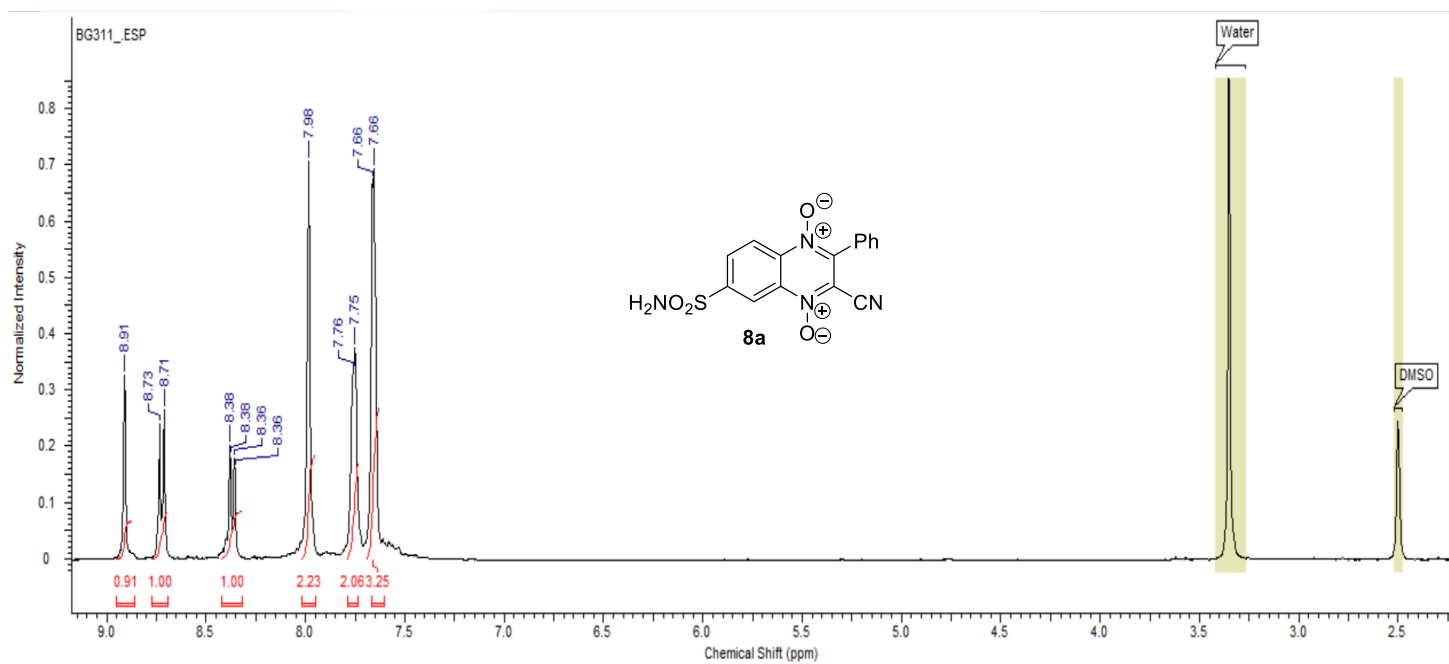

Figure S18. Copy of  $^{13}\text{C}$  NMR spectrum of the derivative **8a**.

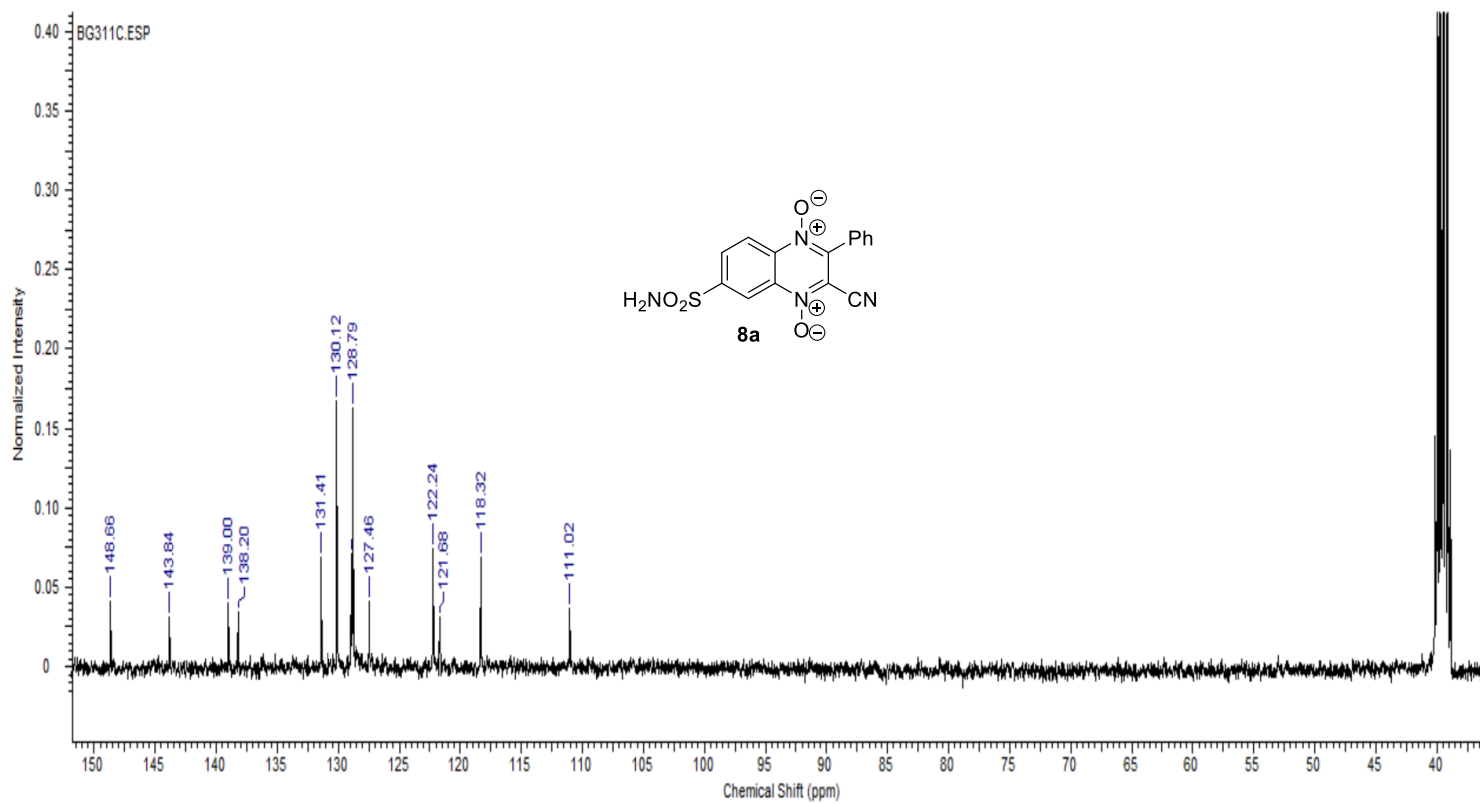

Figure S19. Copy of  $^1\text{H}$  NMR spectrum of the derivative **8b**.

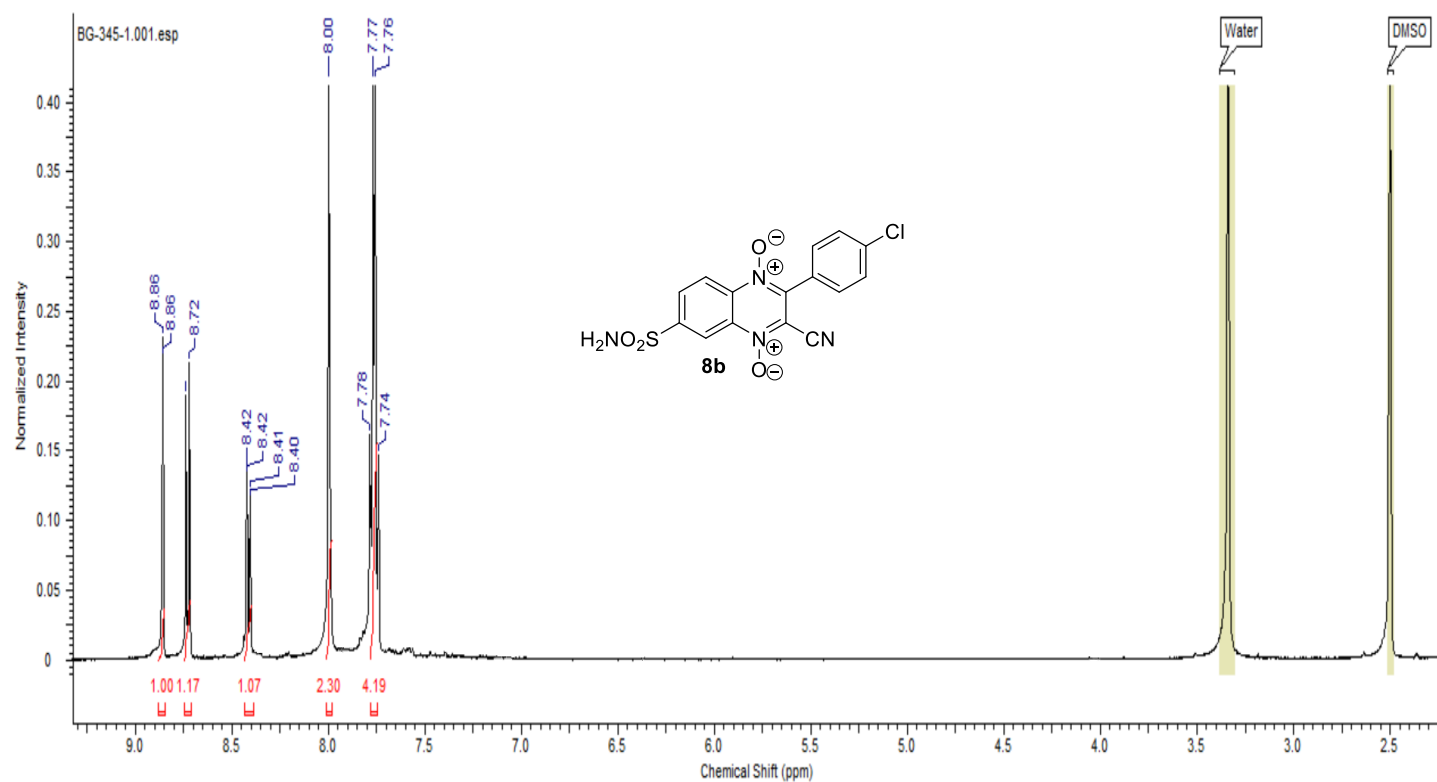

Figure S20. Copy of  $^{13}\text{C}$  NMR spectrum of the derivative **8b**.

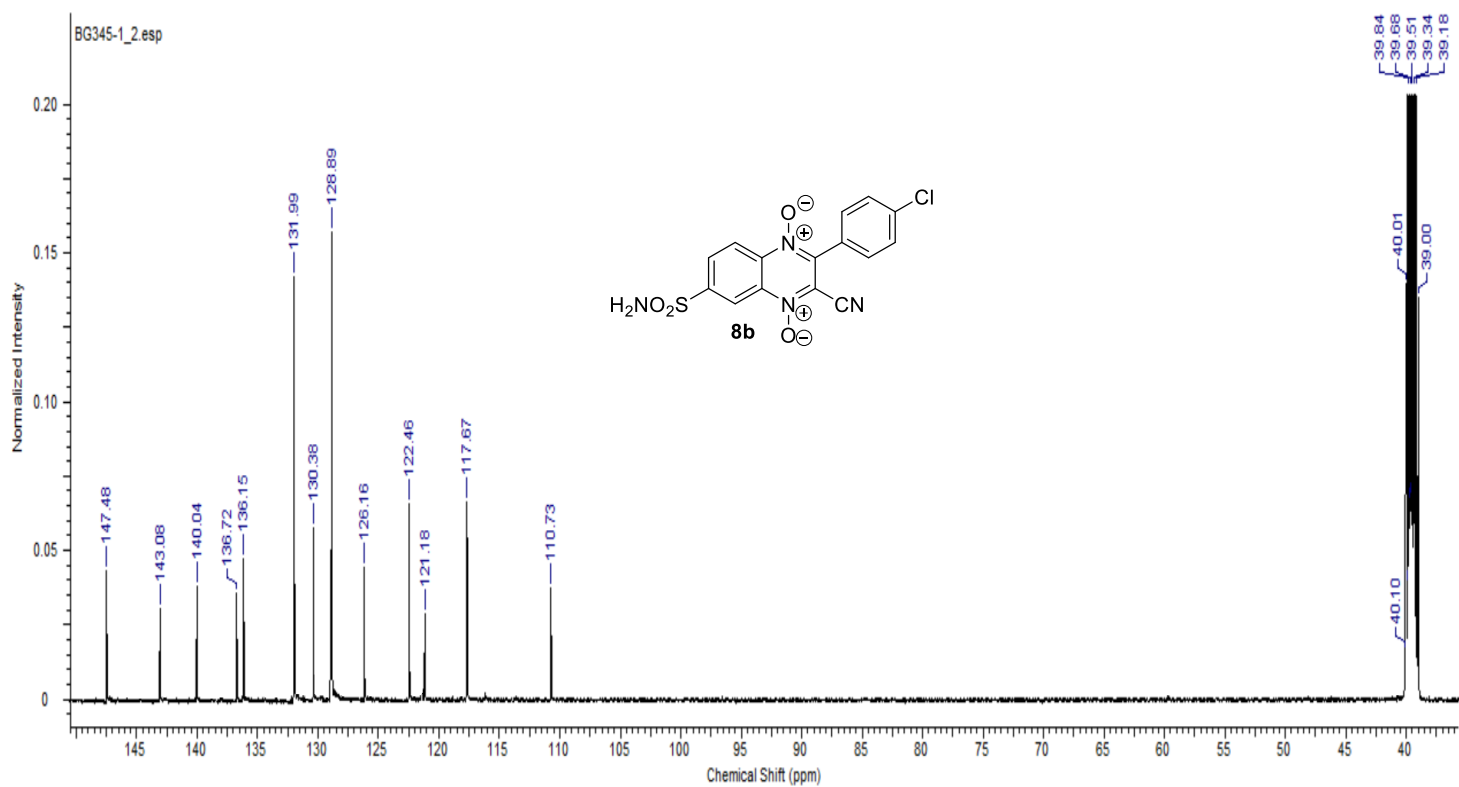

Figure S21. Copy of  $^1\text{H}$  NMR spectrum of the derivative **8c**.

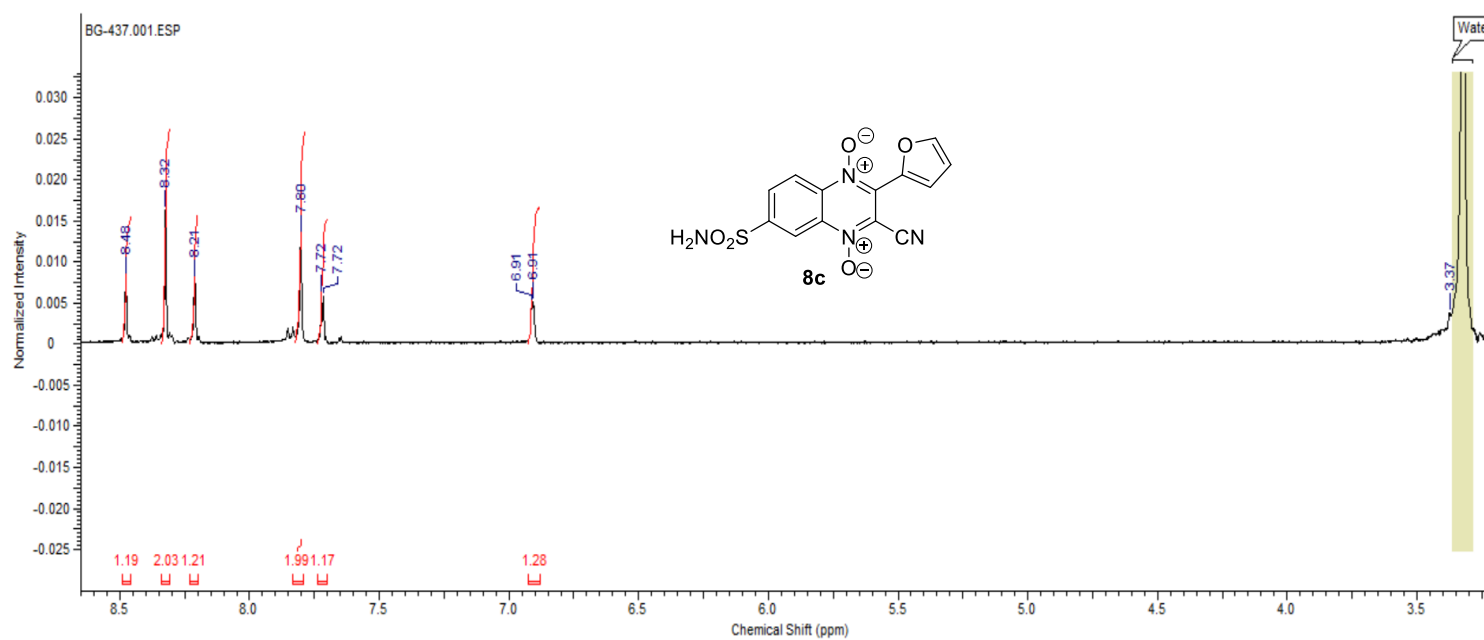

Figure S22. Copy of  $^{13}\text{C}$  NMR spectrum of the derivative **8c**.

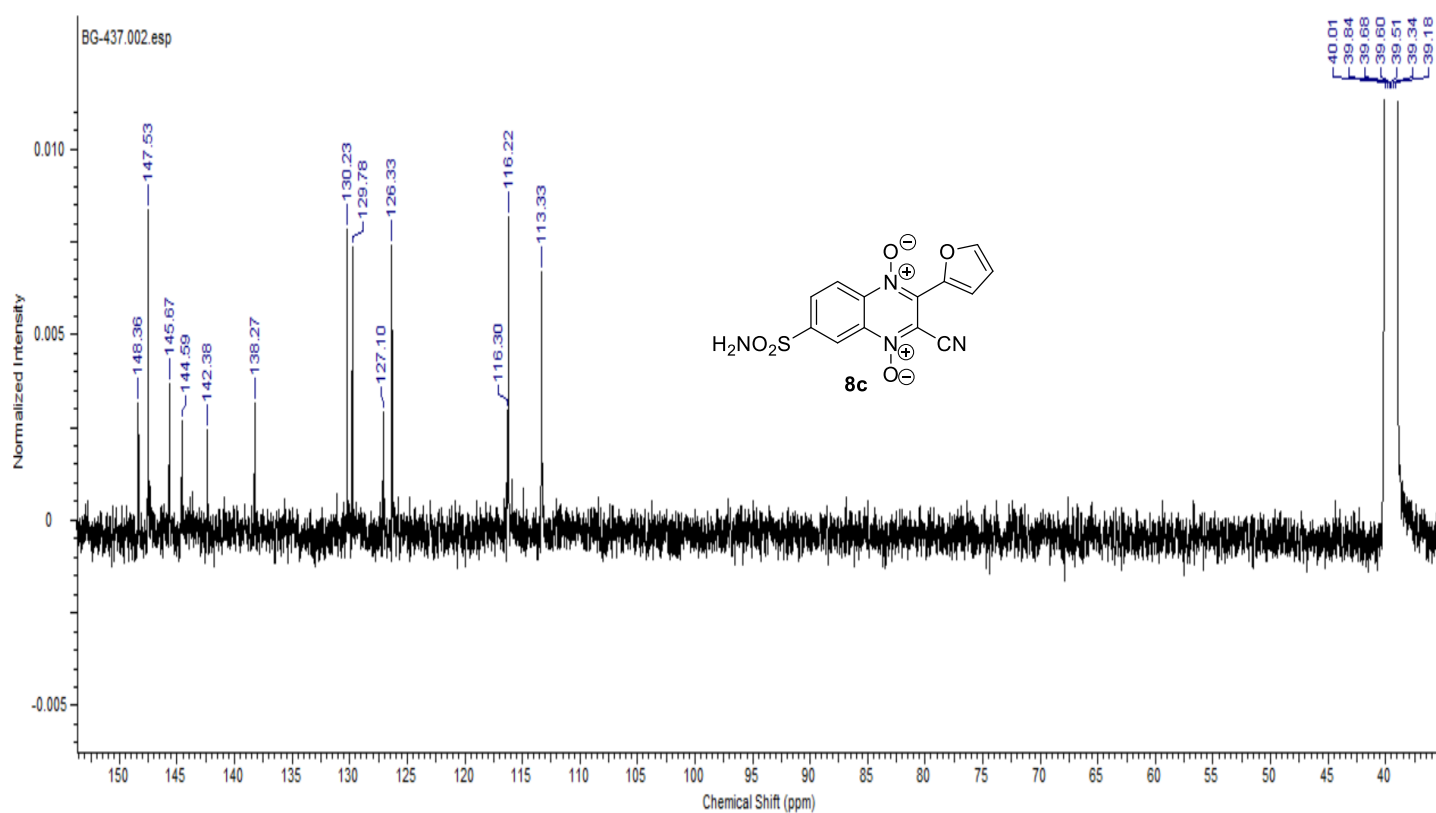

Figure S23. Copy of  $^1\text{H}$  NMR spectrum of the derivative **8g**.

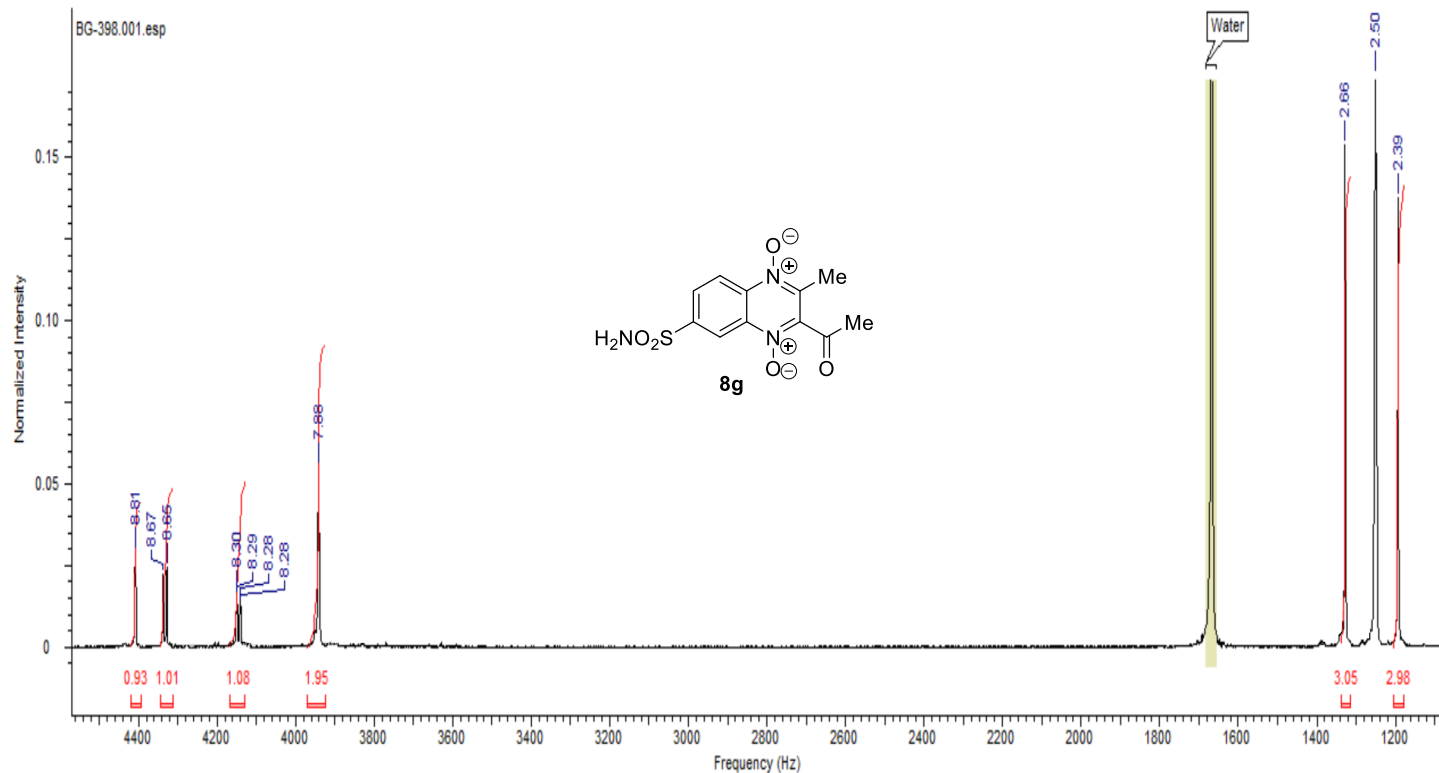

Figure S24. Copy of  $^{13}\text{C}$  NMR spectrum of the derivative **8g**.

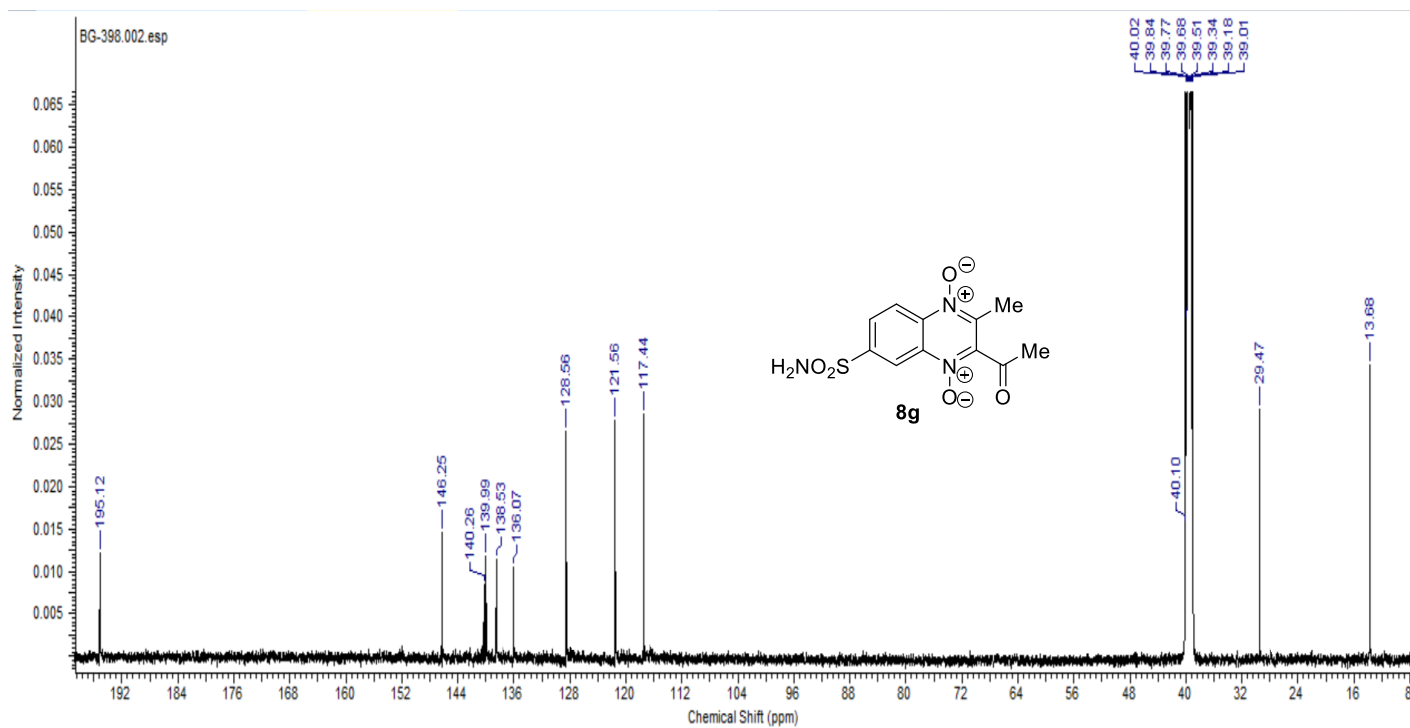

Figure S25. Copy of  $^1\text{H}$  NMR spectrum of the derivative **11**.

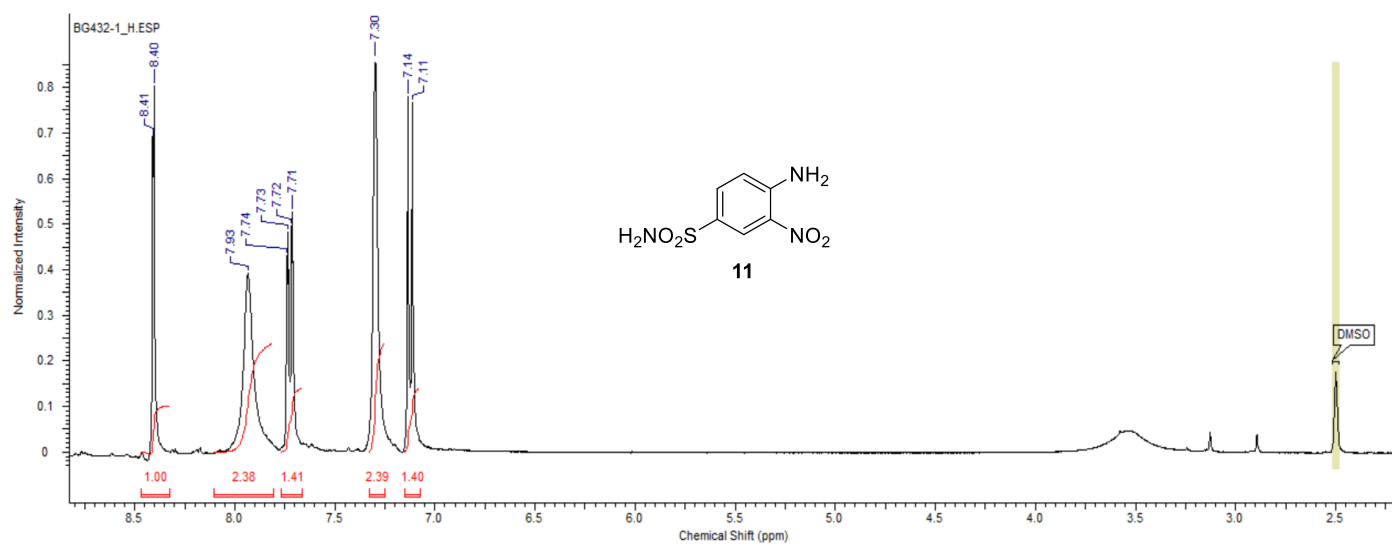

Figure S26. Copy of  $^{13}\text{C}$  NMR spectrum of the derivative **11**.

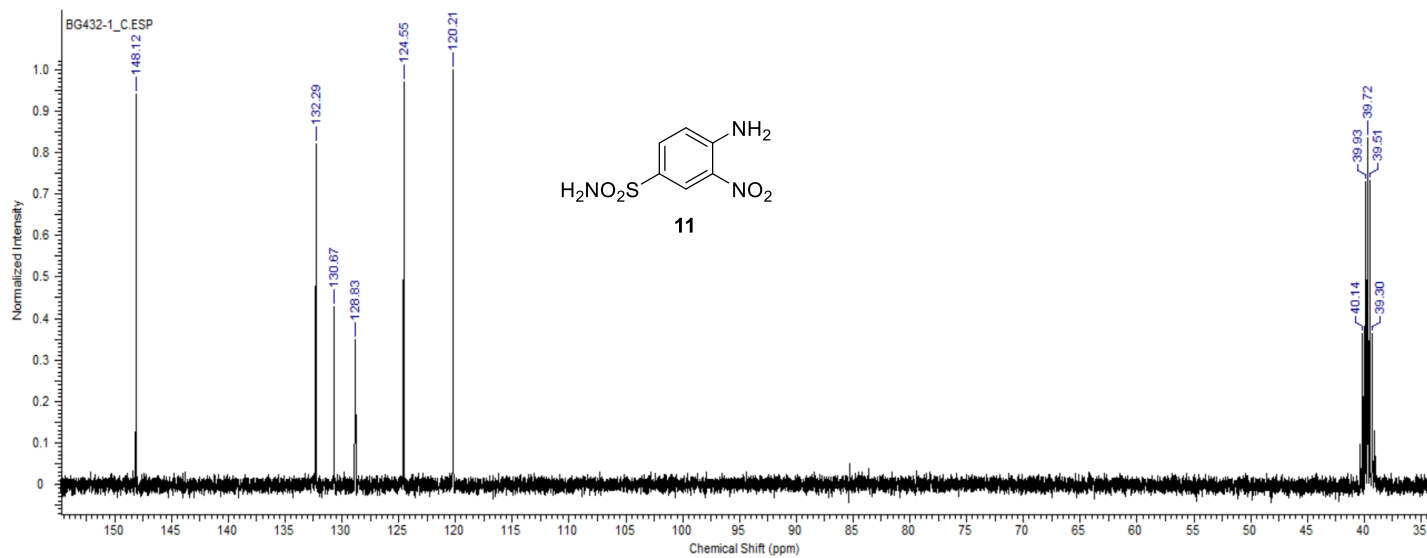

**Figure S27.** Copy of  $^1\text{H}$  NMR spectrum of the derivative **12**.

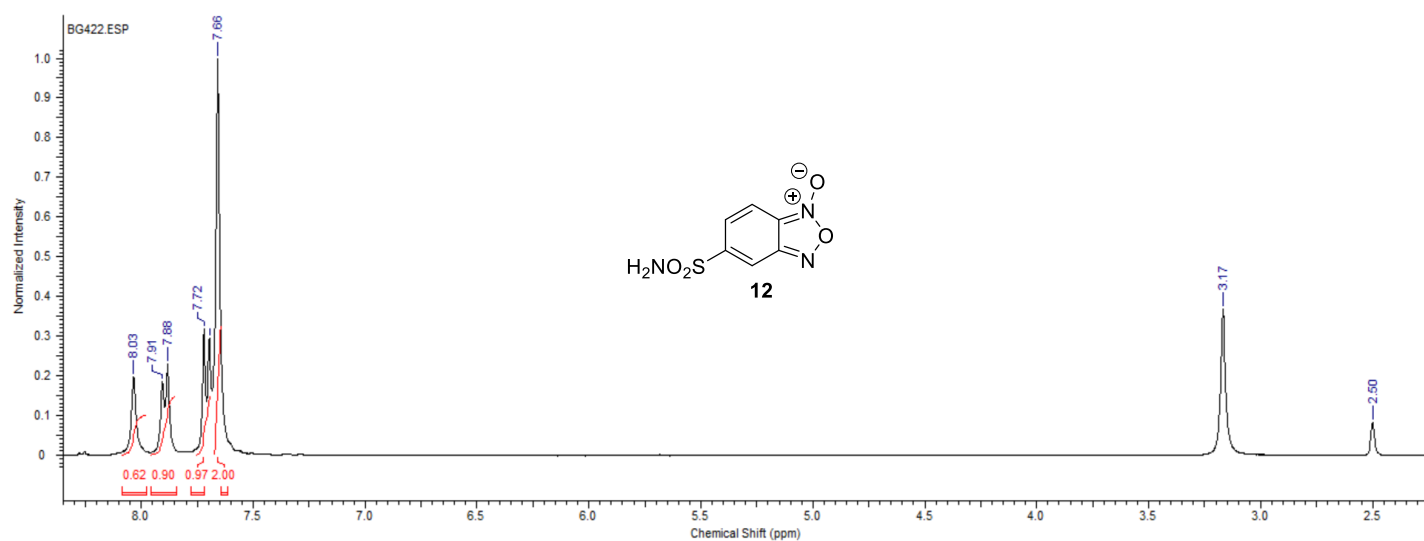

**Figure S28.** Copy of  $^{13}\text{C}$  NMR spectrum of the derivative **12**.

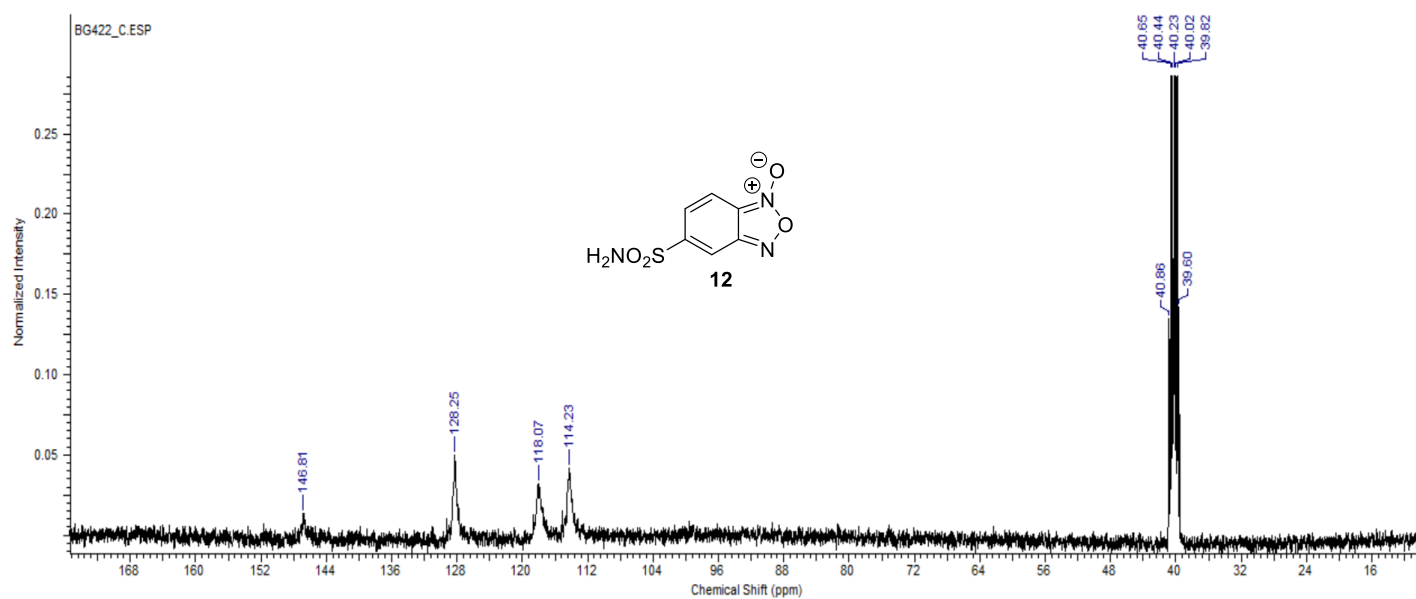

Figure S29. Copy of  $^1\text{H}$  NMR spectrum of the derivative **14**.

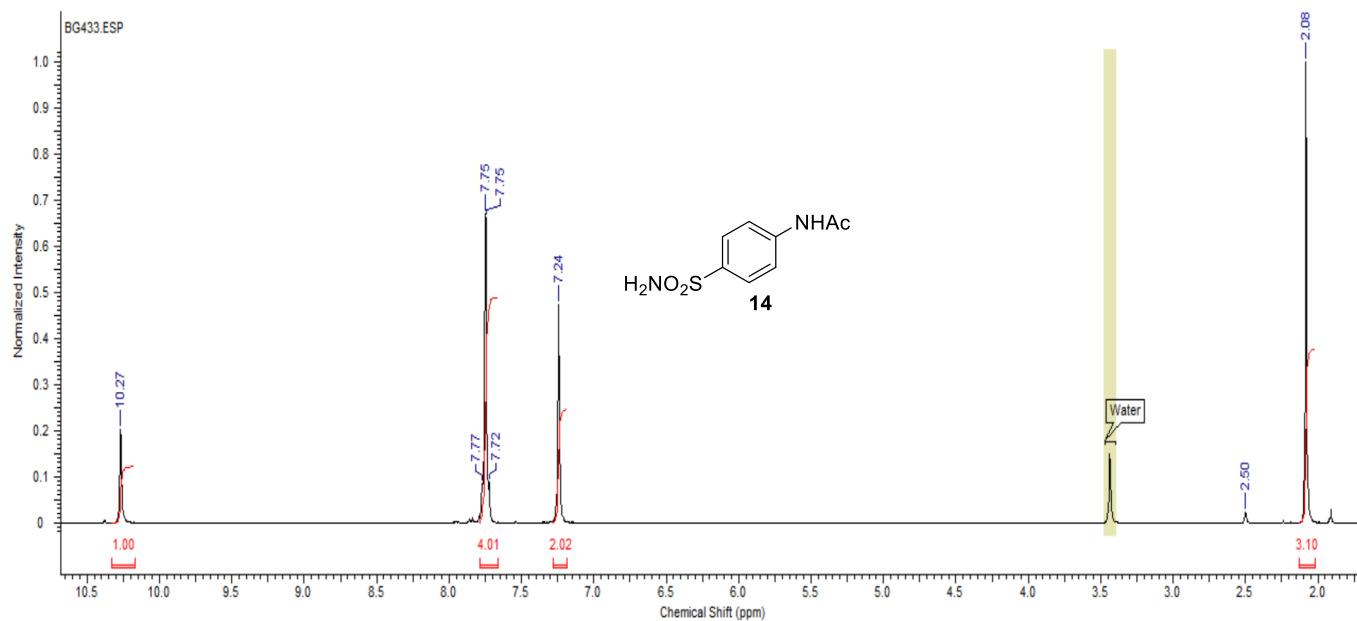

Figure S30. Copy of  $^{13}\text{C}$  NMR spectrum of the derivative **14**.

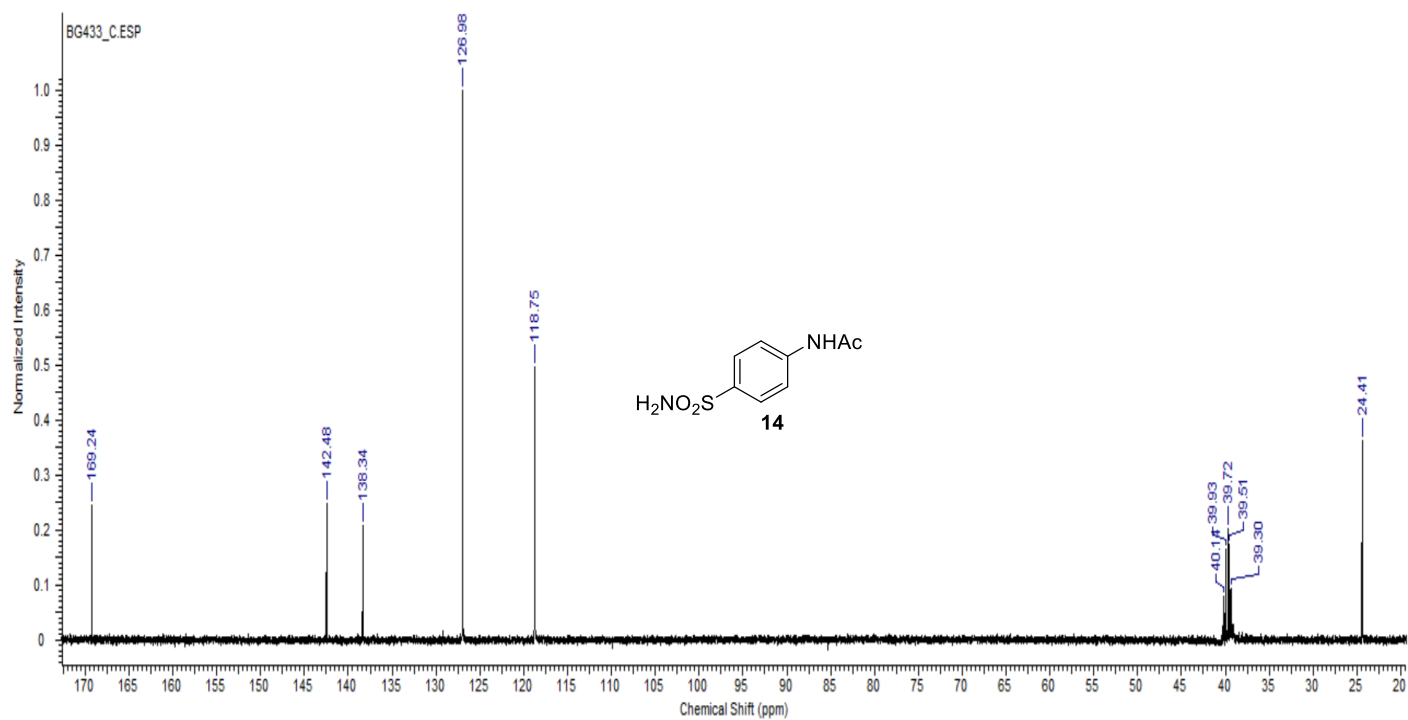



Figure S31. Copy of  $^1\text{H}$  NMR spectrum of the derivative **15**.

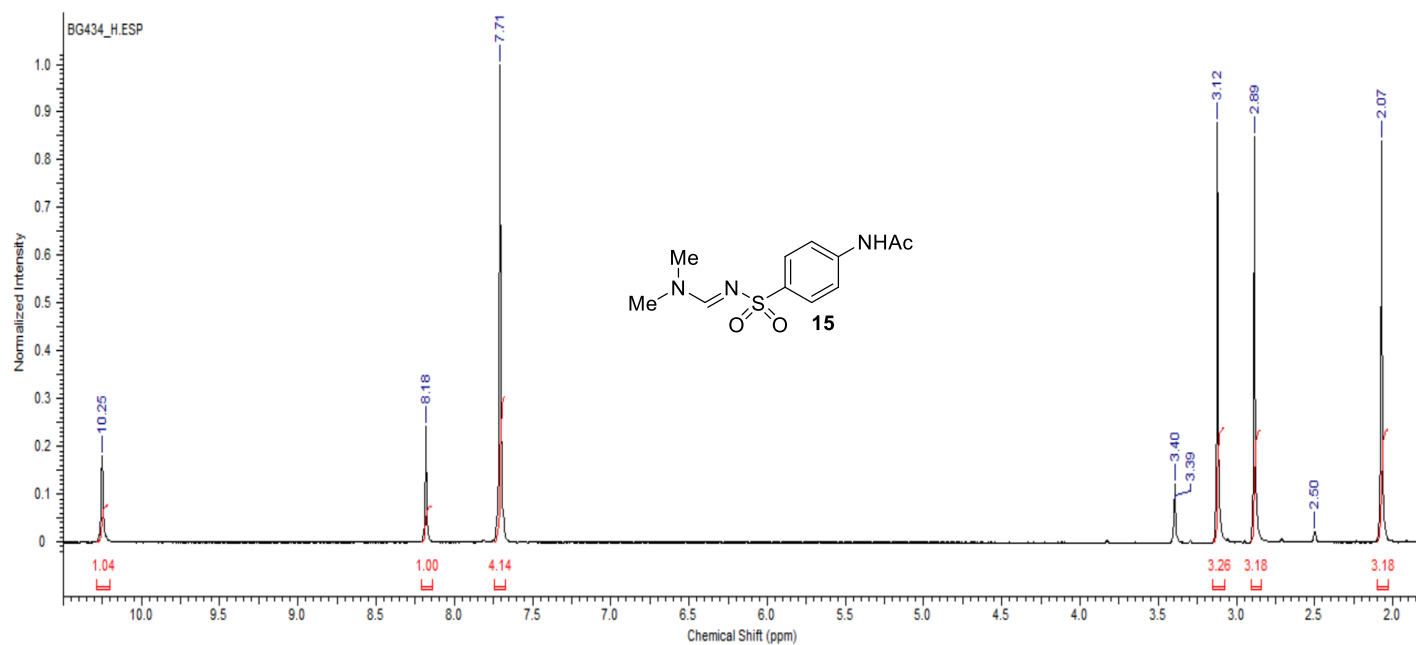

Figure S32. Copy of  $^{13}\text{C}$  NMR spectrum of the derivative **15**.

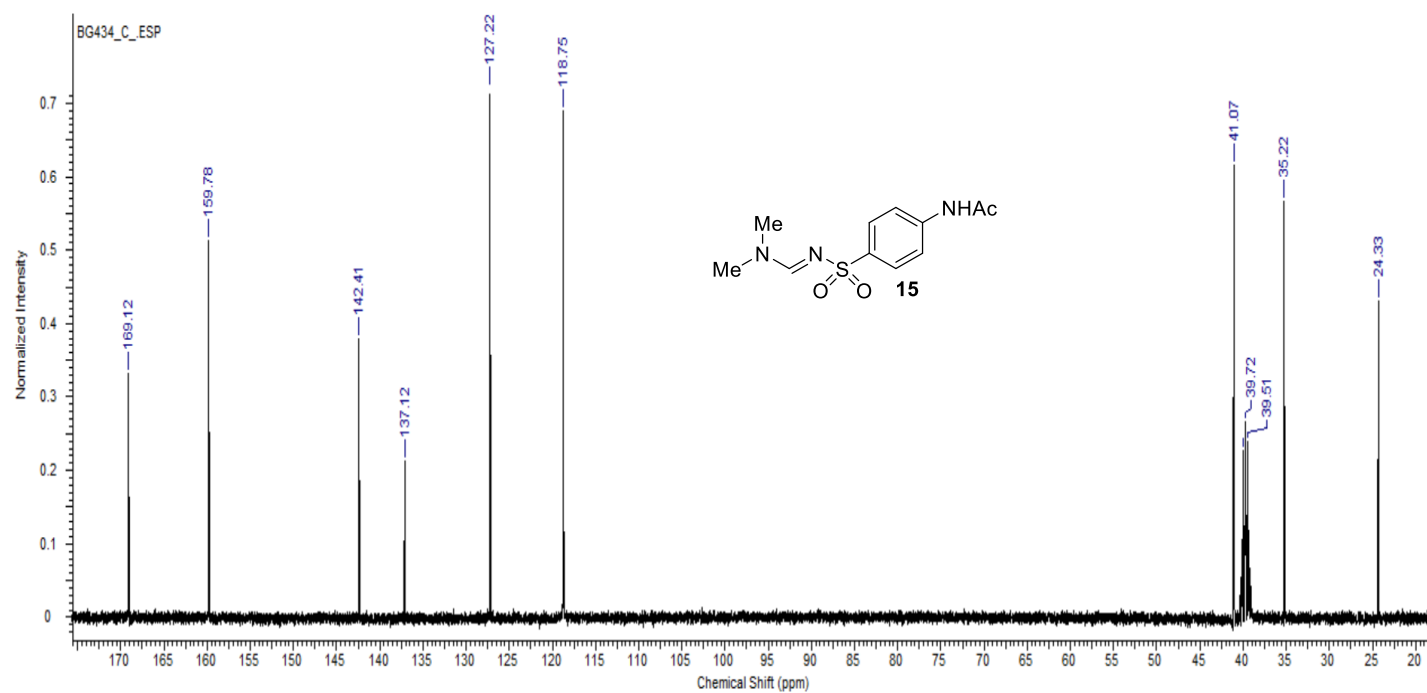

Figure S33. Copy of  $^1\text{H}$  NMR spectrum of the derivative **16**.

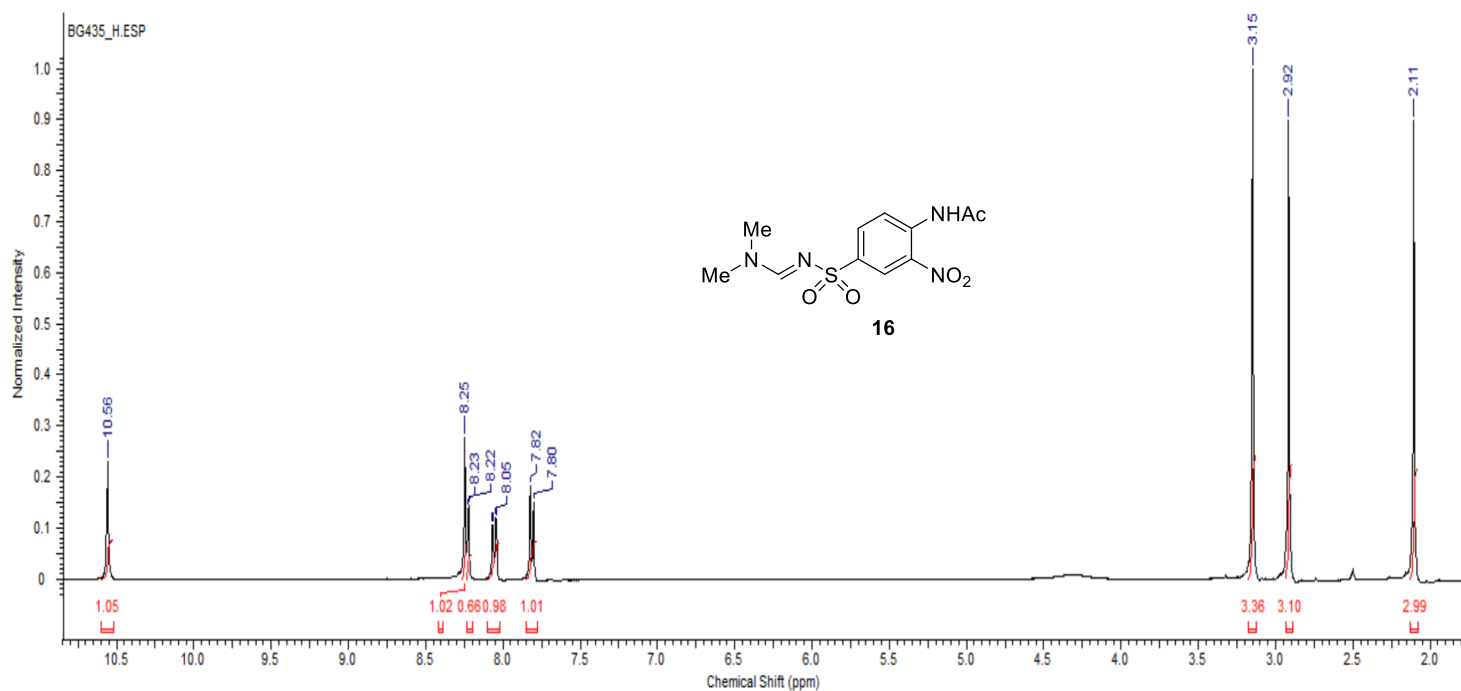

Figure S34. Copy of  $^{13}\text{C}$  NMR spectrum of the derivative **16**.

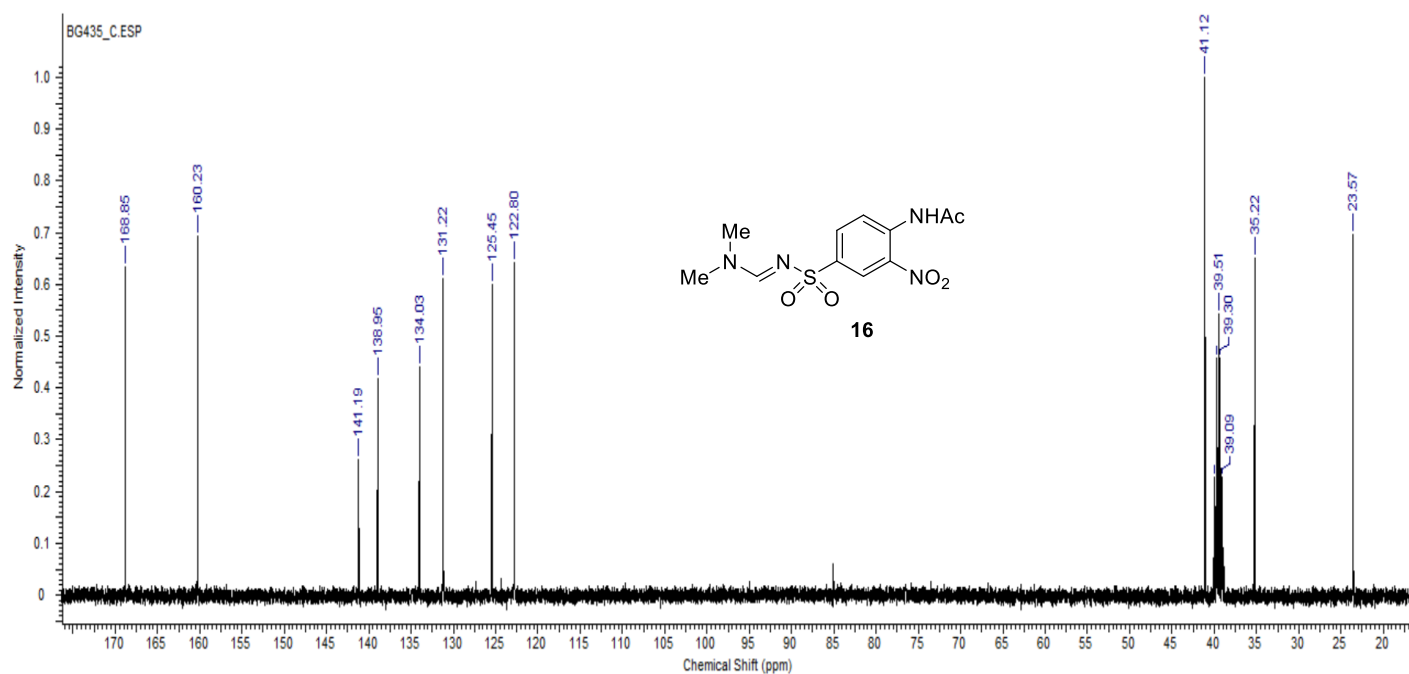

Figure S35. Copy of  $^1\text{H}$  NMR spectrum of the derivative **18**.

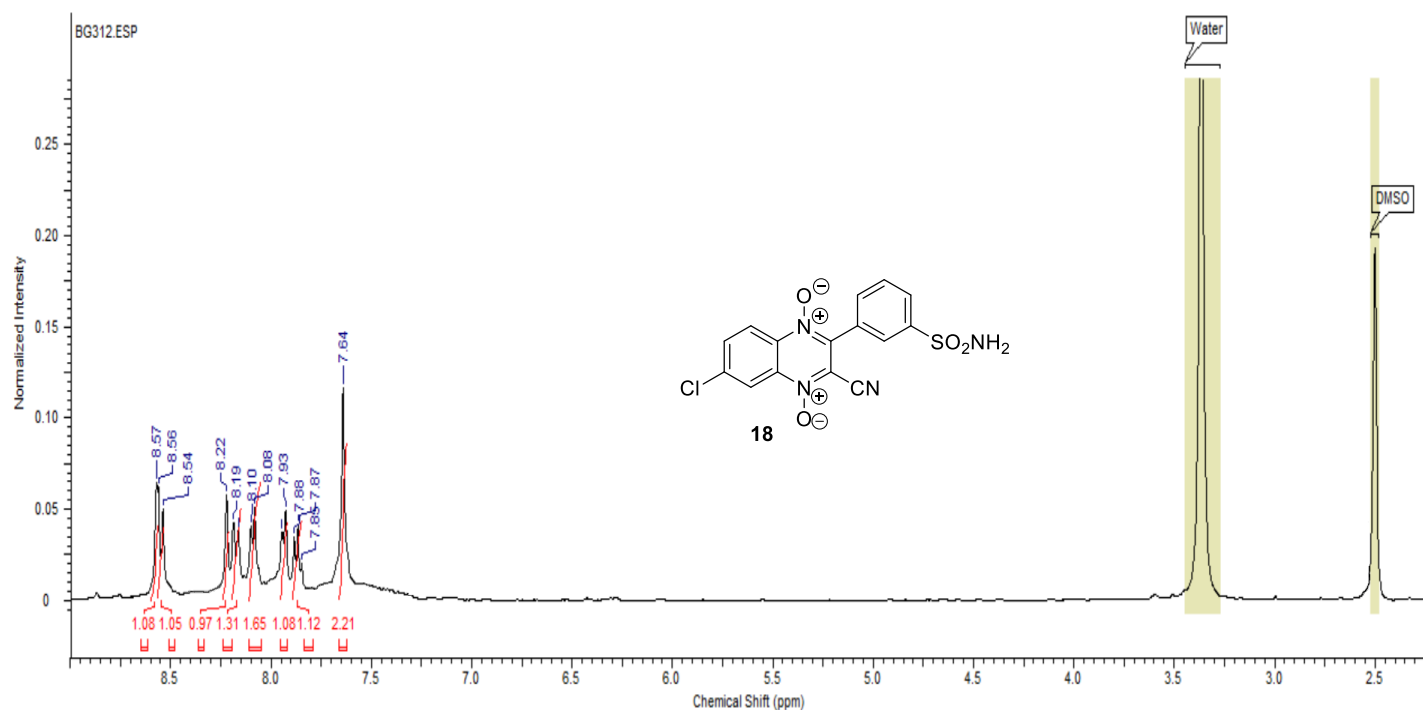

Figure S36. Copy of  $^{13}\text{C}$  NMR spectrum of the derivative **18**.

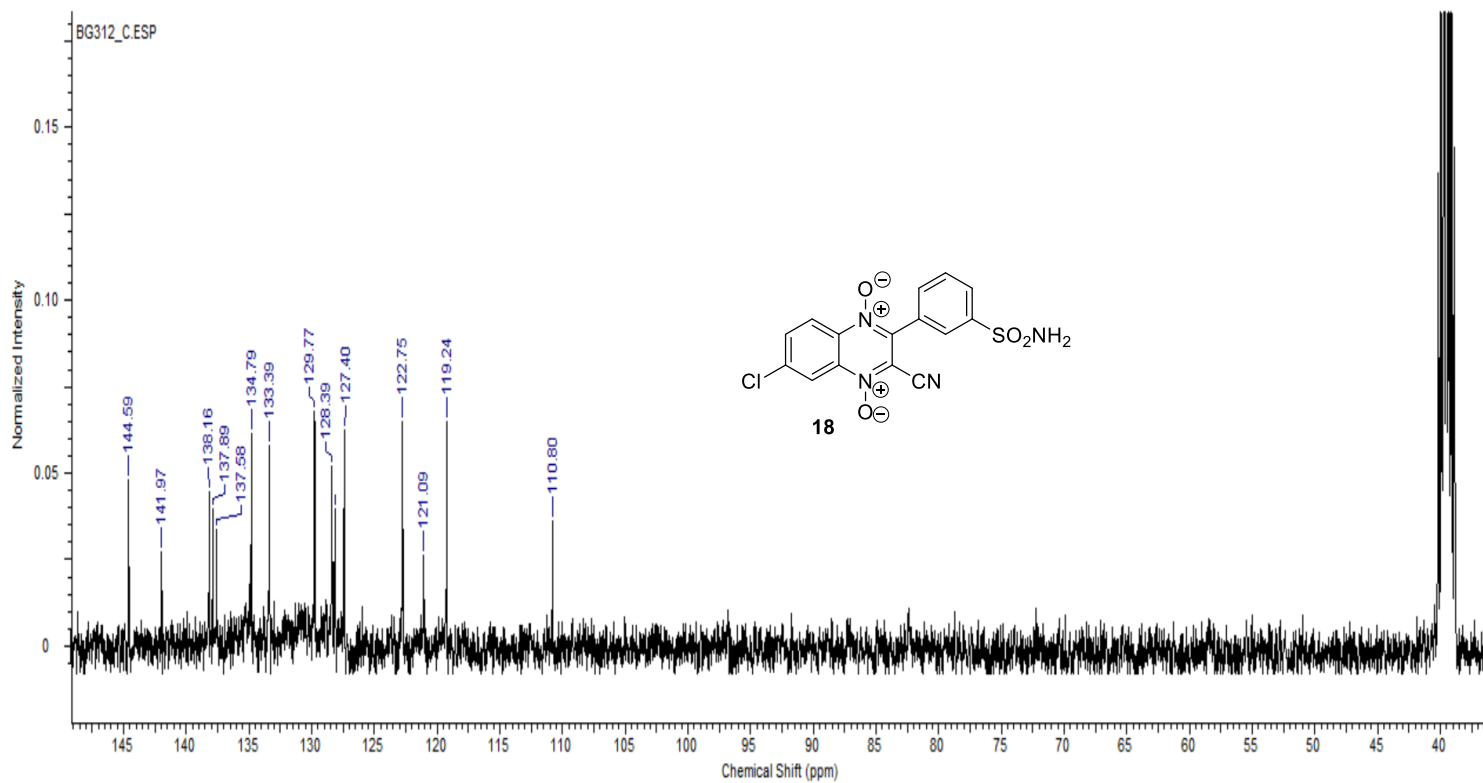

### Copies of HRMS ESI Analysis

Figure S37. Copy of HRMS ESI analysis of the derivatives 7a.

+MS, 0.1-0.3min #(3-17)

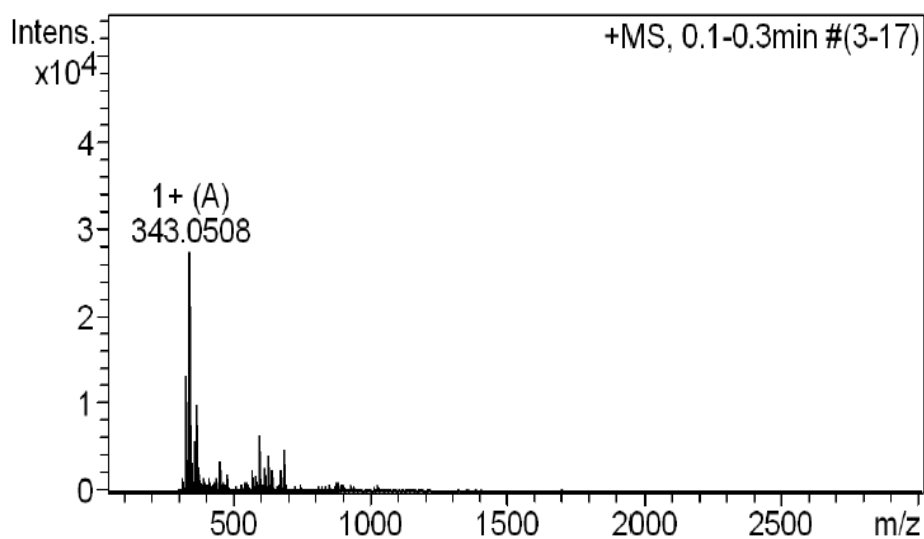

| #  | m/z      | Res.  | S/N   | I     | I %   |
|----|----------|-------|-------|-------|-------|
| 1  | 329.0705 | 12592 | 477.0 | 13290 | 48.5  |
| 2  | 330.0732 | 13818 | 94.6  | 2654  | 9.7   |
| 3  | 343.0508 | 14238 | 920.7 | 27377 | 100.0 |
| 4  | 344.0516 | 11589 | 140.8 | 4212  | 15.4  |
| 5  | 358.3690 | 10931 | 178.5 | 5723  | 20.9  |
| 6  | 369.3820 | 12142 | 297.6 | 10027 | 36.6  |
| 7  | 451.2188 | 13411 | 70.8  | 3272  | 12.0  |
| 8  | 596.5999 | 14650 | 105.7 | 6469  | 23.6  |
| 9  | 624.6326 | 14744 | 64.9  | 4051  | 14.8  |
| 10 | 685.0901 | 13506 | 73.5  | 4731  | 17.3  |

Figure S38. Copy of HRMS ESI analysis of the derivatives 7b.

**-MS, 0.0-0.1min #(2-6)**

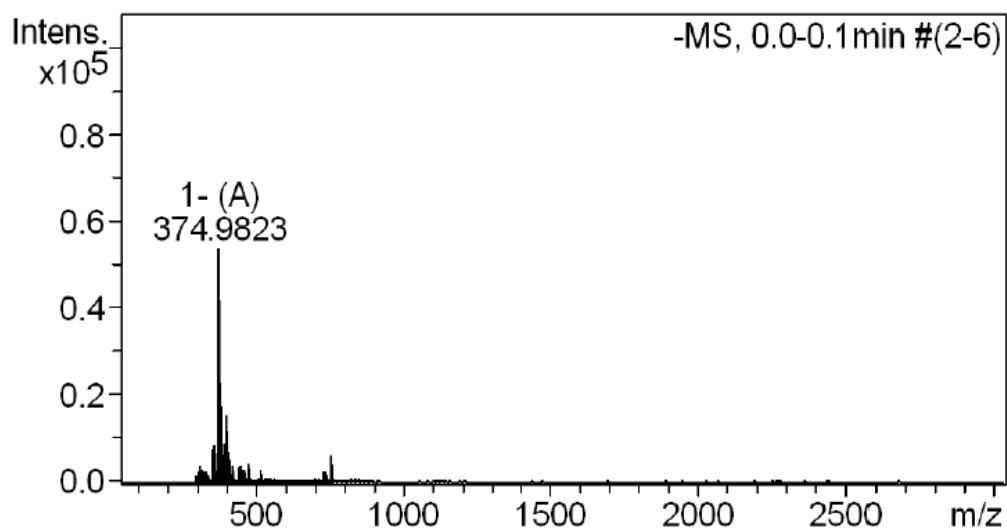

| # | m/z      | Res. | S/N | I     | I%    |
|---|----------|------|-----|-------|-------|
| 1 | 349.9889 |      |     | 7572  | 14.1  |
| 2 | 358.9898 |      |     | 8557  | 16.0  |
| 3 | 374.9822 |      |     | 53590 | 100.0 |
| 4 | 376.9794 |      |     | 22863 | 42.7  |
| 5 | 382.0024 |      |     | 5517  | 10.3  |
| 6 | 392.9910 |      |     | 8656  | 16.2  |
| 7 | 401.9959 |      |     | 15125 | 28.2  |
| 8 | 403.9858 |      |     | 7196  | 13.4  |
| 9 | 750.9739 |      |     | 5951  | 11.1  |

Figure S39. Copy of HRMS ESI analysis of the derivatives 7c.

+MS, 0.0-0.2min #(2-13)

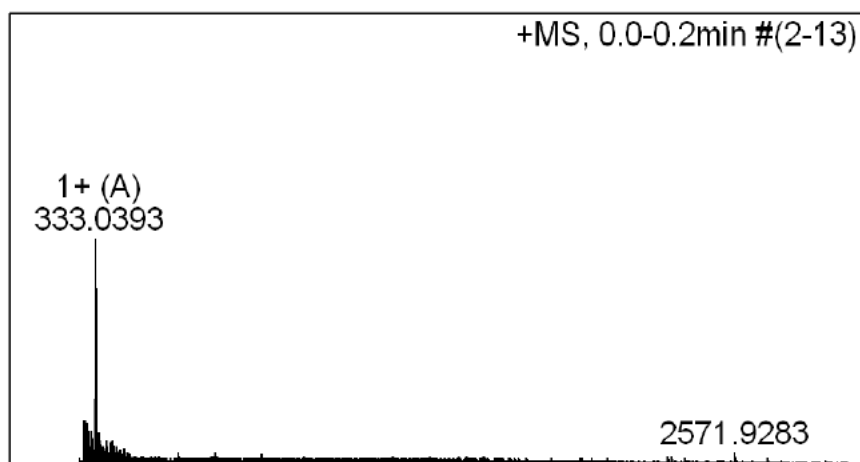

| # | m/z      | Res. | S/N | I     | I %   |
|---|----------|------|-----|-------|-------|
| 1 | 301.0405 |      |     | 2756  | 14.3  |
| 2 | 317.0633 |      |     | 3477  | 18.1  |
| 3 | 333.0393 |      |     | 19225 | 100.0 |
| 4 | 342.0657 |      |     | 3007  | 15.6  |
| 5 | 344.0780 |      |     | 6008  | 31.3  |
| 6 | 360.0810 |      |     | 2626  | 13.7  |
| 7 | 384.1094 |      |     | 2028  | 10.5  |
| 8 | 403.1100 |      |     | 1976  | 10.3  |

**Figure S40.** Copy of HRMS ESI analysis of the derivatives **7d**.

**+MS, 0.0-0.2min #(2-10)**

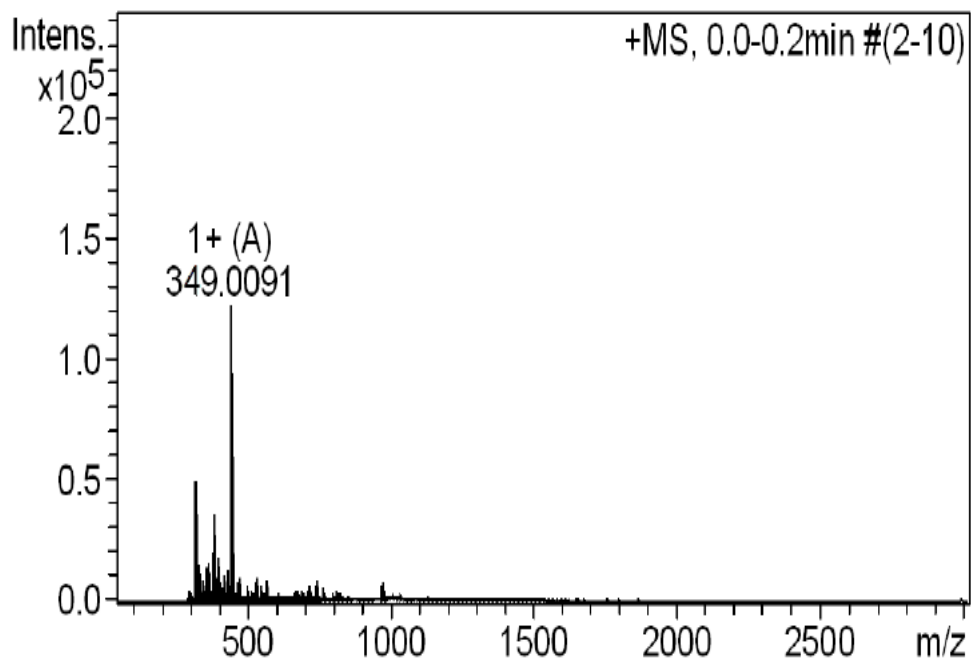

| #  | m/z      | Res. | S/N    | I      | I%    |
|----|----------|------|--------|--------|-------|
| 1  | 317.0152 | 6204 | 125.6  | 16002  | 13.2  |
| 2  | 318.0231 | 6084 | 323.2  | 35582  | 29.3  |
| 3  | 319.0204 | 5818 | 160.4  | 17803  | 14.7  |
| 4  | 333.0476 | 6045 | 120.9  | 14461  | 11.9  |
| 5  | 349.0091 | 5952 | 1111.6 | 121459 | 100.0 |
| 6  | 380.1998 | 5980 | 153.0  | 19904  | 16.4  |
| 7  | 383.2063 | 6162 | 275.5  | 35777  | 29.5  |
| 8  | 399.1810 | 6139 | 133.2  | 17756  | 14.6  |
| 9  | 445.1771 | 6289 | 575.8  | 79637  | 65.6  |
| 10 | 446.1793 | 6453 | 126.1  | 17786  | 14.6  |

**Figure S41.** Copy of HRMS ESI analysis of the derivatives **7e**.

**+MS, 0.0-0.1min #(2-7)**

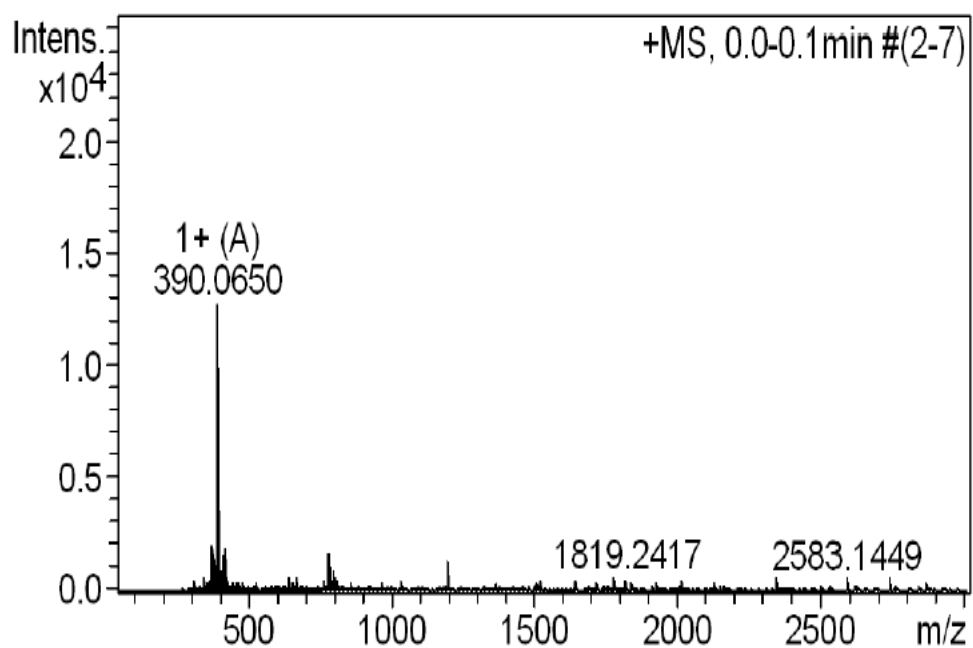

| # | m/z      | Res. | S/N | I     | I%    |
|---|----------|------|-----|-------|-------|
| 1 | 374.0714 |      |     | 1939  | 15.2  |
| 2 | 390.0649 |      |     | 12731 | 100.0 |
| 3 | 392.0737 |      |     | 4024  | 31.6  |
| 4 | 409.1039 |      |     | 1579  | 12.4  |
| 5 | 412.0477 |      |     | 1372  | 10.8  |
| 6 | 779.1266 |      |     | 1620  | 12.7  |
| 7 | 781.1349 |      |     | 1610  | 12.6  |



**Figure S42.** Copy of HRMS ESI analysis of the derivatives **7f**.

**+MS, 0.0-0.3min #(2-15)**

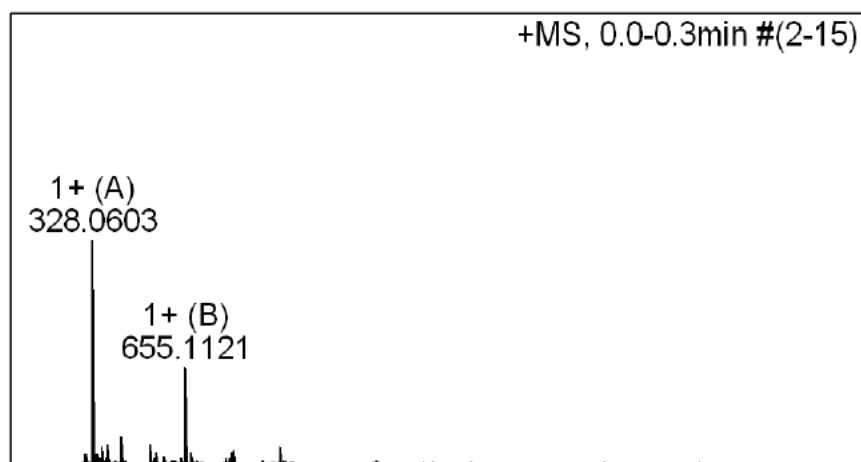

| #  | m/z      | Res. | S/N    | I      | I%    |
|----|----------|------|--------|--------|-------|
| 1  | 328.0603 | 5814 | 3401.6 | 741290 | 100.0 |
| 2  | 329.0631 | 6243 | 514.2  | 112606 | 15.2  |
| 3  | 361.2220 | 6018 | 244.8  | 56907  | 7.7   |
| 4  | 381.2971 | 6615 | 251.0  | 58908  | 7.9   |
| 5  | 383.2010 | 6507 | 262.9  | 61743  | 8.3   |
| 6  | 431.1621 | 6652 | 363.4  | 87290  | 11.8  |
| 7  | 531.2155 | 6832 | 250.4  | 63087  | 8.5   |
| 8  | 655.1121 | 7233 | 1196.8 | 322891 | 43.6  |
| 9  | 656.1158 | 7503 | 354.4  | 95995  | 12.9  |
| 10 | 982.1678 | 7493 | 289.5  | 60284  | 8.1   |

**Figure S43.** Copy of HRMS ESI analysis of the derivatives **7g**.

**+MS, 0.1-0.4min #(5-21)**

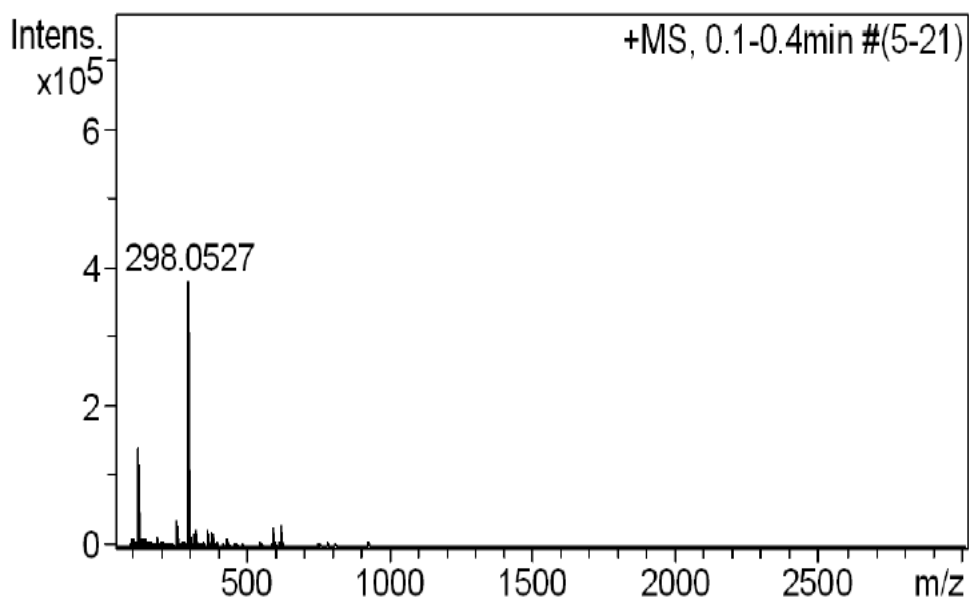

| #  | m/z      | I      | I%    |
|----|----------|--------|-------|
| 1  | 118.0914 | 140718 | 36.9  |
| 2  | 258.1751 | 36295  | 9.5   |
| 3  | 259.1601 | 22030  | 5.8   |
| 4  | 298.0527 | 381462 | 100.0 |
| 5  | 299.0533 | 50586  | 13.3  |
| 6  | 322.0487 | 22802  | 6.0   |
| 7  | 361.2221 | 23378  | 6.1   |
| 8  | 375.2048 | 21375  | 5.6   |
| 9  | 595.0901 | 25279  | 6.6   |
| 10 | 622.0265 | 30286  | 7.9   |

Figure S44. Copy of HRMS ESI analysis of the derivatives 7h.

+MS, 0.2-0.3min #(10-18)

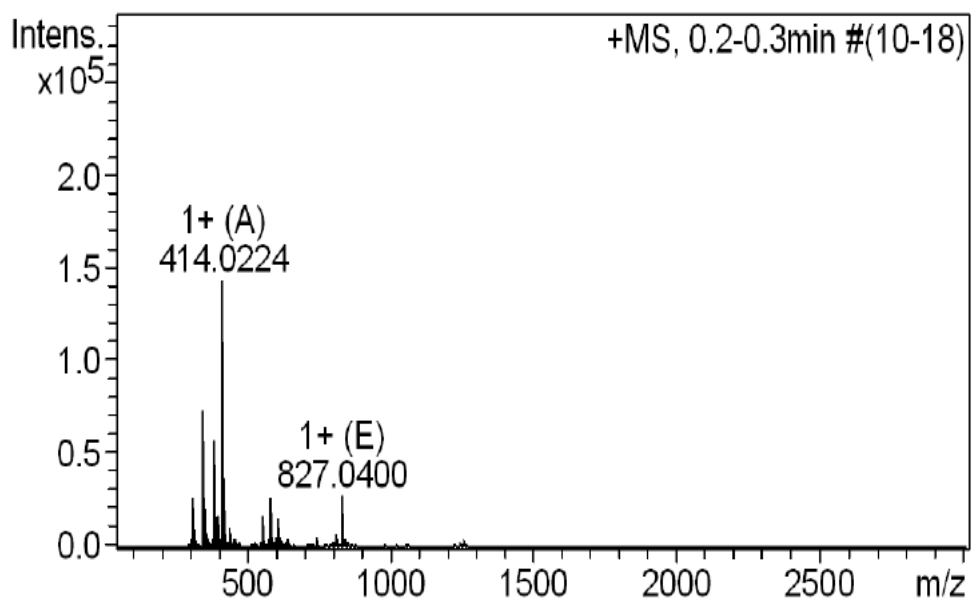

| #  | m/z      | Res.  | S/N    | I      | I%    |
|----|----------|-------|--------|--------|-------|
| 1  | 313.2609 | 9994  | 463.0  | 25806  | 18.1  |
| 2  | 341.2925 | 10413 | 1136.6 | 73271  | 51.3  |
| 3  | 353.2514 | 9670  | 386.2  | 26281  | 18.4  |
| 4  | 381.2827 | 10062 | 503.9  | 38484  | 27.0  |
| 5  | 383.1890 | 11025 | 737.3  | 56707  | 39.7  |
| 6  | 414.0224 | 11537 | 1658.9 | 142744 | 100.0 |
| 7  | 415.0226 | 9690  | 298.7  | 25820  | 18.1  |
| 8  | 551.4819 | 11483 | 127.2  | 15718  | 11.0  |
| 9  | 579.5142 | 9492  | 213.5  | 26375  | 18.5  |
| 10 | 827.0400 | 10153 | 246.7  | 26917  | 18.9  |

Figure S45. Copy of HRMS ESI analysis of the derivatives **8a**.

**+MS, 0.0-0.3min #(2-15)**

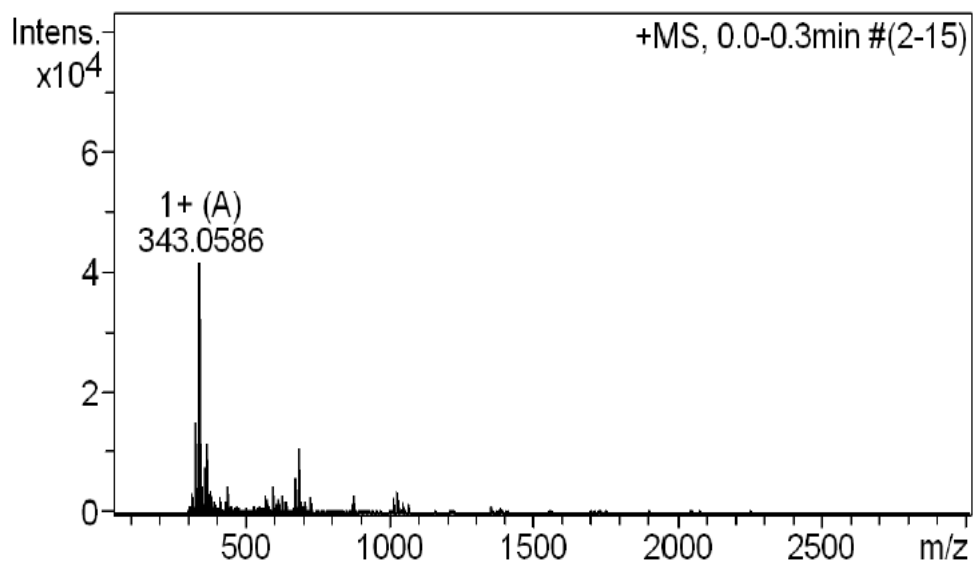

| #  | m/z      | Res.  | S/N   | I     | I %   |
|----|----------|-------|-------|-------|-------|
| 1  | 329.0791 | 12056 | 372.0 | 14917 | 35.9  |
| 2  | 343.0586 | 16289 | 979.2 | 41543 | 100.0 |
| 3  | 344.0603 | 11036 | 133.4 | 5687  | 13.7  |
| 4  | 358.3774 | 11949 | 168.5 | 7461  | 18.0  |
| 5  | 369.3900 | 12943 | 250.4 | 11403 | 27.4  |
| 6  | 440.0421 | 14433 | 78.0  | 4209  | 10.1  |
| 7  | 596.6007 | 14172 | 63.4  | 4264  | 10.3  |
| 8  | 671.1166 | 14659 | 84.0  | 5794  | 13.9  |
| 9  | 685.0957 | 12447 | 155.8 | 10762 | 25.9  |
| 10 | 686.0957 | 13567 | 66.9  | 4648  | 11.2  |

**Figure S46.** Copy of HRMS ESI analysis of the derivatives **8b**.

**+MS, 0.0-0.1min #(2-6)**

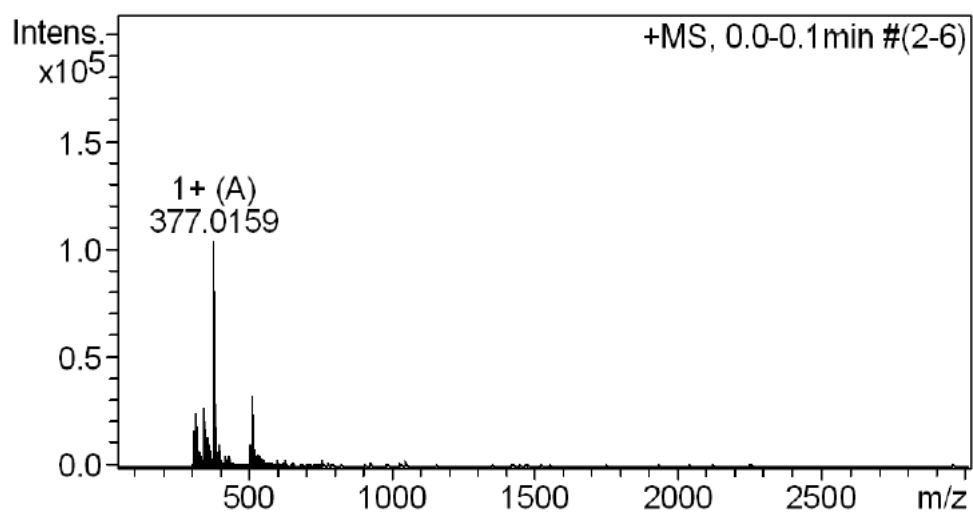

| #  | m/z      | Res. | S/N    | I      | I %   |
|----|----------|------|--------|--------|-------|
| 1  | 313.2783 | 5924 | 187.6  | 15879  | 15.3  |
| 2  | 318.1647 | 5824 | 279.1  | 24132  | 23.2  |
| 3  | 341.3097 | 6173 | 278.0  | 26516  | 25.5  |
| 4  | 353.2705 | 5946 | 176.0  | 17107  | 16.4  |
| 5  | 377.0159 | 5922 | 1037.7 | 104014 | 100.0 |
| 6  | 378.0187 | 6047 | 195.5  | 19689  | 18.9  |
| 7  | 379.0139 | 6084 | 393.5  | 39609  | 38.1  |
| 8  | 381.3026 | 6374 | 226.9  | 22942  | 22.1  |
| 9  | 513.7862 | 6418 | 272.2  | 32629  | 31.4  |
| 10 | 514.2872 | 6759 | 175.4  | 21100  | 20.3  |

**Figure S47.** Copy of HRMS ESI analysis of the derivatives **8c**.

**-MS, 0.0-0.2min #(2-13)**

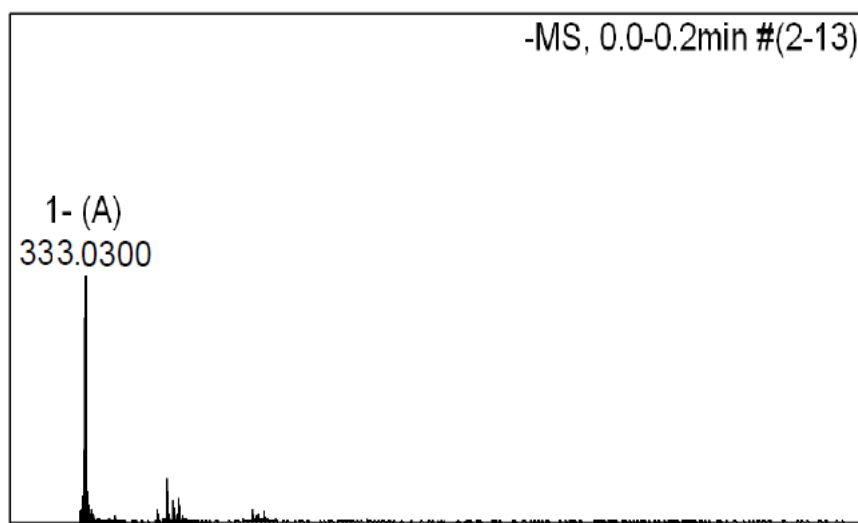

| #  | m/z      | Res. | S/N    | I     | I%    |
|----|----------|------|--------|-------|-------|
| 1  | 299.0126 | 5155 | 55.1   | 4632  | 5.7   |
| 2  | 300.0150 | 5279 | 226.7  | 15650 | 19.1  |
| 3  | 301.0118 | 5276 | 95.7   | 6663  | 8.2   |
| 4  | 315.0055 | 5579 | 484.4  | 36424 | 44.6  |
| 5  | 316.0097 | 5350 | 96.9   | 7351  | 9.0   |
| 6  | 333.0300 | 5153 | 1193.0 | 81747 | 100.0 |
| 7  | 599.9871 | 6032 | 189.8  | 14429 | 17.7  |
| 8  | 600.0330 | 6136 | 63.3   | 4854  | 5.9   |
| 9  | 615.0251 | 6076 | 90.7   | 6959  | 8.5   |
| 10 | 635.0059 | 6196 | 99.4   | 7670  | 9.4   |

**Figure S48.** Copy of HRMS ESI analysis of the derivatives **8g**.

**+MS, 0.0-0.2min #(2-9)**

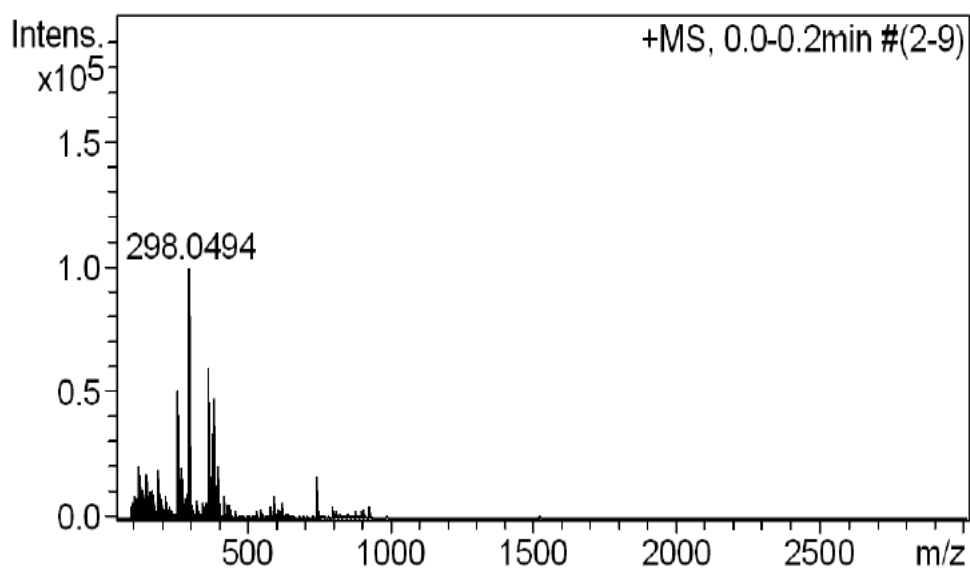

| #  | m/z      | I     | I %   |
|----|----------|-------|-------|
| 1  | 124.0860 | 20819 | 20.9  |
| 2  | 151.0983 | 17013 | 17.1  |
| 3  | 185.0809 | 18874 | 18.9  |
| 4  | 259.1549 | 50464 | 50.6  |
| 5  | 271.0741 | 19744 | 19.8  |
| 6  | 298.0494 | 99759 | 100.0 |
| 7  | 361.2218 | 59597 | 59.7  |
| 8  | 378.2452 | 33863 | 33.9  |
| 9  | 383.2010 | 47091 | 47.2  |
| 10 | 399.1773 | 20477 | 20.5  |

**Figure S49.** Copy of HRMS ESI analysis of the derivatives **11**.

**-MS, 0.1-0.2min #(3-14)**

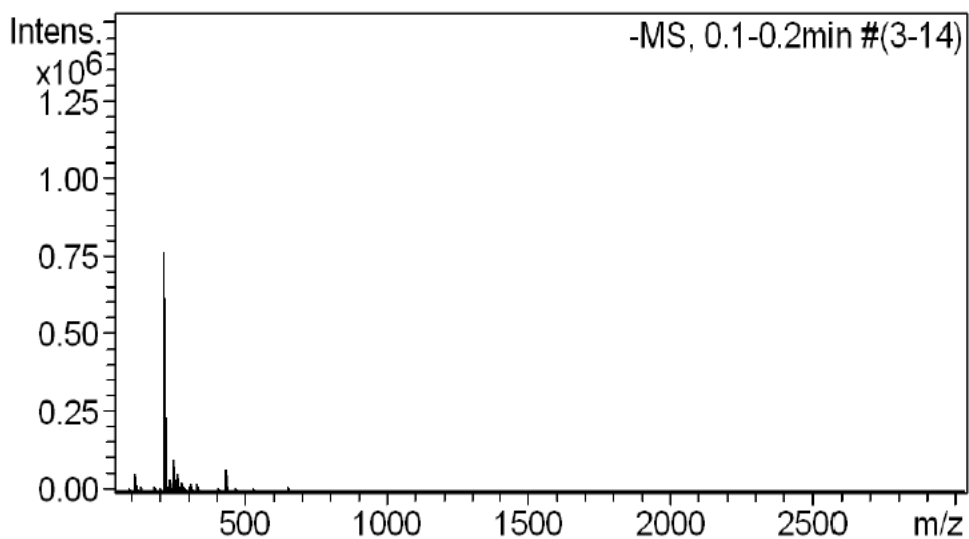

| #  | m/z      | I      | I %   |
|----|----------|--------|-------|
| 1  | 112.9850 | 55290  | 7.3   |
| 2  | 216.0066 | 759951 | 100.0 |
| 3  | 217.0043 | 66918  | 8.8   |
| 4  | 218.0030 | 36987  | 4.9   |
| 5  | 234.9553 | 36526  | 4.8   |
| 6  | 251.9816 | 96791  | 12.7  |
| 7  | 253.9783 | 38981  | 5.1   |
| 8  | 260.9904 | 50465  | 6.6   |
| 9  | 279.9405 | 29199  | 3.8   |
| 10 | 433.0156 | 66905  | 8.8   |



**Figure S50.** Copy of HRMS ESI analysis of the derivatives **12**.

**-MS, 0.1-0.1min #(3-8)**

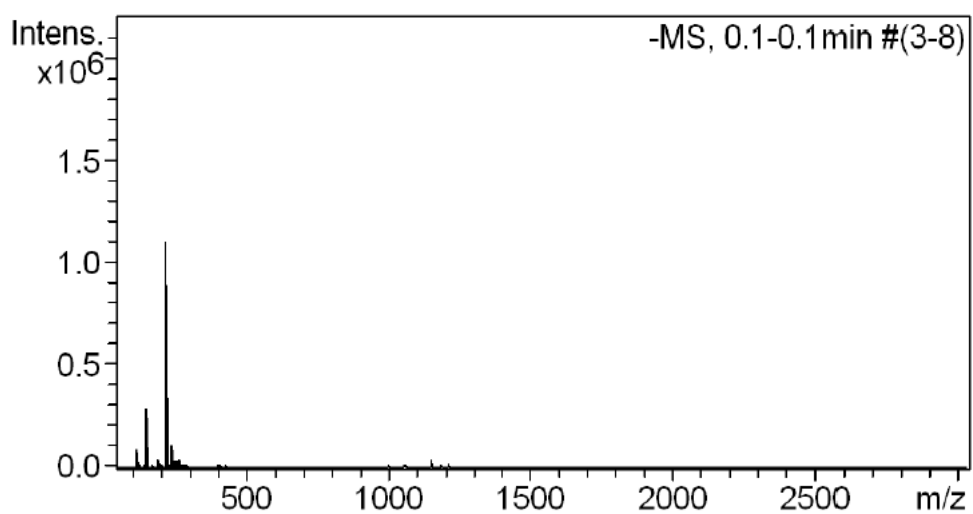

| #  | m/z      | I       | I %   |
|----|----------|---------|-------|
| 1  | 112.9716 | 88404   | 8.0   |
| 2  | 150.0154 | 286559  | 26.1  |
| 3  | 189.9551 | 42609   | 3.9   |
| 4  | 213.9739 | 85688   | 7.8   |
| 5  | 214.9763 | 150360  | 13.7  |
| 6  | 216.0085 | 1099596 | 100.0 |
| 7  | 234.9394 | 106563  | 9.7   |
| 8  | 236.9359 | 38786   | 3.5   |
| 9  | 255.2107 | 31617   | 2.9   |
| 10 | 265.1259 | 41238   | 3.8   |

**Figure S51.** Copy of HRMS ESI analysis of the derivatives **14**.

**+MS, 0.1-0.2min #(3-10)**

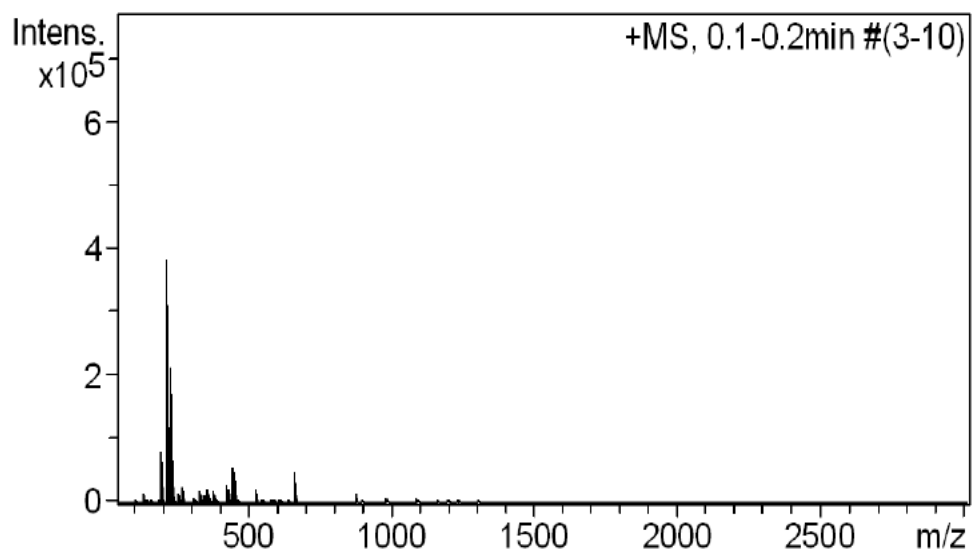

| #  | m/z      | I      | I%    |
|----|----------|--------|-------|
| 1  | 198.0200 | 79113  | 20.6  |
| 2  | 215.0470 | 384009 | 100.0 |
| 3  | 216.0486 | 40115  | 10.4  |
| 4  | 232.0725 | 210297 | 54.8  |
| 5  | 237.0266 | 28890  | 7.5   |
| 6  | 270.0862 | 24697  | 6.4   |
| 7  | 423.2511 | 27108  | 7.1   |
| 8  | 446.1064 | 54545  | 14.2  |
| 9  | 451.0617 | 46407  | 12.1  |
| 10 | 660.1441 | 46528  | 12.1  |

**Figure S52.** Copy of HRMS ESI analysis of the derivatives **15**.

**+MS, 0.1-0.2min #(3-10)**

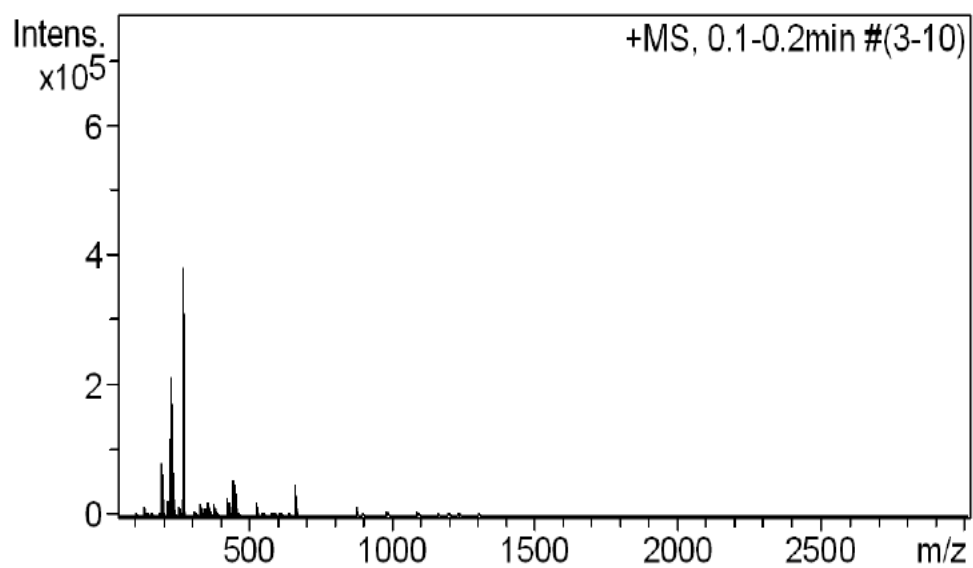

| #  | m/z      | I      | I %   |
|----|----------|--------|-------|
| 1  | 198.0200 | 79113  | 20.6  |
| 2  | 215.0470 | 24697  | 6.4   |
| 3  | 216.0486 | 40115  | 10.4  |
| 4  | 232.0725 | 210297 | 54.8  |
| 5  | 237.0266 | 28890  | 7.5   |
| 6  | 270.0862 | 384009 | 100.0 |
| 7  | 423.2511 | 27108  | 7.1   |
| 8  | 446.1064 | 54545  | 14.2  |
| 9  | 451.0617 | 46407  | 12.1  |
| 10 | 660.1441 | 46528  | 12.1  |

**Figure S53.** Copy of HRMS ESI analysis of the derivatives **16**.

**+MS, 0.0-0.2min #(2-10)**

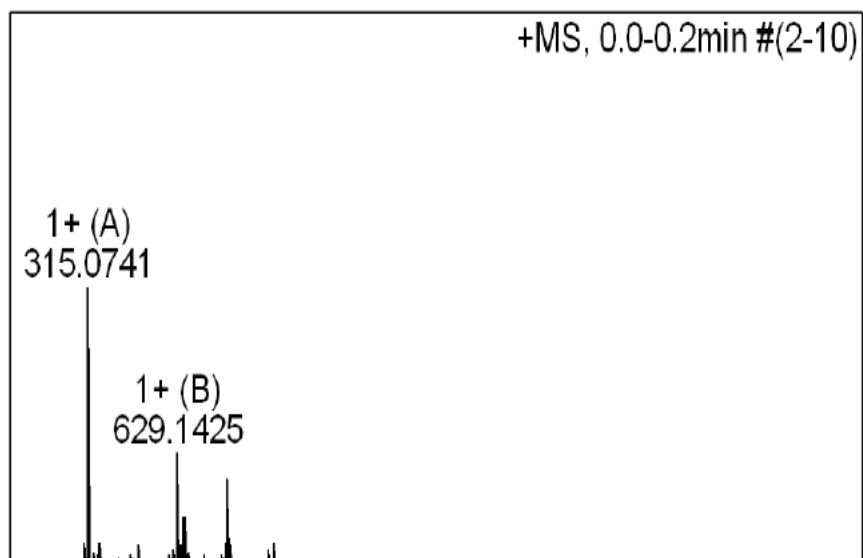

| # | m/z       | Res. | S/N | I     | I%    |
|---|-----------|------|-----|-------|-------|
| 1 | 315.0731  |      |     | 75307 | 100.0 |
| 2 | 629.1402  |      |     | 30153 | 40.0  |
| 3 | 651.1200  |      |     | 12670 | 16.8  |
| 4 | 1295.2211 |      |     | 12511 | 16.6  |
| 5 | 1609.2884 |      |     | 23044 | 30.6  |

**Figure S54.** Copy of HRMS ESI analysis of the derivatives **18**.

**-MS, 0.1-0.3min #(4-15)**

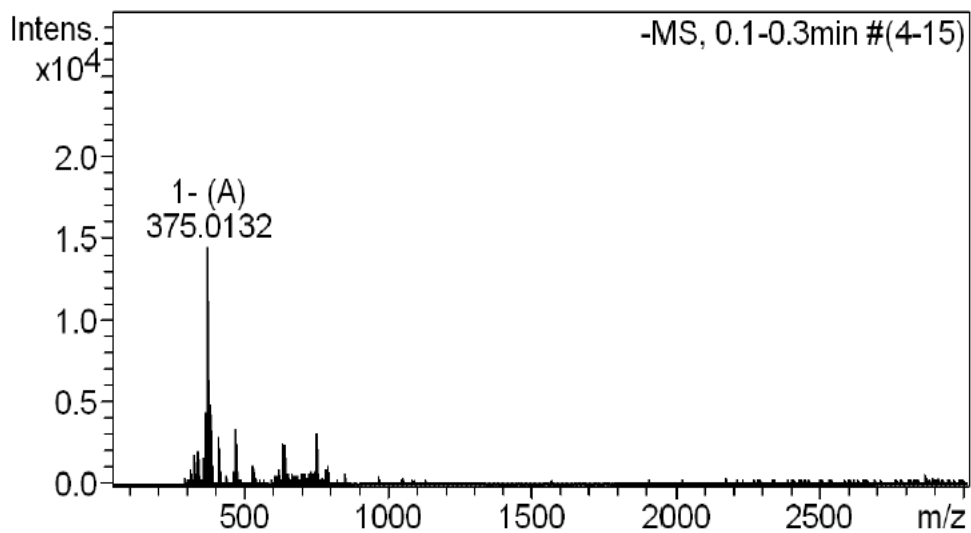

| #  | m/z      | Res.  | S/N   | I     | I %   |
|----|----------|-------|-------|-------|-------|
| 1  | 367.9853 | 13464 | 151.5 | 4345  | 30.0  |
| 2  | 369.9795 | 12819 | 92.7  | 2667  | 18.4  |
| 3  | 375.0132 | 12785 | 501.7 | 14472 | 100.0 |
| 4  | 376.0169 | 12132 | 106.2 | 3073  | 21.2  |
| 5  | 377.0124 | 13331 | 217.7 | 6298  | 43.5  |
| 6  | 383.9793 | 13036 | 144.0 | 4198  | 29.0  |
| 7  | 385.9771 | 12983 | 104.2 | 3046  | 21.1  |
| 8  | 410.9877 | 13927 | 95.2  | 2855  | 19.7  |
| 9  | 470.9989 | 15840 | 105.9 | 3361  | 23.2  |
| 10 | 751.0112 | 16648 | 58.5  | 3092  | 21.4  |

## Copies of HPLC Analysis

**Figure S55.** Copy HPLC analysis of the derivative **7a**.

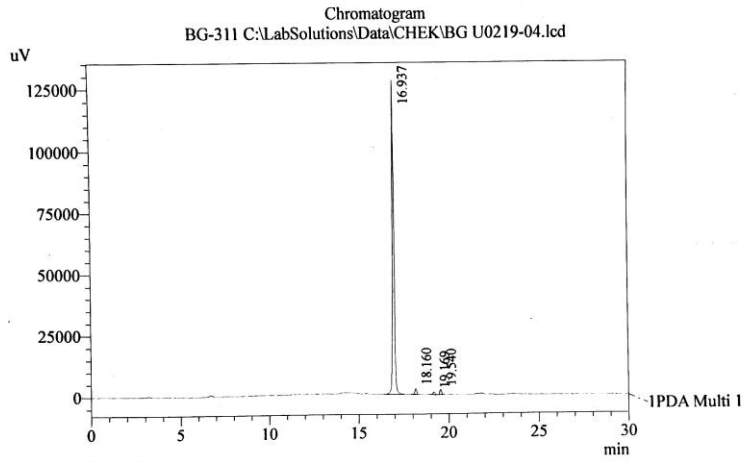

1 PDA Multi 1 / 300nm 4nm

PDA Ch1 300nm 4nm

| Peak# | Ret. Time | Area    | Height | Area %  |
|-------|-----------|---------|--------|---------|
| 1     | 16.937    | 1069823 | 127742 | 96.467  |
| 2     | 18.160    | 16684   | 2427   | 1.504   |
| 3     | 19.169    | 7836    | 1157   | 0.707   |
| 4     | 19.540    | 14665   | 2153   | 1.322   |
| Total |           | 1109008 | 133479 | 100.000 |

Method Filename : FOS Cv.lcm 19.02.2024 13:19:56

| Time  | Unit       | Command | Valu |
|-------|------------|---------|------|
| 0.01  | Pumps      | B.Conc  | 20   |
| 30.00 | Pumps      | B.Conc  | 80   |
| 33.00 | Pumps      | B.Conc  | 20   |
| 45.00 | Controller | Stop    |      |

Shimadzu LC-20 AD; System - FOS Colon- Kromasil-100-5µm. C-18, 4,6x250 mm. N 62511  
Elution: A - H3PO4 0,01M pH 2,6; B - MeCN, fl - 1.0 ml/min, loop 20 mkl

**Figure S56.** Copy HPLC analysis of the derivative **7b**.

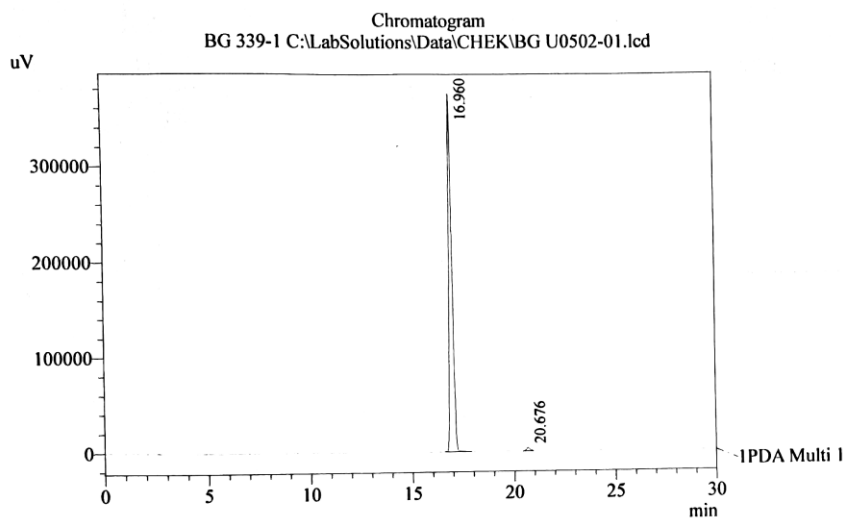

1 PDA Multi 1 / 300nm 4nm

PDA Ch1 300nm 4nm

| Peak# | Ret. Time | Area    | Height | Area %  |
|-------|-----------|---------|--------|---------|
| 1     | 16.960    | 4423944 | 376008 | 99.040  |
| 2     | 20.676    | 42884   | 3472   | 0.960   |
| Total |           | 4466828 | 379480 | 100.000 |

Method Filename : FOS Cv.lcm 02.05.2024 12:48:55

| Time  | Unit       | Command | Valu |
|-------|------------|---------|------|
| 0.01  | Pumps      | B.Conc  | 30   |
| 30.00 | Pumps      | B.Conc  | 80   |
| 33.00 | Pumps      | B.Conc  | 30   |
| 45.00 | Controller | Stop    |      |

Shimadzu LC-20 AD; System - FOS Colon- Kromasil-100-5mkm. C-18, 4,6x250 mm. N 62511  
Elution: A - H3PO4 0,01M pH 2,6; B - MeCN, fl - 1.0 ml/min, loop 20 mk1

**Figure S57.** Copy HPLC analysis of the derivative **7c**.

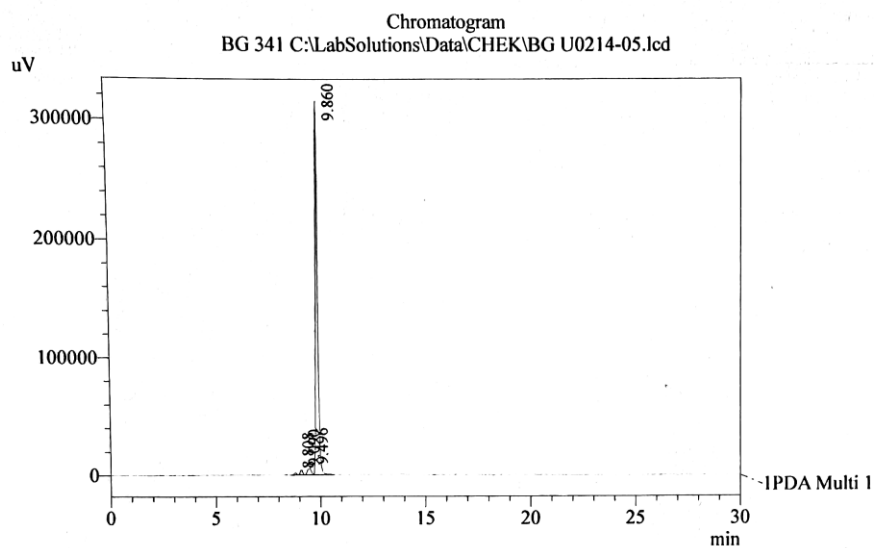

1 PDA Multi 1 / 300nm 4nm

PDA Ch1 300nm 4nm

| Peak#        | Ret. Time | Area           | Height        | Area %         |
|--------------|-----------|----------------|---------------|----------------|
| 1            | 8.808     | 13042          | 1743          | 0.496          |
| 2            | 9.090     | 31396          | 4134          | 1.193          |
| 3            | 9.496     | 68893          | 5568          | 2.618          |
| 4            | 9.860     | 2517785        | 314791        | 95.693         |
| <b>Total</b> |           | <b>2631116</b> | <b>326235</b> | <b>100.000</b> |

Method Filename : FOS Cv.lcm 15.02.2024 12:30:13

| Time  | Unit       | Command | Value |
|-------|------------|---------|-------|
| 0.01  | Pumps      | B.Conc  | 40    |
| 30.00 | Pumps      | B.Conc  | 80    |
| 33.00 | Pumps      | B.Conc  | 40    |
| 45.00 | Controller | Stop    |       |

Shimadzu LC-20 AD; System - FOS Colon- Kromasil-100-5mkm. C-18, 4,6x250 mm. N 62511  
Elution: A - H3PO4 0,01M pH 2,6; B - MeCN, fl - 1.0 ml/min, loop 20 mkl



**Figure S58.** Copy HPLC analysis of the derivative **7d**.

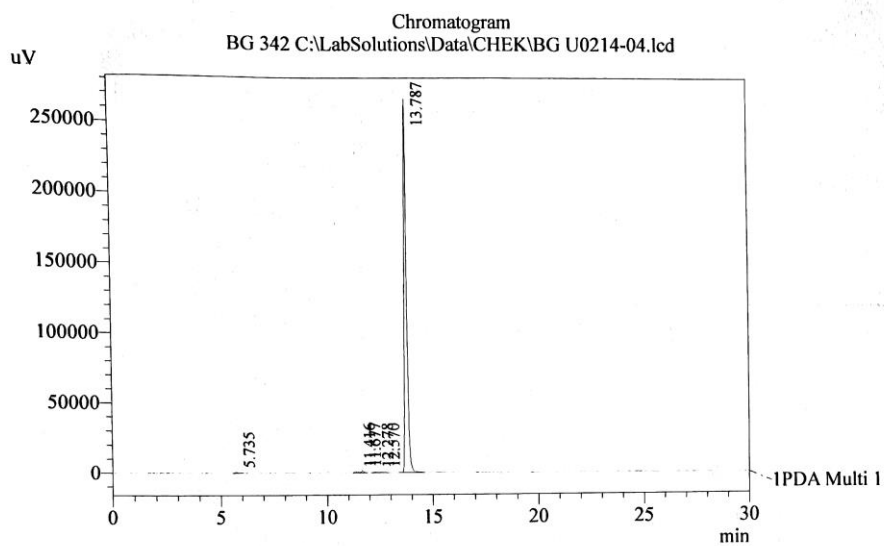

1 PDA Multi 1 / 300nm 4nm

PDA Ch1 300nm 4nm

| Peak# | Ret. Time | Area    | Height | Area %  |
|-------|-----------|---------|--------|---------|
| 1     | 5.735     | 2963    | 484    | 0.127   |
| 2     | 11.416    | 6428    | 798    | 0.275   |
| 3     | 11.677    | 8524    | 1066   | 0.364   |
| 4     | 12.278    | 3950    | 521    | 0.169   |
| 5     | 12.570    | 4358    | 605    | 0.186   |
| 6     | 13.787    | 2313360 | 267031 | 98.879  |
| Total |           | 2339583 | 270505 | 100.000 |

Method Filename : FOS Cv.lcm 15.02.2024 11:49:35

| Time  | Unit       | Command | Valu |
|-------|------------|---------|------|
| 0.01  | Pumps      | B.Conc  | 40   |
| 30.00 | Pumps      | B.Conc  | 80   |
| 33.00 | Pumps      | B.Conc  | 40   |
| 45.00 | Controller | Stop    |      |

Shimadzu LC-20 AD; System - FOS Colon- Kromasil-100-5mkm. C-18, 4,6x250 mm. N 62511  
Elution: A - H3PO4 0,01M pH 2,6; B - MeCN, fl - 1.0 ml/min, loop 20 mkl

**Figure S59.** Copy HPLC analysis of the derivative **7e**.

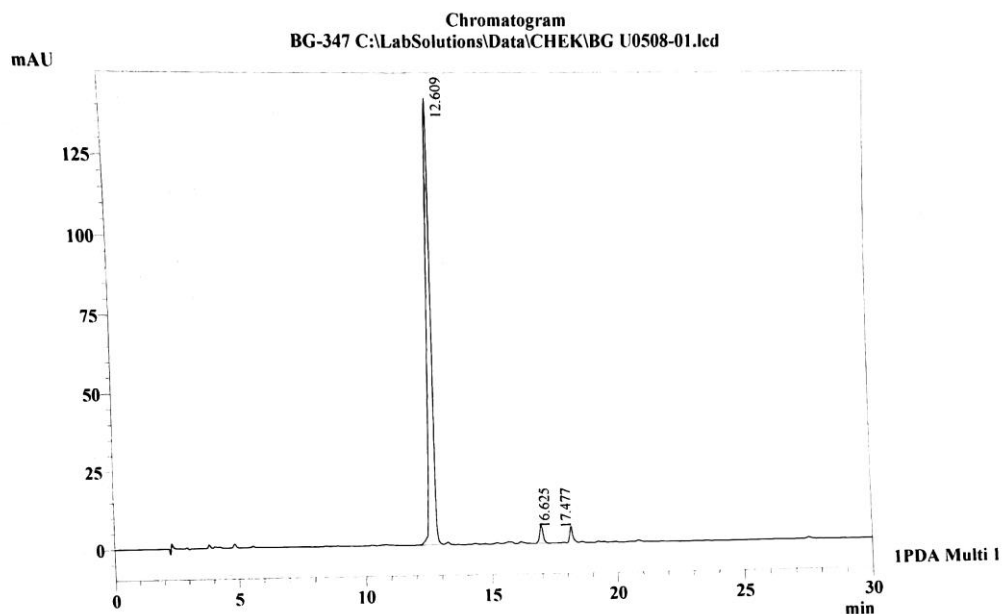

1 PDA Multi 1 / 270nm 4nm

PeakTable

| Peak# | Ret. Time | Area    | Height | Area %  |
|-------|-----------|---------|--------|---------|
| 1     | 12.609    | 1682637 | 141823 | 96.739  |
| 2     | 16.625    | 27938   | 3566   | 1.606   |
| 3     | 17.477    | 28776   | 3568   | 1.654   |
| Total |           | 1739350 | 148958 | 100.000 |

| <<LC Program>> |            | Method  |       |
|----------------|------------|---------|-------|
| Time           | Unit       | Command | Value |
| 0.10           | Pumps      | B.Conc  | 30    |
| 30.00          | Pumps      | B.Conc  | 80    |
| 33.00          | Pumps      | B.Conc  | 30    |
| 45.00          | Controller | Stop    |       |

Method Filename : FOS Bv.lcm

Shimadzu LC-20AD; 2-System FOS, Colon Kromasil 100-C18, size 5µm, 4,6\*250mm, N 86912  
Elution: A - H<sub>3</sub>PO<sub>4</sub> 0.01M pH 2.6; B - MeCN, fl. 1,0 ml/min, loop 20µkl.

**Figure S60.** Copy HPLC analysis of the derivative **7f**.

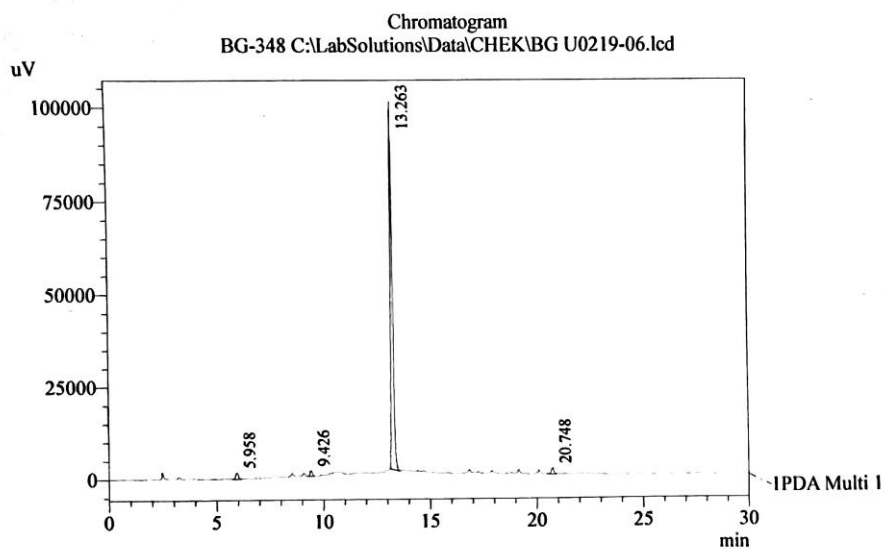

1 PDA Multi 1 / 254nm 4nm

PDA Ch1 254nm 4nm

| Peak# | Ret. Time | Area   | Height | Area %  |
|-------|-----------|--------|--------|---------|
| 1     | 5.958     | 14245  | 1718   | 1.923   |
| 2     | 9.426     | 11247  | 1529   | 1.519   |
| 3     | 13.263    | 701459 | 98971  | 94.717  |
| 4     | 20.748    | 13632  | 1738   | 1.841   |
| Total |           | 740583 | 103956 | 100.000 |

Method Filename : FOS Cv.lcm 19.02.2024 14:59:05

| Time  | Unit       | Command | Valu |
|-------|------------|---------|------|
| 0.01  | Pumps      | B.Conc  | 20   |
| 30.00 | Pumps      | B.Conc  | 80   |
| 33.00 | Pumps      | B.Conc  | 20   |
| 45.00 | Controller | Stop    |      |

Shimadzu LC-20 AD; System - FOS Colon- Kromasil-100-5mkm. C-18, 4,6x250 mm. N 62511  
Elution: A - H<sub>3</sub>PO<sub>4</sub> 0,01M pH 2,6; B - MeCN, fl - 1.0 ml/min, loop 20 mkl

**Figure S61.** Copy HPLC analysis of the derivative **7g**.

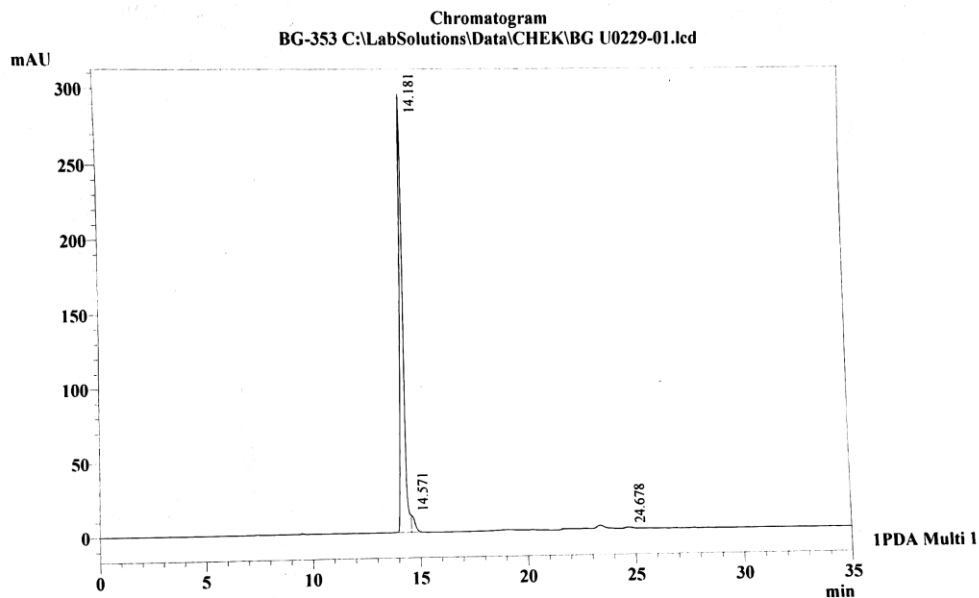

1 PDA Multi 1 / 385nm 4nm

PeakTable

| Peak# | Ret. Time | Area    | Height | Area %  |
|-------|-----------|---------|--------|---------|
| 1     | 14.181    | 3243431 | 295737 | 95.697  |
| 2     | 14.571    | 125395  | 11383  | 3.700   |
| 3     | 24.678    | 20460   | 960    | 0.604   |
| Total |           | 3389286 | 308080 | 100.000 |

| <<LC Program>> |            | Method  |       |
|----------------|------------|---------|-------|
| Time           | Unit       | Command | Value |
| 0.10           | Pumps      | B.Conc  | 10    |
| 30.00          | Pumps      | B.Conc  | 50    |
| 33.00          | Pumps      | B.Conc  | 10    |
| 45.00          | Controller | Stop    |       |

Method Filename : FOS A.lcm

Shimadzu LC-20AD; 2-System FOS, Colon Kromasil 100-C18, size 5µm, 4,6\*250mm, N 86912  
Elution: A - H<sub>3</sub>PO<sub>4</sub> 0.01M pH 2.6; B - MeCN, fl. 1.0 ml/min, loop 20µl.

**Figure S62.** Copy HPLC analysis of the derivative **7h**.

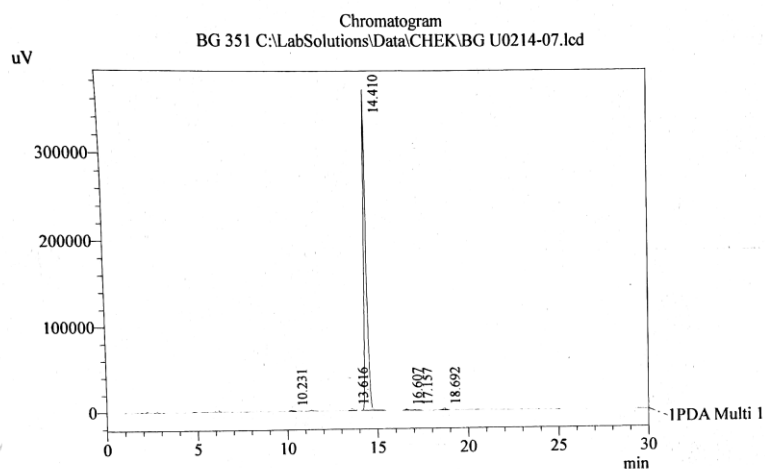

1 PDA Multi 1 / 275nm 4nm  
PDA Ch1 275nm 4nm

| Peak# | Ret. Time | Area    | Height | Area %  |
|-------|-----------|---------|--------|---------|
| 1     | 10.231    | 12383   | 1592   | 0.327   |
| 2     | 13.616    | 18386   | 2216   | 0.486   |
| 3     | 14.410    | 3707036 | 370558 | 97.986  |
| 4     | 16.607    | 11907   | 1361   | 0.315   |
| 5     | 17.157    | 14927   | 1345   | 0.395   |
| 6     | 18.692    | 18594   | 1954   | 0.491   |
| Total |           | 3783233 | 379024 | 100.000 |

Method Filename : FOS Cv.lcm 15.02.2024 14:02:12

| Time  | Unit       | Command | Valu |
|-------|------------|---------|------|
| 0.01  | Pumps      | B.Conc  | 40   |
| 30.00 | Pumps      | B.Conc  | 80   |
| 33.00 | Pumps      | B.Conc  | 40   |
| 45.00 | Controller | Stop    |      |

Shimadzu LC-20 AD; System - FOS Colon- Kromasil-100-5mkm. C-18, 4,6x250 mm. N 62511  
Elution: A - H3PO4 0,01M pH 2,6; B - MeCN, fl - 1.0 ml/min, loop 20 mkl

**Figure S63.** Copy HPLC analysis of the derivative **8a**.

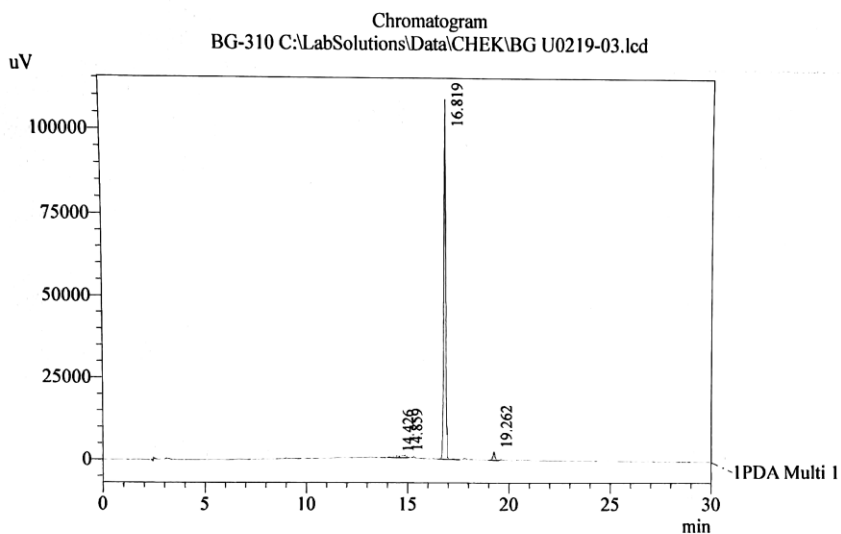

1 PDA Multi 1 / 300nm 4nm  
PDA Ch1 300nm 4nm

| Peak# | Ret. Time | Area   | Height | Area %  |
|-------|-----------|--------|--------|---------|
| 1     | 14.426    | 12250  | 475    | 1.342   |
| 2     | 14.859    | 12616  | 778    | 1.382   |
| 3     | 16.819    | 867961 | 108888 | 95.107  |
| 4     | 19.262    | 19788  | 2551   | 2.168   |
| Total |           | 912614 | 112692 | 100.000 |

Method Filename : FOS Cv.lcm 19.02.2024 12:32:34

| Time  | Unit       | Command | Valu |
|-------|------------|---------|------|
| 0.01  | Pumps      | B.Conc  | 20   |
| 30.00 | Pumps      | B.Conc  | 80   |
| 33.00 | Pumps      | B.Conc  | 20   |
| 45.00 | Controller | Stop    |      |

Shimadzu LC-20 AD; System - FOS Colon- Kromasil-100-5mkm. C-18, 4,6x250 mm. N 62511  
Elution: A - H<sub>3</sub>PO<sub>4</sub> 0,01M pH 2,6; B - MeCN, fl - 1.0 ml/min, loop 20 mkl

**Figure S64.** Copy HPLC analysis of the derivative **8b**.

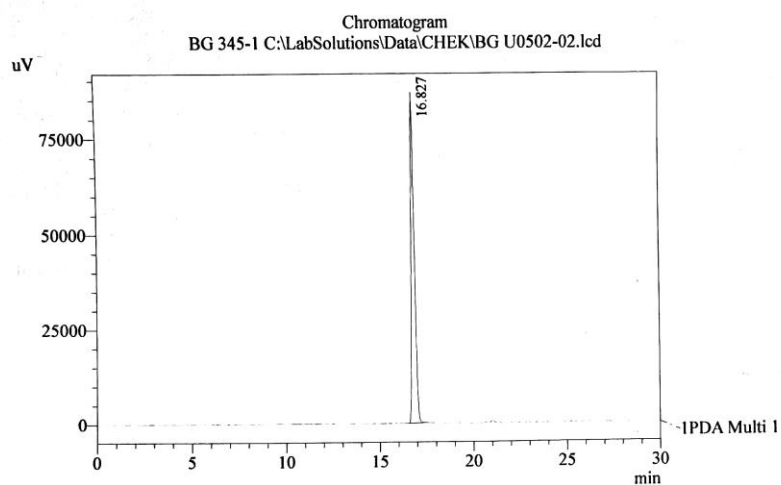

1 PDA Multi 1 / 300nm 4nm

PDA Ch1 300nm 4nm

| Peak# | Ret. Time | Area    | Height | Area %  |
|-------|-----------|---------|--------|---------|
| 1     | 16.827    | 1125194 | 86760  | 100.000 |
| Total |           | 1125194 | 86760  | 100.000 |

Method Filename : FOS Cv.lcm 02.05.2024 13:38:33

| Time  | Unit       | Command | Valu |
|-------|------------|---------|------|
| 0.01  | Pumps      | B.Conc  | 30   |
| 30.00 | Pumps      | B.Conc  | 80   |
| 33.00 | Pumps      | B.Conc  | 30   |
| 45.00 | Controller | Stop    |      |

Shimadzu LC-20 AD; System - FOS Colon- Kromasil-100-5mkm. C-18, 4,6x250 mm. N 62511  
Elution: A - H3PO4 0,01M pH 2,6; B - MeCN, fl - 1.0 ml/min, loop 20 mkl

**Figure S65.** Copy HPLC analysis of the derivative **8c**.

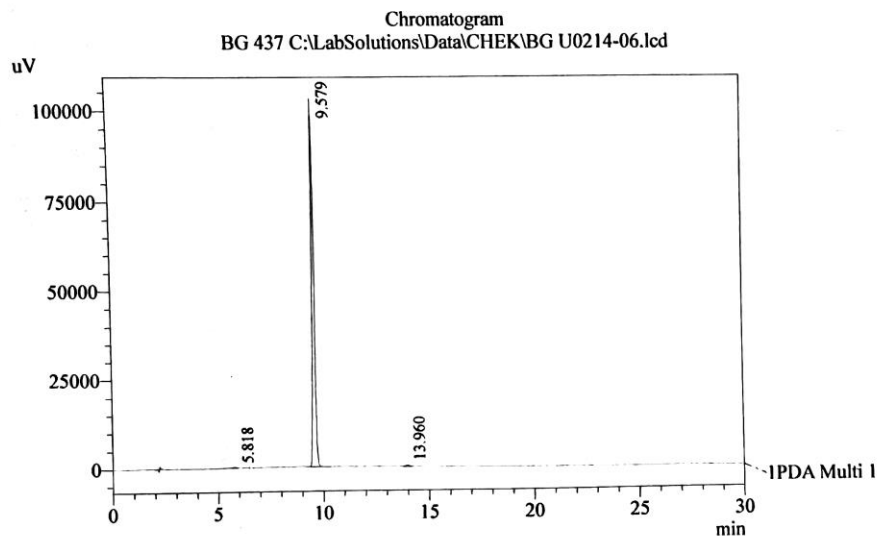

1 PDA Multi 1 / 300nm 4nm

PDA Ch1 300nm 4nm

| Peak# | Ret. Time | Area   | Height | Area %  |
|-------|-----------|--------|--------|---------|
| 1     | 5.818     | 1098   | 114    | 0.118   |
| 2     | 9.579     | 926621 | 103070 | 99.463  |
| 3     | 13.960    | 3901   | 436    | 0.419   |
| Total |           | 931619 | 103621 | 100.000 |

Method Filename : FOS Cv.lcm 15.02.2024 13:17:11

| Time  | Unit       | Command | Valu |
|-------|------------|---------|------|
| 0.01  | Pumps      | B.Conc  | 40   |
| 30.00 | Pumps      | B.Conc  | 80   |
| 33.00 | Pumps      | B.Conc  | 40   |
| 45.00 | Controller | Stop    |      |

Shimadzu LC-20 AD; System - FOS Colon- Kromasil-100-5mkm. C-18, 4,6x250 mm. N 62511  
Elution: A - H3PO4 0,01M pH 2,6; B - MeCN, fl - 1.0 ml/min, loop 20 mkl



Figure S66. Copy HPLC analysis of the derivative 8g.

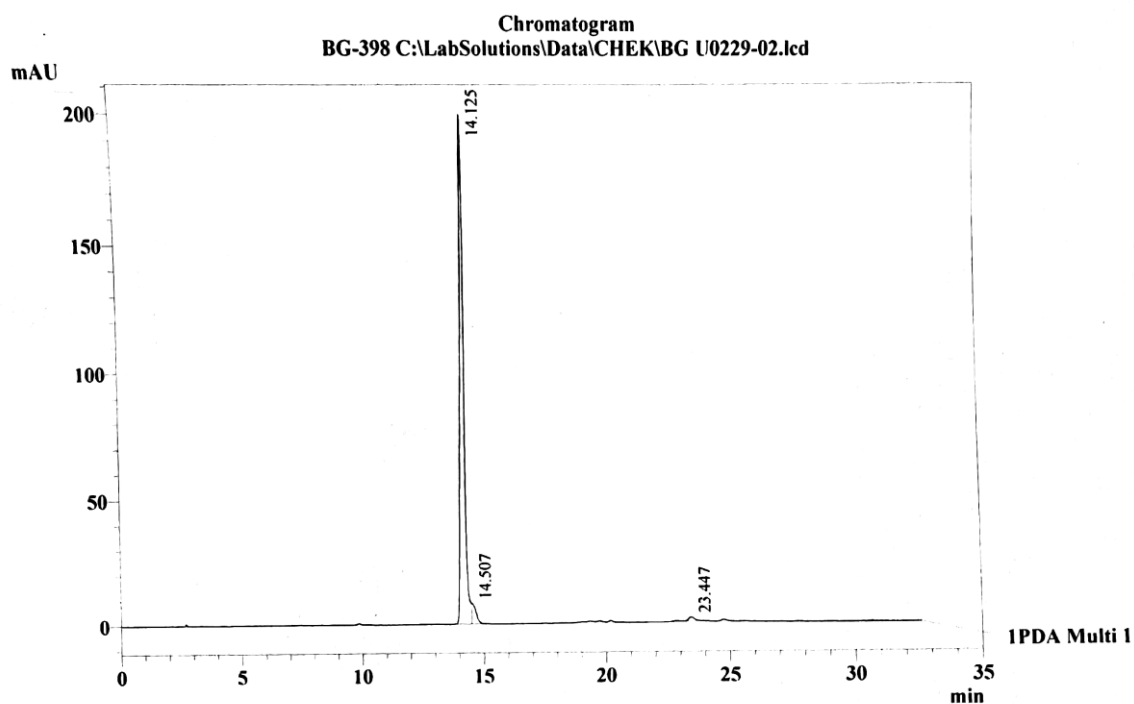

PeakTable

PDA Ch1 385nm 4nm

| Peak# | Ret. Time | Area    | Height | Area %  |
|-------|-----------|---------|--------|---------|
| 1     | 14.125    | 2219217 | 199749 | 95.026  |
| 2     | 14.507    | 93594   | 7983   | 4.008   |
| 3     | 23.447    | 22573   | 1492   | 0.967   |
| Total |           | 2335384 | 209223 | 100.000 |

<<LC Program>>

| Time  | Unit       | Method | Command | Value |
|-------|------------|--------|---------|-------|
| 0.10  | Pumps      |        | B.Conc  | 10    |
| 30.00 | Pumps      |        | B.Conc  | 50    |
| 33.00 | Pumps      |        | B.Conc  | 10    |
| 45.00 | Controller |        | Stop    |       |

Method Filename : FOS A.lcm

Shimadzu LC-20AD; 2-System FOS, Colon Kromasil 100-C18, size 5µm, 4,6\*250mm, N 86912  
Elution: A - H3PO4 0.01M pH 2.6; B - MeCN, fl. 1,0 ml/min, loop 20µl.

Figure S67. Copy HPLC analysis of the derivative 18.

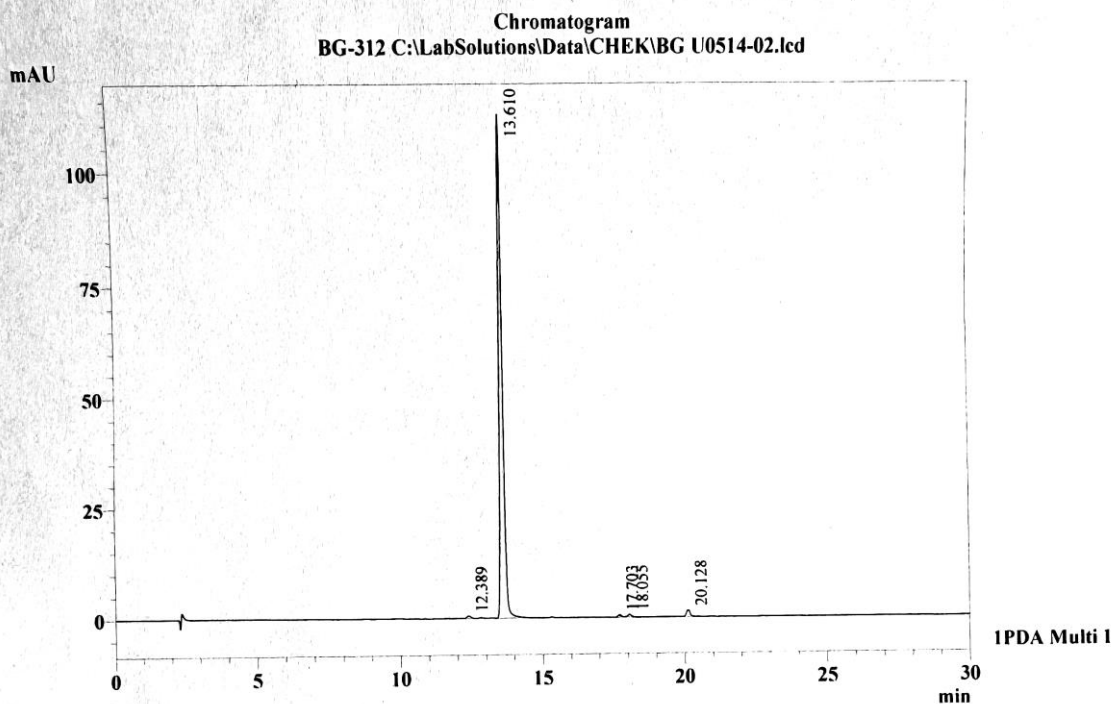

1 PDA Multi 1 / 300nm 4nm

PeakTable

PDA Ch1 300nm 4nm

| Peak# | Ret. Time | Area   | Height | Area %  |
|-------|-----------|--------|--------|---------|
| 1     | 12.389    | 5360   | 554    | 0.555   |
| 2     | 13.610    | 939375 | 112361 | 97.230  |
| 3     | 17.703    | 3962   | 501    | 0.410   |
| 4     | 18.055    | 4798   | 588    | 0.497   |
| 5     | 20.128    | 12646  | 1515   | 1.309   |
| Total |           | 966140 | 115519 | 100.000 |

Method

<<LC Program>>

| Time  | Unit       | Command | Value |
|-------|------------|---------|-------|
| 0.10  | Pumps      | B.Conc  | 30    |
| 30.00 | Pumps      | B.Conc  | 80    |
| 33.00 | Pumps      | B.Conc  | 90    |
| 35.00 | Pumps      | B.Conc  | 30    |
| 45.00 | Controller | Stop    |       |

Method Filename : FOS Bv.lcm

Shimadzu LC-20AD; 2-System FOS, Colon Kromasil 100-C18, size 5mkm, 4,6\*250mm, N 86912  
Elution: A - H3PO4 0.01M pH 2.6; B - MeCN, fl. 1,0 ml/min, loop 20mkl.

Copies of 2D NMR Spectra of 7a.

Figure S68.  $^1\text{H}$ - $^{13}\text{C}$  HSQC spectrum for compound 7a.

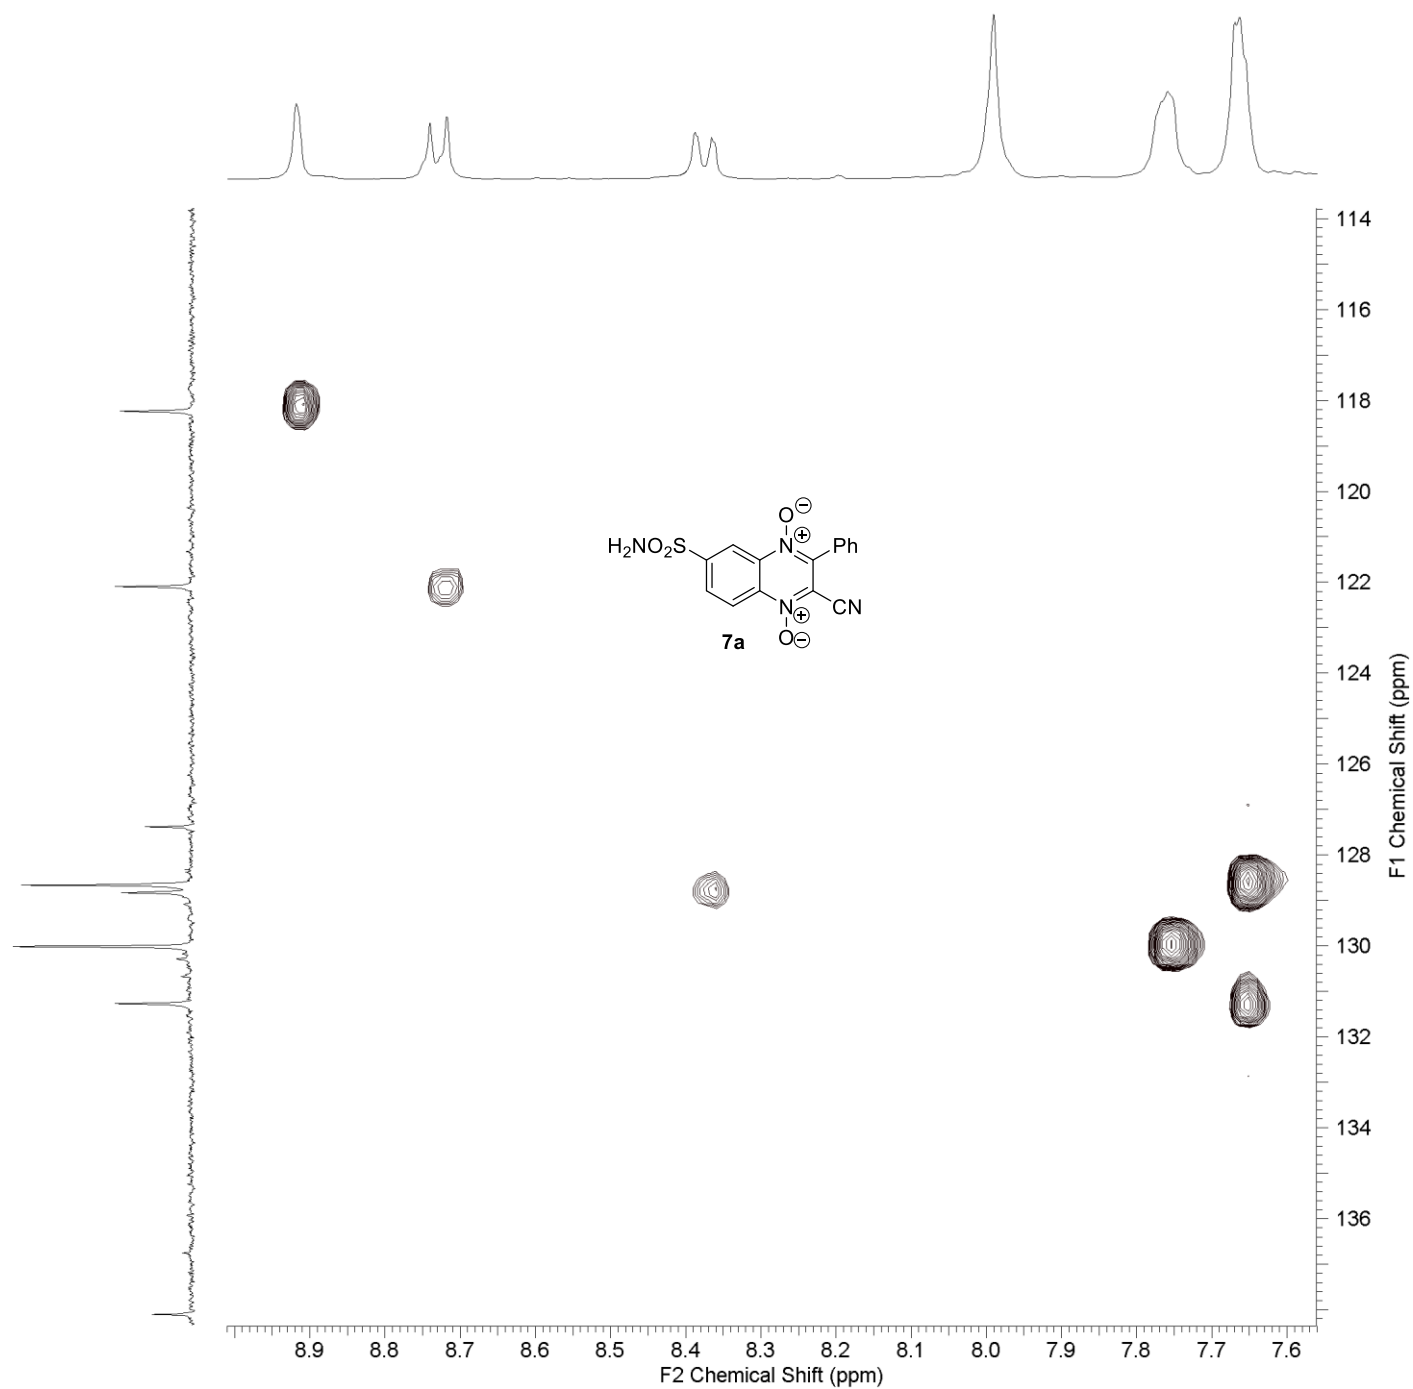

Figure S69. HMBC spectrum for compound 7a.

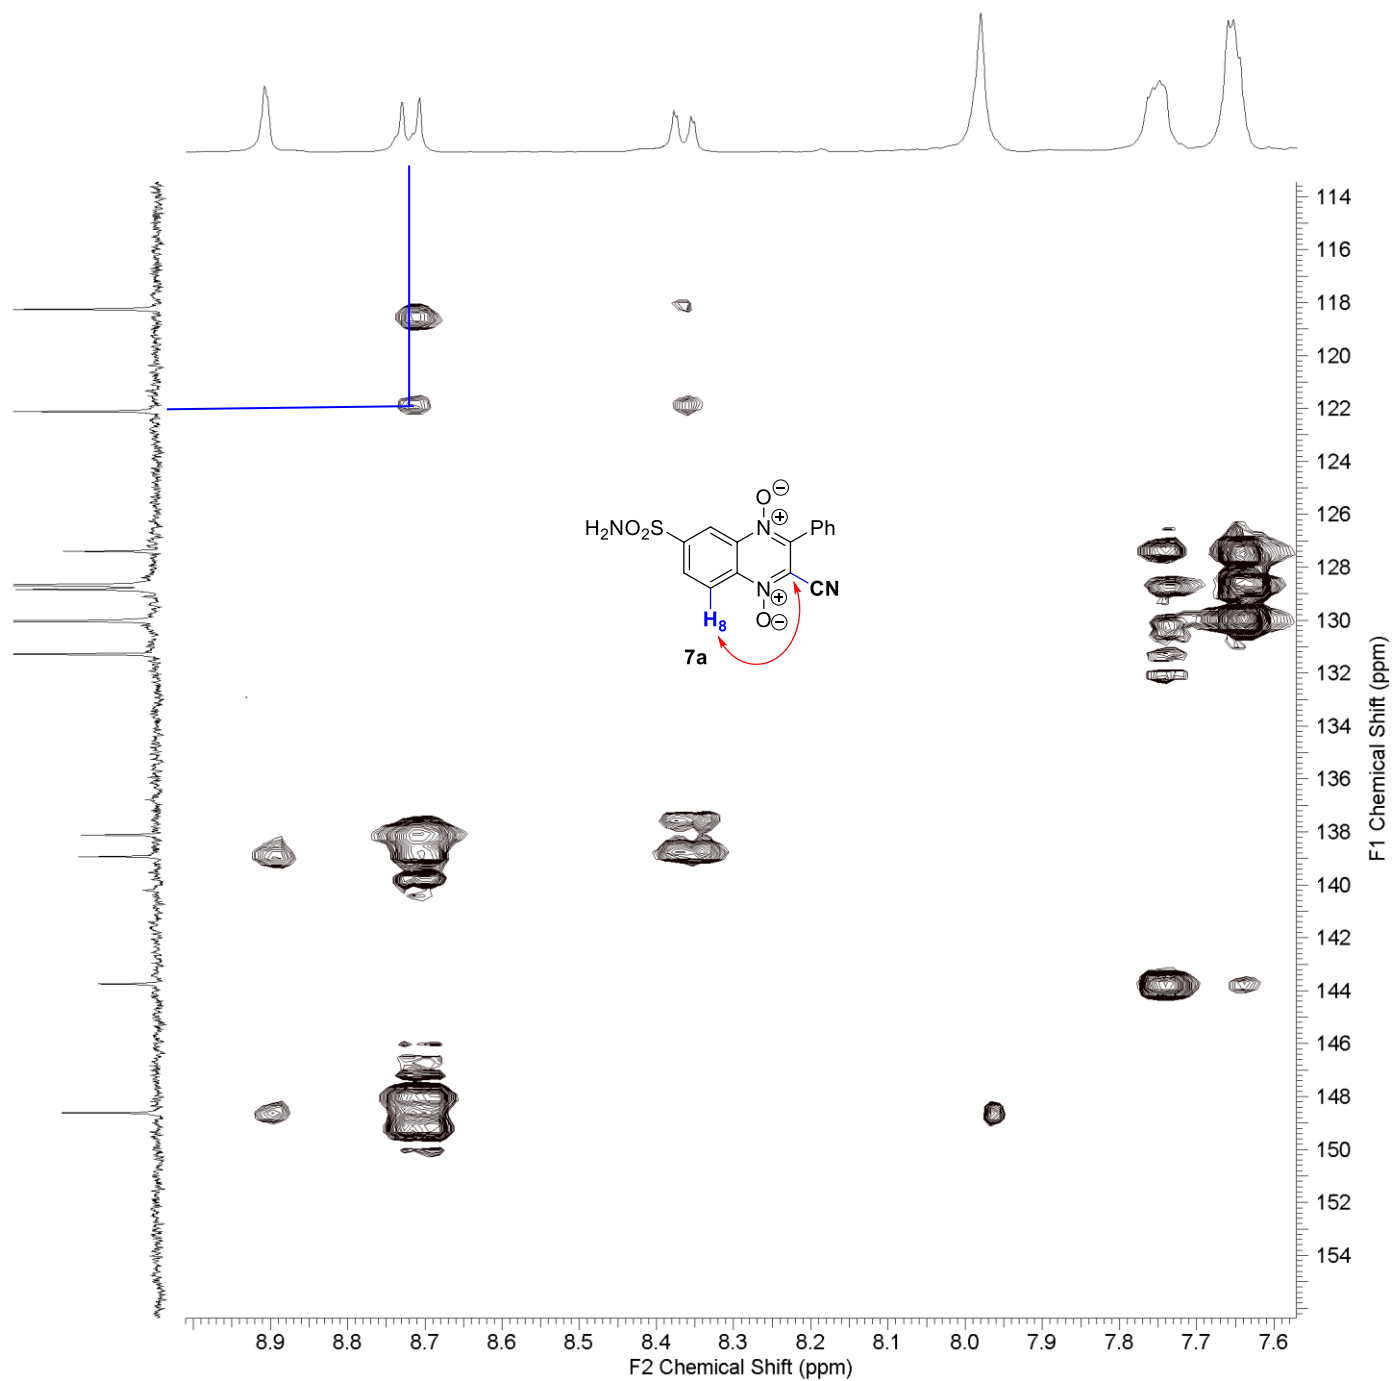

**Figure S70.** Selective NOE spectrum at H-5 at 7.75 ppm for compound **7a**.

BG-311 DMSO-d6 SelNOE at 7.751 ppm

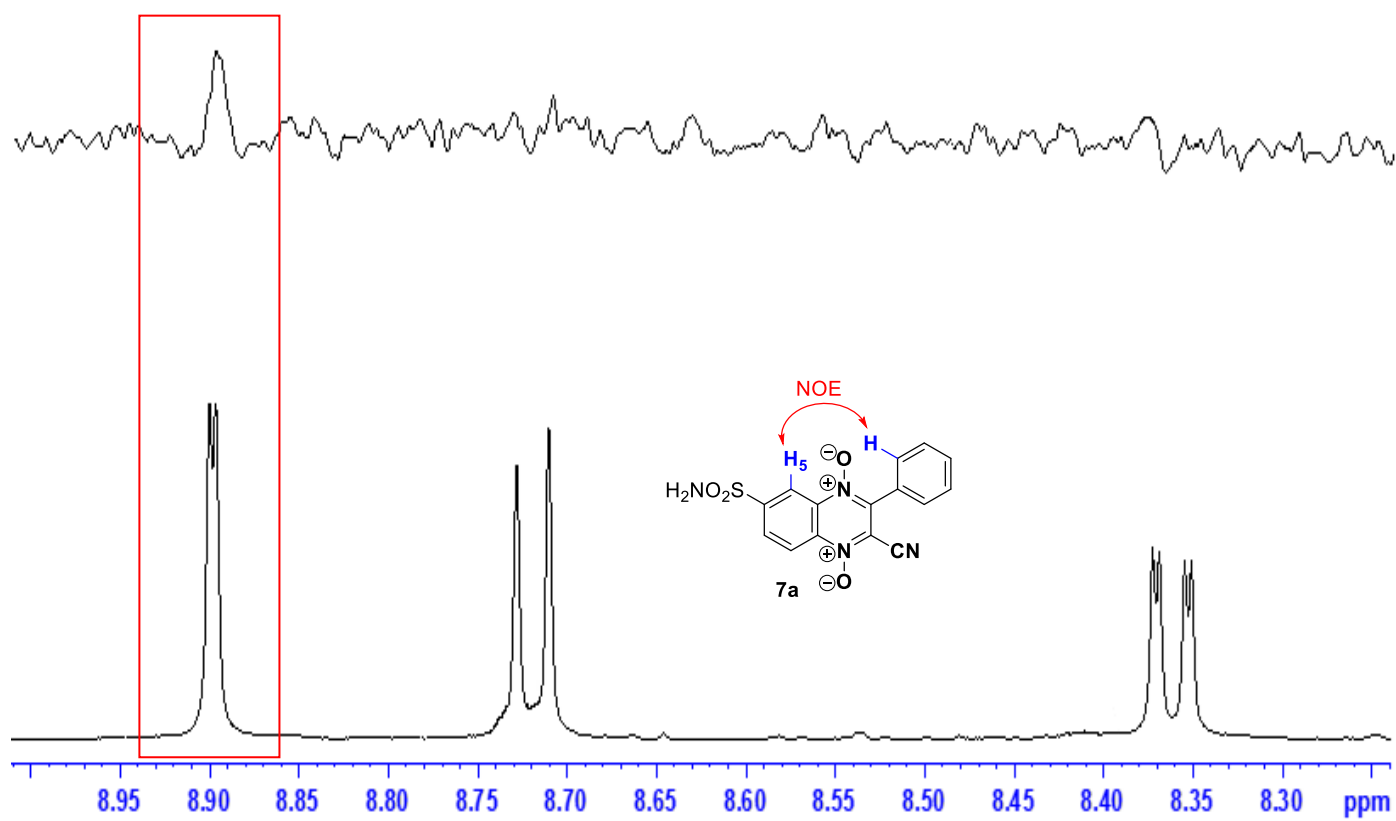

Supplement: d4ra04548c1.pdf [file d4ra04548c1.pdf]
